# Supplementary material for: Copper-catalyzed arylation of biguanide derivatives via C–N cross-coupling reactions
Source: Royal Society of Chemistry journal article supplement (doi:10.1039/c5ob01258a), 2015-01-01
Supplement: c5ob01258a1.pdf [file c5ob01258a1.pdf]

## Supporting Information

### Copper-Catalyzed Arylation of Biguanide Derivatives *via* C–N

#### Cross–Coupling Reactions

Chen Zhang <sup>a,\*</sup>, Bo Huang <sup>a</sup>, Ai-Qing Bao <sup>b</sup>, Xiao Li <sup>a</sup>, Shunna Guo <sup>a</sup>, Jinquan Zhang <sup>a</sup>, Junzhi Xu <sup>a</sup>  
and Dong-Mei Cui <sup>b\*</sup>

<sup>a</sup> College of Pharmaceutical Sciences, Zhejiang University, Hangzhou 310058, China

<sup>b</sup> College of Pharmaceutical Science, Zhejiang University of Technology, Hangzhou  
10014, China

E-mail Address: chen Zhang@zju.edu.cn

#### Table of Contents

|                                                                      |            |
|----------------------------------------------------------------------|------------|
| <b>1.General Methods</b>                                             | <b>S2</b>  |
| <b>2. General Procedure for Synthesis of diguanide hydroiodide</b>   | <b>S2</b>  |
| <b>3. General Procedure for Synthesis of diguanide hydrobromides</b> | <b>S7</b>  |
| <b>4.NMR Spectra for All Compounds</b>                               | <b>S10</b> |
| <b>5.X-ray structure of 3o</b>                                       | <b>S52</b> |

**General Methods:**

Under otherwise noted, materials such as compound **2** were obtained from commercial suppliers and used without further purification. Thin layer chromatography (TLC) was performed using silica gel 60 F254 and visualized using UV light. Column chromatography was performed with silica gel (mesh 300~400). <sup>1</sup>H NMR and <sup>13</sup>C NMR spectra recorded on a Bruker Avance 500 MHz spectrometer in DMSO-*d*<sub>6</sub> with Me<sub>4</sub>Si as an internal standard. All products are new compounds, data were reported as follows: chemical shift in parts per million ( $\delta$ ), multiplicity (s = singlet, d = doublet, t = triplet, q = quartet, br = broad, and m = multiplet), coupling constant in Hertz (Hz) and integration.

**General Procedure for Synthesis of Biguanide hydroiodide:**

To a mixture of biguanide hydroiodide (1.0 mmol), aryl iodide (1.0 mmol), 2-(pyridin-2-yl)pyridine (0.2 mmol), and K<sub>3</sub>PO<sub>4</sub> (6.0 mmol) in THF (5 mmol), was added CuI (10 mol %). The resulting mixture was then sealed and stirred for 12 h at 80 °C. After completion, the reaction mixture was filtered and the precipitates were washed with methanol. The mixture was evaporated under vacuum, and the residue was purified by flash chromatography with CH<sub>2</sub>Cl<sub>2</sub> and CH<sub>3</sub>OH (3:1) as the eluent to give the pure product.

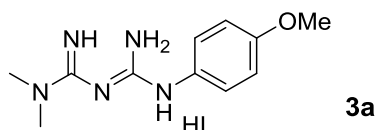

***N*-(4-methoxyphenyl)-dimethylbiguanide hydroiodide (3a)**

Yellow solid; Mp: 203-204 °C; IR (KBr, cm<sup>-1</sup>): 3850.68, 3448.42, 2357.29, 1634.31, 1583.19, 1558.78, 1435.81, 1258.91, 1087.14, 771.21; <sup>1</sup>H NMR (500 MHz, DMSO-*d*<sub>6</sub>) δ 8.83 (s, 1H), 7.46 (s, 2H), 7.24 (d, *J* = 9.0 Hz, 2H), 6.89 (d, *J* = 9.0 Hz, 2H), 6.62 (s, 2H), 3.73 (s, 3H), 2.94 (s, 6H); <sup>13</sup>C NMR (125 MHz, DMSO-*d*<sub>6</sub>) δ 159.9, 155.8, 154.3, 131.1, 123.5, 113.9, 55.2, 37.6; HRMS (ESI) *m/z* [M-I]<sup>+</sup> calcd for C<sub>11</sub>H<sub>18</sub>N<sub>5</sub>O 236.1511, found 236.1510. Anal. Calcd for C<sub>11</sub>H<sub>18</sub>N<sub>5</sub>O: C, 36.38; H, 5.00; N, 19.28. Found: C, 36.33; H, 5.04; N, 19.26.

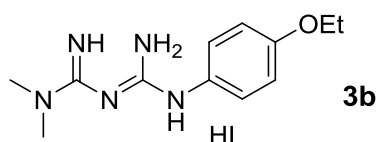

***N*-(4-ethoxyphenyl)-dimethylbiguanide hydroiodide (3b)**

Yellow solid; mp 161-162°C; IR (KBr, cm<sup>-1</sup>): 3295.08, 3196.88, 2973.78, 2920.38, 1628.41, 1585.84, 1537.92, 1511.00, 1413.88, 1238.72, 1043.71, 823.61; <sup>1</sup>H NMR (500 MHz, DMSO-*d*<sub>6</sub>) δ 8.80 (s, 1H), 7.43 (s, 2H), 7.22 (d, *J* = 8.4 Hz, 2H), 6.87 (d, *J* = 8.4 Hz, 2H), 6.59 (s, 2H), 3.98 (d, *J* = 6.5 Hz, 2H), 2.94 (s, 6H), 1.30 (t, *J* = 6.5 Hz, 3H); <sup>13</sup>C NMR (125 MHz, DMSO-*d*<sub>6</sub>) δ 159.9, 155.2, 154.3, 131.1, 123.6, 114.5, 63.2, 37.6, 14.7; HRMS (ESI) *m/z* [M-I]<sup>+</sup> calcd for C<sub>12</sub>H<sub>20</sub>N<sub>5</sub>O 250.1668, found 250.1664.

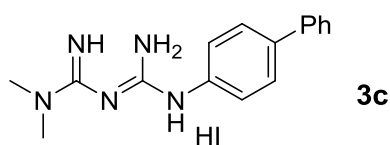

***N*-(1,1'-biphenyl)-dimethylbiguanide hydroiodide (3c)**

Yellow solid; mp: 223-224°C; IR(KBr,cm<sup>-1</sup>):3365.02, 3296.09, 2923.39, 1629.50, 1583.88, 1527.46, 1409.62, 1381.35, 1050.64, 826.32; <sup>1</sup>H NMR (500 MHz, DMSO-*d*<sub>6</sub>) δ 9.09 (s, 1H), 7.60-7.66 (m, 6H), 7.30-7.48 (m, 5H), 6.69 (s, 2H), 2.98 (s, 6H); <sup>13</sup>C NMR (125 MHz, DMSO-*d*<sub>6</sub>) δ 160.2, 153.2, 139.5, 138.2, 134.8, 128.8, 127.0, 125.8, 125.2, 121.0, 37.6; HRMS (ESI) *m/z* [M-I]<sup>+</sup> calcd for C<sub>16</sub>H<sub>20</sub>N<sub>5</sub> 282.1719, found 282.1722.

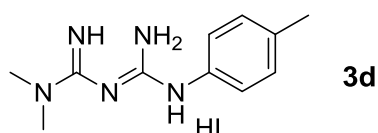

***N*-(4-methylphenyl)-dimethylbiguanide hydroiodide (3d)**

Yellow solid; mp: 195-196°C; IR (KBr, cm<sup>-1</sup>): 3343.42, 3190.06, 2923.06, 2855.17, 1630.82, 1588.19, 1545.25, 1541.90, 1415.37, 1204.94, 1052.22, 810.68; <sup>1</sup>H NMR (500 MHz, DMSO-*d*<sub>6</sub>) δ 8.88 (s, 1H), 7.51 (s, 2H), 7.22 (d, *J* = 8.2 Hz, 2H), 7.11 (d, *J* = 8.2 Hz, 2H), 6.61 (s, 2H), 2.95 (s, 6H), 2.25 (s, 3H); <sup>13</sup>C NMR (125 MHz, DMSO-*d*<sub>6</sub>) δ 160.1, 153.8, 135.9, 132.6, 129.2, 121.3, 37.7, 20.4; HRMS (ESI) *m/z* [M-I]<sup>+</sup> calcd for C<sub>11</sub>H<sub>18</sub>N<sub>5</sub> 220.1562, found 220.1570.

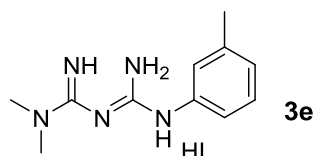

***N*-(3-methylphenyl)-dimethylbiguanide hydroiodide (3e)**

Yellow solid; mp: 203-204°C; IR (KBr, cm<sup>-1</sup>): 3421.56, 3366.23, 2923.92, 1635.22, 1595.50, 1548.05, 1421.21, 1302.22, 1133.87, 777.93. <sup>1</sup>H NMR (500 MHz, DMSO-*d*<sub>6</sub>) δ 8.90 (s, 1H), 7.54 (s, 2H), 7.14-7.19 (m, 3H), 6.83-6.90 (m, 1H), 6.63 (s, 2H), 2.96 (s, 6H), 2.26 (s, 3H); <sup>13</sup>C NMR (125 MHz, DMSO-*d*<sub>6</sub>) δ 160.0, 153.4, 138.5, 137.9, 128.5, 124.0, 121.4, 118.1, 37.6, 21.1; HRMS (ESI) *m/z* [M-I]<sup>+</sup> calcd for C<sub>11</sub>H<sub>18</sub>N<sub>5</sub> 220.1562, found 220.1568.

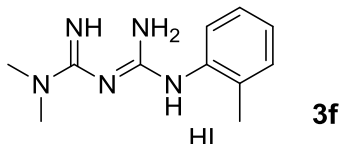

***N*-(2-methylphenyl)-dimethylbiguanide hydroiodide (3f)**

Yellow solid; mp: 177-178°C; IR (KBr, cm<sup>-1</sup>): 3422.89, 3360.99, 1631.56, 1537.20, 1487.97, 1402.70, 1384.20, 1045.63, 891.45; <sup>1</sup>H NMR (500 MHz, DMSO-*d*<sub>6</sub>) δ 8.38 (s, 1H), 7.40 (s, 2H), 7.07-7.39 (m, 4H), 6.73 (s, 2H), 2.91 (s, 6H), 2.25 (s, 3H); <sup>13</sup>C NMR (125 MHz, DMSO-*d*<sub>6</sub>) δ 159.7, 154.9, 136.1, 132.2, 130.3, 126.1, 125.7, 125.3, 37.5, 17.7; HRMS (ESI) *m/z* [M-I]<sup>+</sup> calcd for C<sub>11</sub>H<sub>18</sub>N<sub>5</sub> 220.1562, found 220.1565.

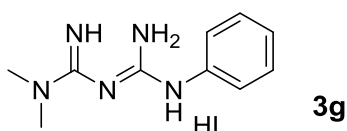

***N*-phenyl-dimethylbiguanide hydroiodide (3g)**

Yellow solid; mp: 168-169°C; IR (KBr, cm<sup>-1</sup>): 3345.46, 3198.33, 2921.70, 1634.49, 1587.18, 1549.85, 1415.50, 1381.24, 1048.22, 934.46, 756.77; <sup>1</sup>H NMR (500 MHz, DMSO-*d*<sub>6</sub>) δ 8.97 (s, 1H), 7.57 (s, 2H), 7.39-7.21 (m, 4H), 7.05 (t, *J* = 7.3 Hz, 1H), 6.64 (s, 2H), 2.96 (s, 6H); <sup>13</sup>C NMR (125 MHz, DMSO-*d*<sub>6</sub>) δ 160.1, 153.4, 138.6, 128.7, 123.2, 120.8, 37.7; HRMS (ESI) *m/z* [M-I]<sup>+</sup> calcd for C<sub>10</sub>H<sub>16</sub>N<sub>5</sub> 206.1406, found 206.1399.



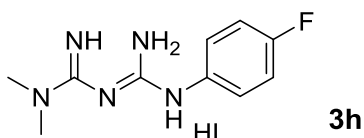

***N*-(4-fluorophenyl)-dimethylbiguanide hydroiodide (3h)**

Yellow solid; mp: 168-169°C; IR (KBr, cm<sup>-1</sup>): 3376.72, 3301.46, 2925.41, 1640.13, 1595.19, 1536.78, 1496.55, 1406.29, 1379.67, 1051.30, 842.41; <sup>1</sup>H NMR (500 MHz, DMSO-*d*<sub>6</sub>) δ 8.98 (s, 1H), 7.54 (s, 2H), 7.34-7.37 (m, 2H), 7.11-7.15 (m, 2H), 6.64 (s, 2H), 2.95 (s, 6H); <sup>13</sup>C NMR (125 MHz, DMSO-*d*<sub>6</sub>) δ 160.2, 158.3 (d, *J* = 226.9 Hz), 153.6, 134.9 (d, *J* = 1.8 Hz), 123.2 (d, *J* = 7.9 Hz), 115.3 (d, *J* = 22.5 Hz), 37.72; HRMS (ESI) *m/z* [M-I]<sup>+</sup> calcd for C<sub>10</sub>H<sub>15</sub>FN<sub>5</sub> 224.1311, found 224.1306.

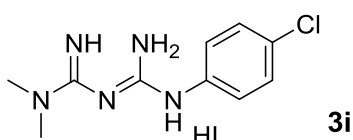

***N*-(4-chlorophenyl)-dimethylbiguanide hydroiodide (3i)**

Yellow solid; mp: 168-169°C; IR (KBr, cm<sup>-1</sup>): 3377.11, 3206.11, 2922.65, 1637.41, 1597.10, 1484.61, 1376.84, 1086.14, 834.77; <sup>1</sup>H NMR (500 MHz, DMSO-*d*<sub>6</sub>) δ 9.07 (s, 1H), 7.63 (s, 2H), 7.39 (d, *J* = 8.8 Hz, 2H), 7.35 (d, *J* = 8.8 Hz, 2H), 6.67 (s, 2H), 2.96 (s, 6H); <sup>13</sup>C NMR (125 MHz, DMSO-*d*<sub>6</sub>) δ 160.2, 153.0, 137.7, 128.5, 126.8, 122.2, 37.6; HRMS (ESI) *m/z* [M-I]<sup>+</sup> calcd for C<sub>10</sub>H<sub>15</sub>ClN<sub>5</sub> 240.1016, found 240.1011.

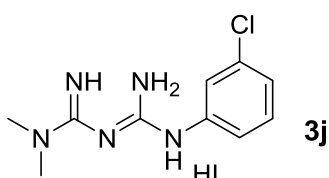

***N*-(3-chlorophenyl)-dimethylbiguanide hydroiodide (3j)**

Yellow solid; mp: 225-226°C; IR (KBr, cm<sup>-1</sup>): 3345.10, 3197.02, 3125.67, 1634.71, 1599.66, 1582.43, 1539.95, 1416.99, 1376.01, 1049.72, 949.85; <sup>1</sup>H NMR (500 MHz, DMSO-*d*<sub>6</sub>) δ 9.12 (s, 1H), 7.68 (s, 2H), 7.57 (s, 1H), 7.29-7.34 (m, 1H), 7.24 (d, *J* = 8.0 Hz, 2H), 7.08 (d, *J* = 8.0 Hz, 1H), 6.70 (s, 2H), 2.92 (s, 6H); <sup>13</sup>C NMR (125 MHz, DMSO-*d*<sub>6</sub>) δ 160.3, 152.7, 140.4, 132.9, 130.2, 122.6, 119.9, 118.8, 37.7; HRMS (ESI) *m/z* [M-I]<sup>+</sup> calcd for C<sub>10</sub>H<sub>15</sub>ClN<sub>5</sub> 240.1016, found 240.1011.

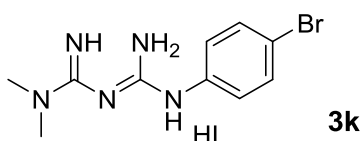

***N*-(4-bromophenyl)-dimethylbiguanide hydroiodide (3k)**

Yellow solid; mp: 236-237°C; IR (KBr, cm<sup>-1</sup>): 3411.59, 3295.95, 3188.29, 1615.58,

530.72, 1479.56, 1401.73, 1286.09, 1048.19, 831.22;  $^1\text{H NMR}$  (500 MHz,  $\text{DMSO-}d_6$ )  $\delta$  9.11 (s, 1H), 7.64 (s, 2H), 7.47 (d,  $J = 8.5$  Hz, 2H), 7.34 (d,  $J = 8.5$  Hz, 2H), 6.69 (s, 2H), 2.96 (s, 6H);  $^{13}\text{C NMR}$  (125 MHz,  $\text{DMSO-}d_6$ )  $\delta$  160.2, 153.0, 138.2, 131.4, 122.5, 114.8, 37.7; HRMS (ESI)  $m/z$   $[\text{M-I}]^+$  calcd for  $\text{C}_{10}\text{H}_{15}\text{BrN}_5$  284.0511, found 284.0507.

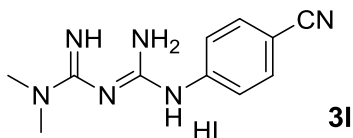

***N*-(4-cyanophenyl)-dimethylbiguanide hydroiodide (3i)**

Yellow solid; mp: 236-237°C; IR (KBr,  $\text{cm}^{-1}$ ): 3379.63, 3297.74, 2926.87, 2218.26, 1637.21, 1572.67, 1523.88, 1408.49, 1377.86, 1112.62, 941.96;  $^1\text{H NMR}$  (500 MHz,  $\text{DMSO-}d_6$ )  $\delta$  9.41 (s, 1H), 7.79 (s, 2H), 7.74 (d,  $J = 8.7$  Hz, 2H), 7.58 (d,  $J = 8.7$  Hz, 2H), 6.78 (s, 2H), 2.98 (s, 6H);  $^{13}\text{C NMR}$  (125 MHz,  $\text{DMSO-}d_6$ )  $\delta$  160.4, 152.0, 143.5, 133.0, 119.7, 119.1, 104.1, 37.8; HRMS (ESI)  $m/z$   $[\text{M-I}]^+$  calcd for  $\text{C}_{11}\text{H}_{15}\text{N}_6$  231.1358, found 231.1358.

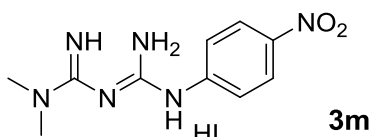

***N*-(4-nitrophenyl)-dimethylbiguanide hydroiodide (3m)**

Yellow solid; mp: 219-220°C; IR (KBr,  $\text{cm}^{-1}$ ): 3421.64, 3075.92, 1634.00, 1549.05, 1505.03, 1406.95, 1384.27, 1108.01;  $^1\text{H NMR}$  (500 MHz,  $\text{DMSO-}d_6$ )  $\delta$  9.63 (s, 1H), 8.19 (d,  $J = 9.2$  Hz, 2H), 7.85 (s, 2H), 7.65 (d,  $J = 9.2$  Hz, 2H), 6.84 (s, 2H), 3.00 (s, 6H);  $^{13}\text{C NMR}$  (125 MHz,  $\text{DMSO-}d_6$ )  $\delta$  160.5, 151.8, 145.7, 141.6, 124.8, 119.1, 37.8; HRMS (ESI)  $m/z$   $[\text{M-I}]^+$   $\text{C}_{10}\text{H}_{15}\text{N}_6\text{O}_2$  251.1256, found 251.1253.

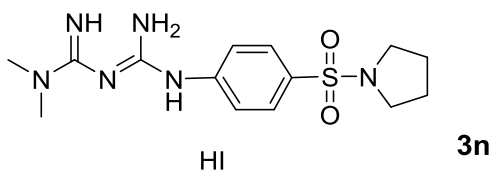

***N*-(4-(pyrrolidin-1-ylsulfonyl)phenyl)-dimethylbiguanide hydroiodide (3n)**

Yellow solid; mp: 225-226°C; IR (KBr,  $\text{cm}^{-1}$ ): 3373.98, 3294.60, 3194.54, 1631.60, 1571.95, 1522.20, 1427.74, 1377.26, 1338.24, 1241.62, 1067.31, 711.90;  $^1\text{H NMR}$  (500 MHz,  $\text{DMSO-}d_6$ )  $\delta$  9.40 (s, 1H), 7.77 (s, 2H), 7.72 (d,  $J = 8.7$  Hz, 2H), 7.62 (d,  $J = 8.7$  Hz, 2H), 6.77 (s, 2H), 3.11 (t,  $J = 6.5$  Hz, 4H), 2.99 (s, 6H), 1.64 (t,  $J = 6.5$  Hz, 4H);  $^{13}\text{C NMR}$  (125 MHz,  $\text{DMSO-}d_6$ )  $\delta$  160.4, 152.3, 143.3, 129.4, 128.4, 119.4, 47.7, 37.7, 24.7; HRMS (ESI)  $m/z$   $[\text{M-I}]^+$  calcd for  $\text{C}_{14}\text{H}_{23}\text{N}_6\text{O}_2\text{S}$  339.1603, found 339.1603.

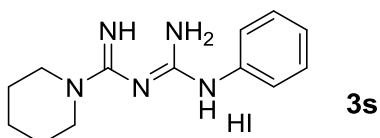

***N*-(amino(phenylamino)methylene)piperidine-1-carboximidamide hydroiodide (3s)**

Yellow solid; mp: 207-208 °C; IR (KBr, cm<sup>-1</sup>): 3203.69, 3128.73, 1631.34, 1578.22, 1542.40, 1446.38, 1382.24, 1295.83, 1101.09, 753.52; <sup>1</sup>H NMR (500 MHz, DMSO-*d*<sub>6</sub>) δ 8.99 (s, 1H), 7.62 (s, 2H), 7.29-7.36 (m, 4H), 7.03-7.07 (m, 1H), 6.69 (s, 2H), 3.43 (t, *J* = 5.2 Hz, 4H), 1.54-1.60 (m, 6H); <sup>13</sup>C NMR (125 MHz, DMSO-*d*<sub>6</sub>) δ 158.3, 153.9, 138.6, 128.7, 123.3, 120.9, 45.9, 25.0, 23.4; HRMS (ESI) *m/z* [M-I]<sup>+</sup> calcd for C<sub>13</sub>H<sub>21</sub>N<sub>5</sub> 246.1719, found 246.1723.

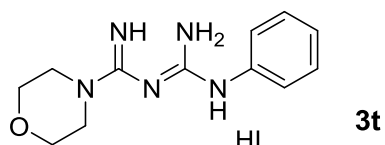

**2-[imino(morpholino)methyl]-1-phenylguanidine hydroiodide (3t)**

Yellow solid; mp: 186-187 °C; IR (KBr, cm<sup>-1</sup>): 3406.89, 3303.83, 3196.52, 1632.72, 1537.59, 1487.44, 1444.11, 1383.91, 1121.80, 1006.53, 759.57; <sup>1</sup>H NMR (500 MHz, DMSO-*d*<sub>6</sub>) δ 9.13 (s, 1H), 7.71 (s, 2H), 7.33-7.29 (m, 4H), 7.07 (s, 1H), 6.84 (s, 2H), 3.63 (t, *J* = 4.7 Hz, 4H), 3.44 (t, *J* = 4.7 Hz, 4H); <sup>13</sup>C NMR (125 MHz, DMSO-*d*<sub>6</sub>) δ 158.8, 154.6, 138.2, 128.7, 123.6, 121.2, 65.3, 45.0; HRMS (ESI) *m/z* [M-I]<sup>+</sup> calcd for C<sub>12</sub>H<sub>18</sub>N<sub>5</sub>O 248.1511, found 248.1509.

**General Procedure for Synthesis of biguanide hydrobromides:**

To a mixture of biguanide hydrochloride (1.0 mmol), aryl bromide (1.0 mmol), 2-(pyridin-2-yl)pyridine (0.2 mmol), and K<sub>2</sub>CO<sub>3</sub> (6.0 mmol) in dioxane (5 mmol), was added CuI (10 mol %). The resulting mixture was then sealed and stirred for 12 h at 110 °C. After completion, the reaction mixture was filtered and the precipitates were washed with methanol. The mixture was evaporated under vacuum, and the residue was purified by flash chromatography with CH<sub>2</sub>Cl<sub>2</sub> and CH<sub>3</sub>OH (3:1) as the eluent to give the pure product.

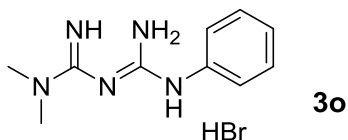

***N*-phenyl-dimethylbiguanide hydrobromide (3o)**

White solid; mp: 239-240°C; IR (KBr, cm<sup>-1</sup>): 3422.24, 1637.21, 1587.56, 1551.56, 1488.87, 1383.99, 1261.09, 1047.83, 757.24. <sup>1</sup>H NMR (500 MHz, DMSO-*d*<sub>6</sub>) δ 9.46 (s, 1H), 7.62 (s, 2H), 6.98 - 7.44 (m, 5H), 6.81 (s, 2H), 2.97 (s, 6H); <sup>13</sup>C NMR (125 MHz, DMSO-*d*<sub>6</sub>) δ 160.2, 153.4, 138.9, 128.6, 122.9, 120.4, 37.7; HRMS (ESI) *m/z* [M-Br]<sup>+</sup> calcd for C<sub>10</sub>H<sub>16</sub>N<sub>5</sub> 206.1406, found 206.1403.

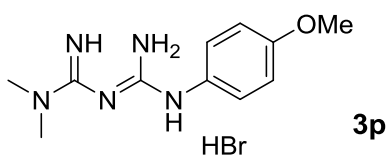

***N*-(4-methoxyphenyl)-dimethylbiguanide hydrobromide (3p)**

White solid; mp: 205-206°C; IR (KBr, cm<sup>-1</sup>): 3410.23, 3340.57, 3176.18, 1633.76, 1592.42, 1556.73, 1513.30, 1240.26, 1033.23, 831.01; <sup>1</sup>H NMR (500 MHz, DMSO-*d*<sub>6</sub>) δ 9.53 (s, 1H), 7.52 (s, 2H), 7.27 (d, *J* = 8.9 Hz, 2H), 6.87 (d, *J* = 8.9 Hz, 2H), 6.83 (s, 1H), 6.74 (s, 1H), 3.71 (s, 3H), 2.95 (s, 6H); <sup>13</sup>C NMR (125 MHz, DMSO-*d*<sub>6</sub>) δ 160.0, 155.5, 154.3, 131.7, 122.7, 113.8, 55.2, 37.6; HRMS (ESI) *m/z* [M-Br]<sup>+</sup> calcd for C<sub>11</sub>H<sub>18</sub>N<sub>5</sub>O 236.1511, found 236.1515. Anal. Calcd for C<sub>11</sub>H<sub>18</sub>BrN<sub>5</sub>O: C, 41.78; H, 5.74; N, 22.15 Found: C, 41.77; H, 5.78; N, 22.11.

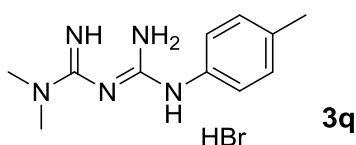

***N*-(4-methylphenyl)-dimethylbiguanide hydrobromide (3q)**

White solid; mp: 240-241°C; IR (KBr, cm<sup>-1</sup>): 3422.23, 1633.96, 1540.93, 1486.07, 1414.87, 1383.81, 1121.80, 1049.57, 813.90; <sup>1</sup>H NMR (500 MHz, DMSO-*d*<sub>6</sub>) δ 9.33 (s, 1H), 7.56 (s, 2H), 7.26 (d, *J* = 8.3 Hz, 2H), 7.10 (d, *J* = 8.3 Hz, 2H), 6.76 (s, 2H), 2.96 (s, 6H), 2.25 (s, 3H); <sup>13</sup>C NMR (125 MHz, DMSO-*d*<sub>6</sub>) δ 160.1, 153.7, 136.2, 132.1, 129.0, 120.8, 37.6, 20.4; HRMS (ESI) *m/z* [M-Br]<sup>+</sup> calcd for C<sub>11</sub>H<sub>18</sub>N<sub>5</sub> 220.1562, found 220.1559.

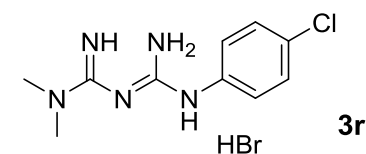

***N*-(4-chlorophenyl)-dimethylbiguanide hydrobromide (3r)**

Yellow solid; mp: 244-245°C; IR (KBr, cm<sup>-1</sup>): 3406.78, 1633.08, 1544.34, 1484.95, 1383.80, 1091.24, 809.72; <sup>1</sup>H NMR (500 MHz, DMSO-*d*<sub>6</sub>) δ 9.79 (s, 1H), 7.68 (s, 2H), 7.42

(d,  $J = 8.9$  Hz, 2H), 7.38 (d,  $J = 8.9$  Hz, 2H), 6.87 (s, 2H), 2.97 (s, 6H);  $^{13}\text{C}$  NMR (125 MHz, DMSO- $d_6$ )  $\delta$  160.3, 153.1, 138.1, 128.5, 126.4, 121.6, 37.7; HRMS (ESI)  $m/z$  [M-Br] $^+$  calcd for  $\text{C}_{10}\text{H}_{15}\text{ClN}_5$  240.1016, found 240.1020

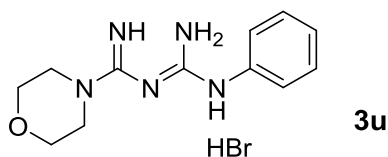

**2-(imino(morpholino)methyl)-1-phenylguanidine hydrobromide (3u)**

Yellow solid; mp: 227-228°C; IR (KBr,  $\text{cm}^{-1}$ ): 3423.71, 1631.82, 1536.34, 1489.41, 1445.79, 1115.21, 1006.08, 758.31;  $^1\text{H}$  NMR (500 MHz, DMSO- $d_6$ )  $\delta$  9.41 (s, 1H), 7.75 (s, 2H), 7.29-7.36 (m, 4H), 7.06 (t,  $J = 7.1$  Hz, 1H), 6.93 (s, 2H), 3.60-3.68 (m, 4H), 3.42-3.50 (m, 4H);  $^{13}\text{C}$  NMR (125 MHz, DMSO- $d_6$ )  $\delta$  158.9, 154.6, 138.5, 128.7, 123.4, 120.9, 65.3, 45.1; IR (KBr,  $\text{cm}^{-1}$ ): 3423.71, 1631.82, 1536.34, 1489.41, 1445.79, 1115.21, 1006.08, 758.31. HRMS (ESI)  $m/z$  [M-Br] $^+$  calcd for  $\text{C}_{12}\text{H}_{18}\text{N}_5\text{O}$  248.1511, found 248.1516.

130105  
BAQ121212 DMSO

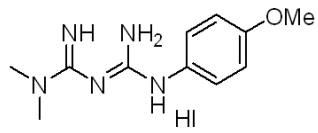

3a

8.8345

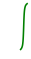

7.4577

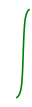

7.2465

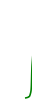

7.2285

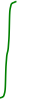

6.9019

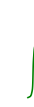

6.8839

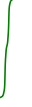

6.6209

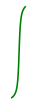

3.7255

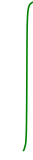

3.3608

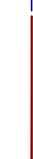

2.9398

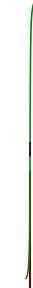

2.5152

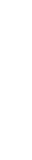

2.5118



2.5083

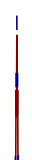

2.5047

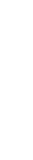

2.5013



1.05

2.00

2.17

2.21

2.06

3.35

6.25

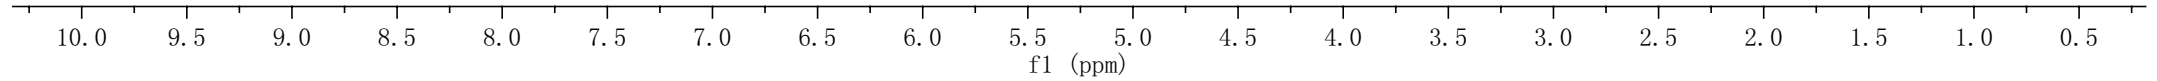

130514  
BAQ140423 DMSO

159.8823  
155.8306  
154.2599

131.1284

123.5116

113.9177

55.2351

40.0225  
39.8557  
39.6886  
39.5216  
39.3547  
39.1876  
39.0208  
37.5713

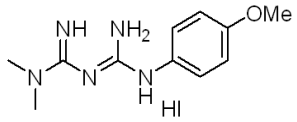

**3a**

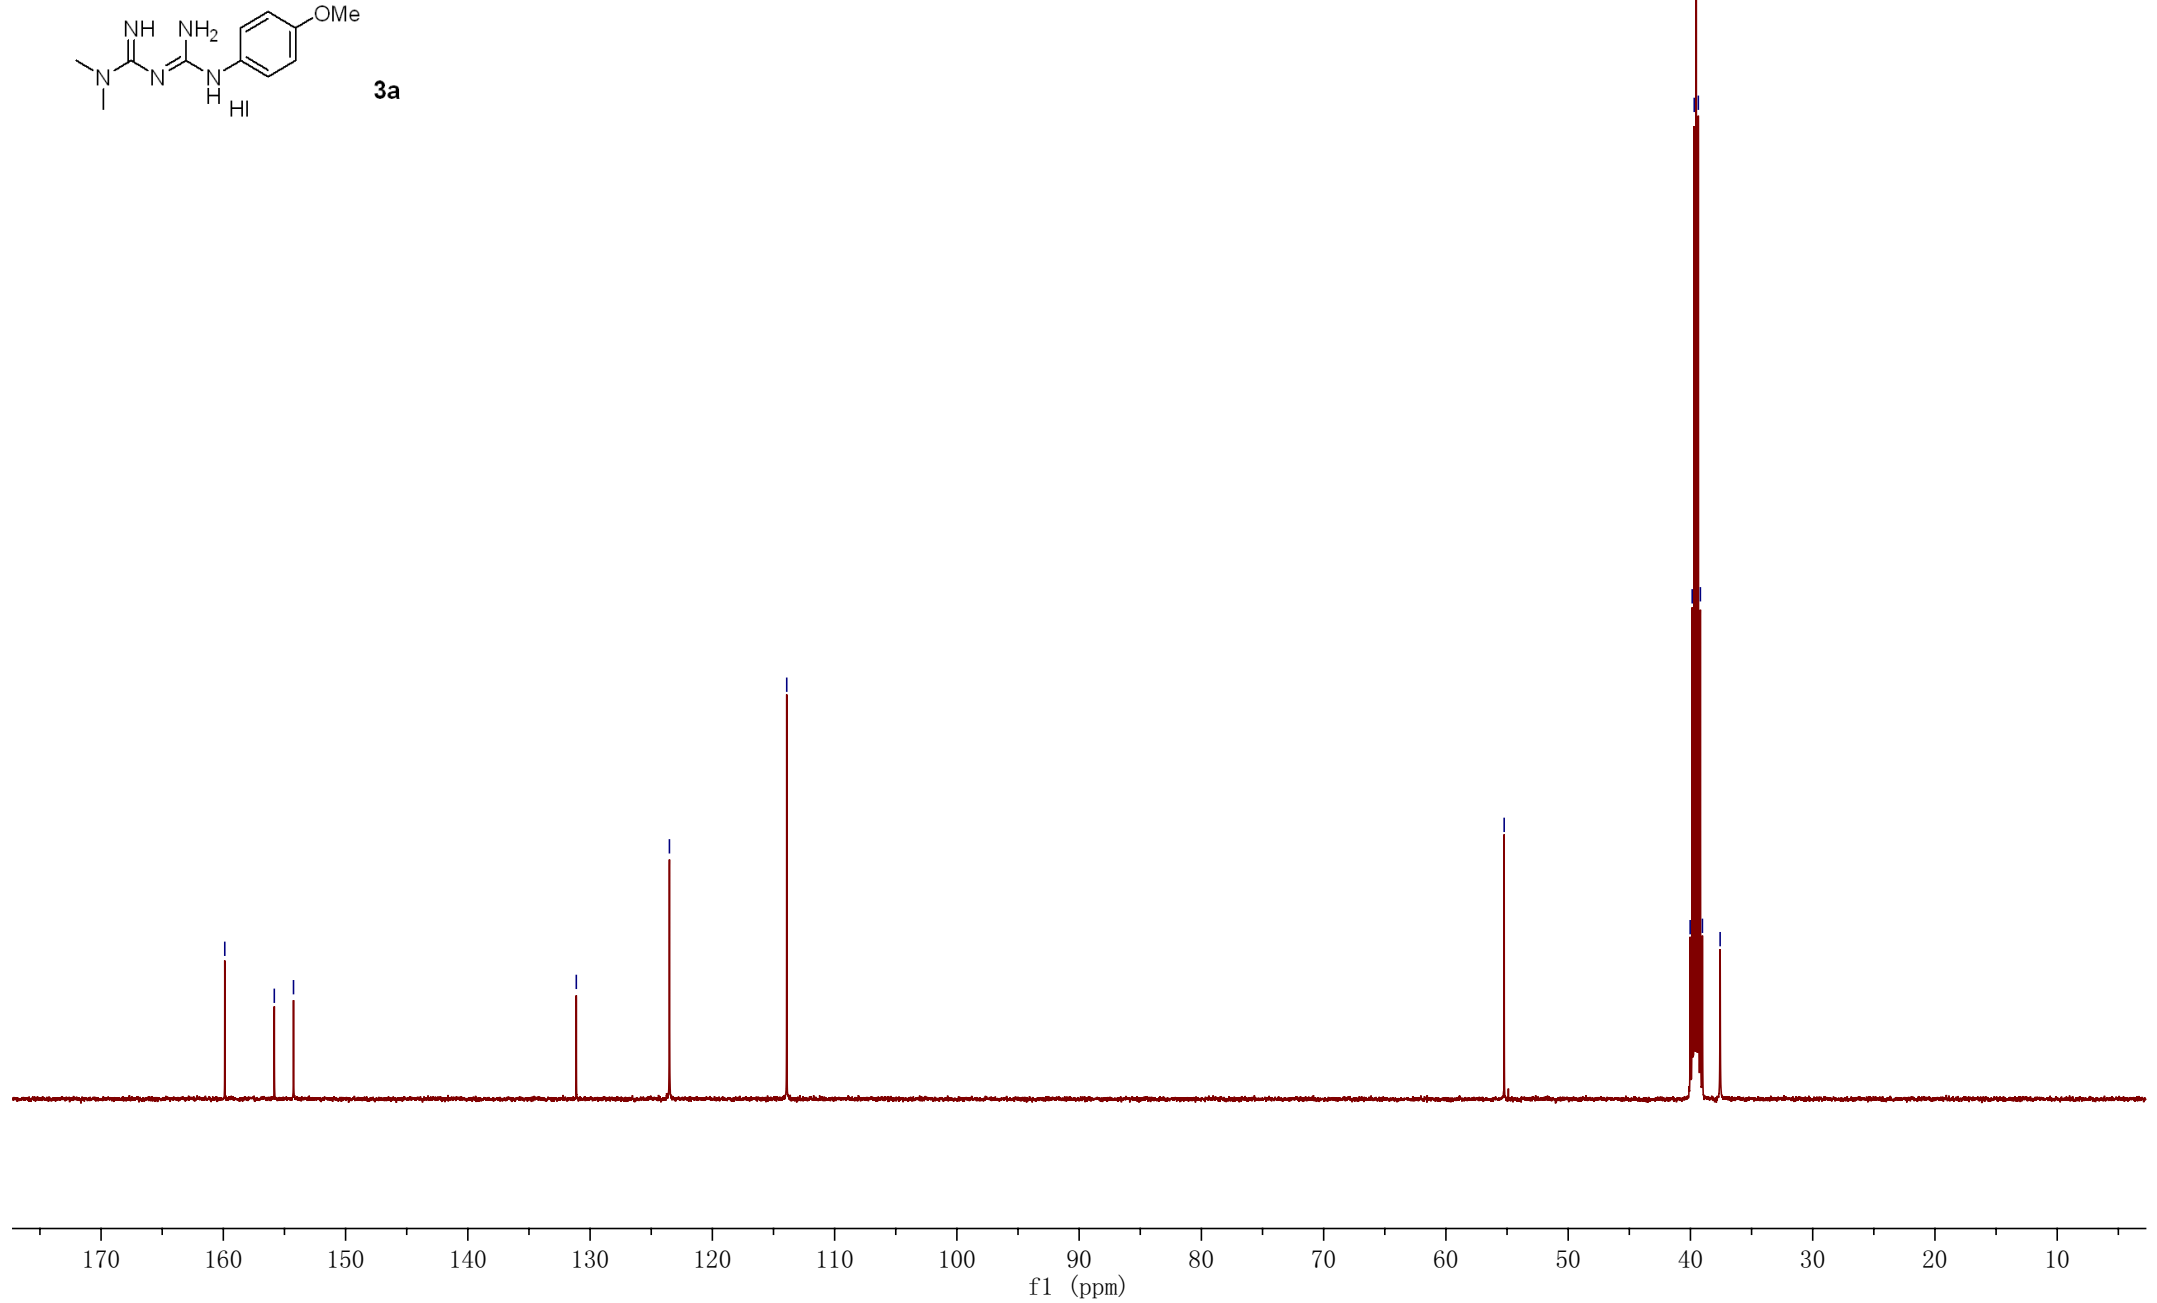

130725  
BAQ130715 DMSO

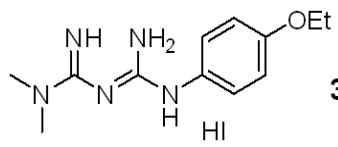

8.7982

7.4324

7.2292

7.2125

6.8782

6.8614

6.5897

3.9848

3.9715

3.3665

2.9376

2.5090

1.3147

1.3017

1.2887

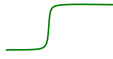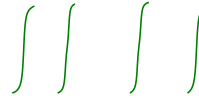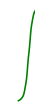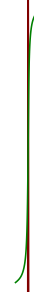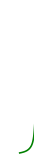

1.00

1.92

1.96

2.00

1.92

2.10

6.13

3.31

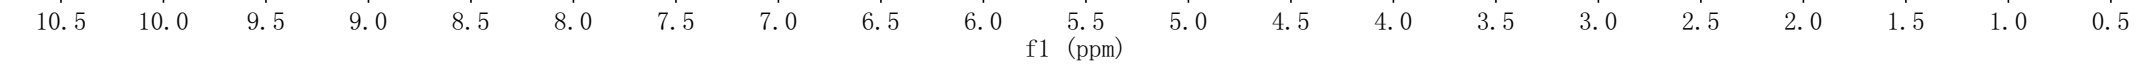



130827  
BAQ130715 DMSO

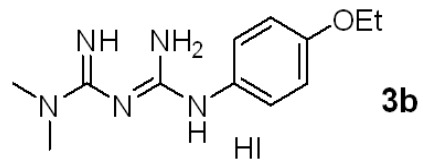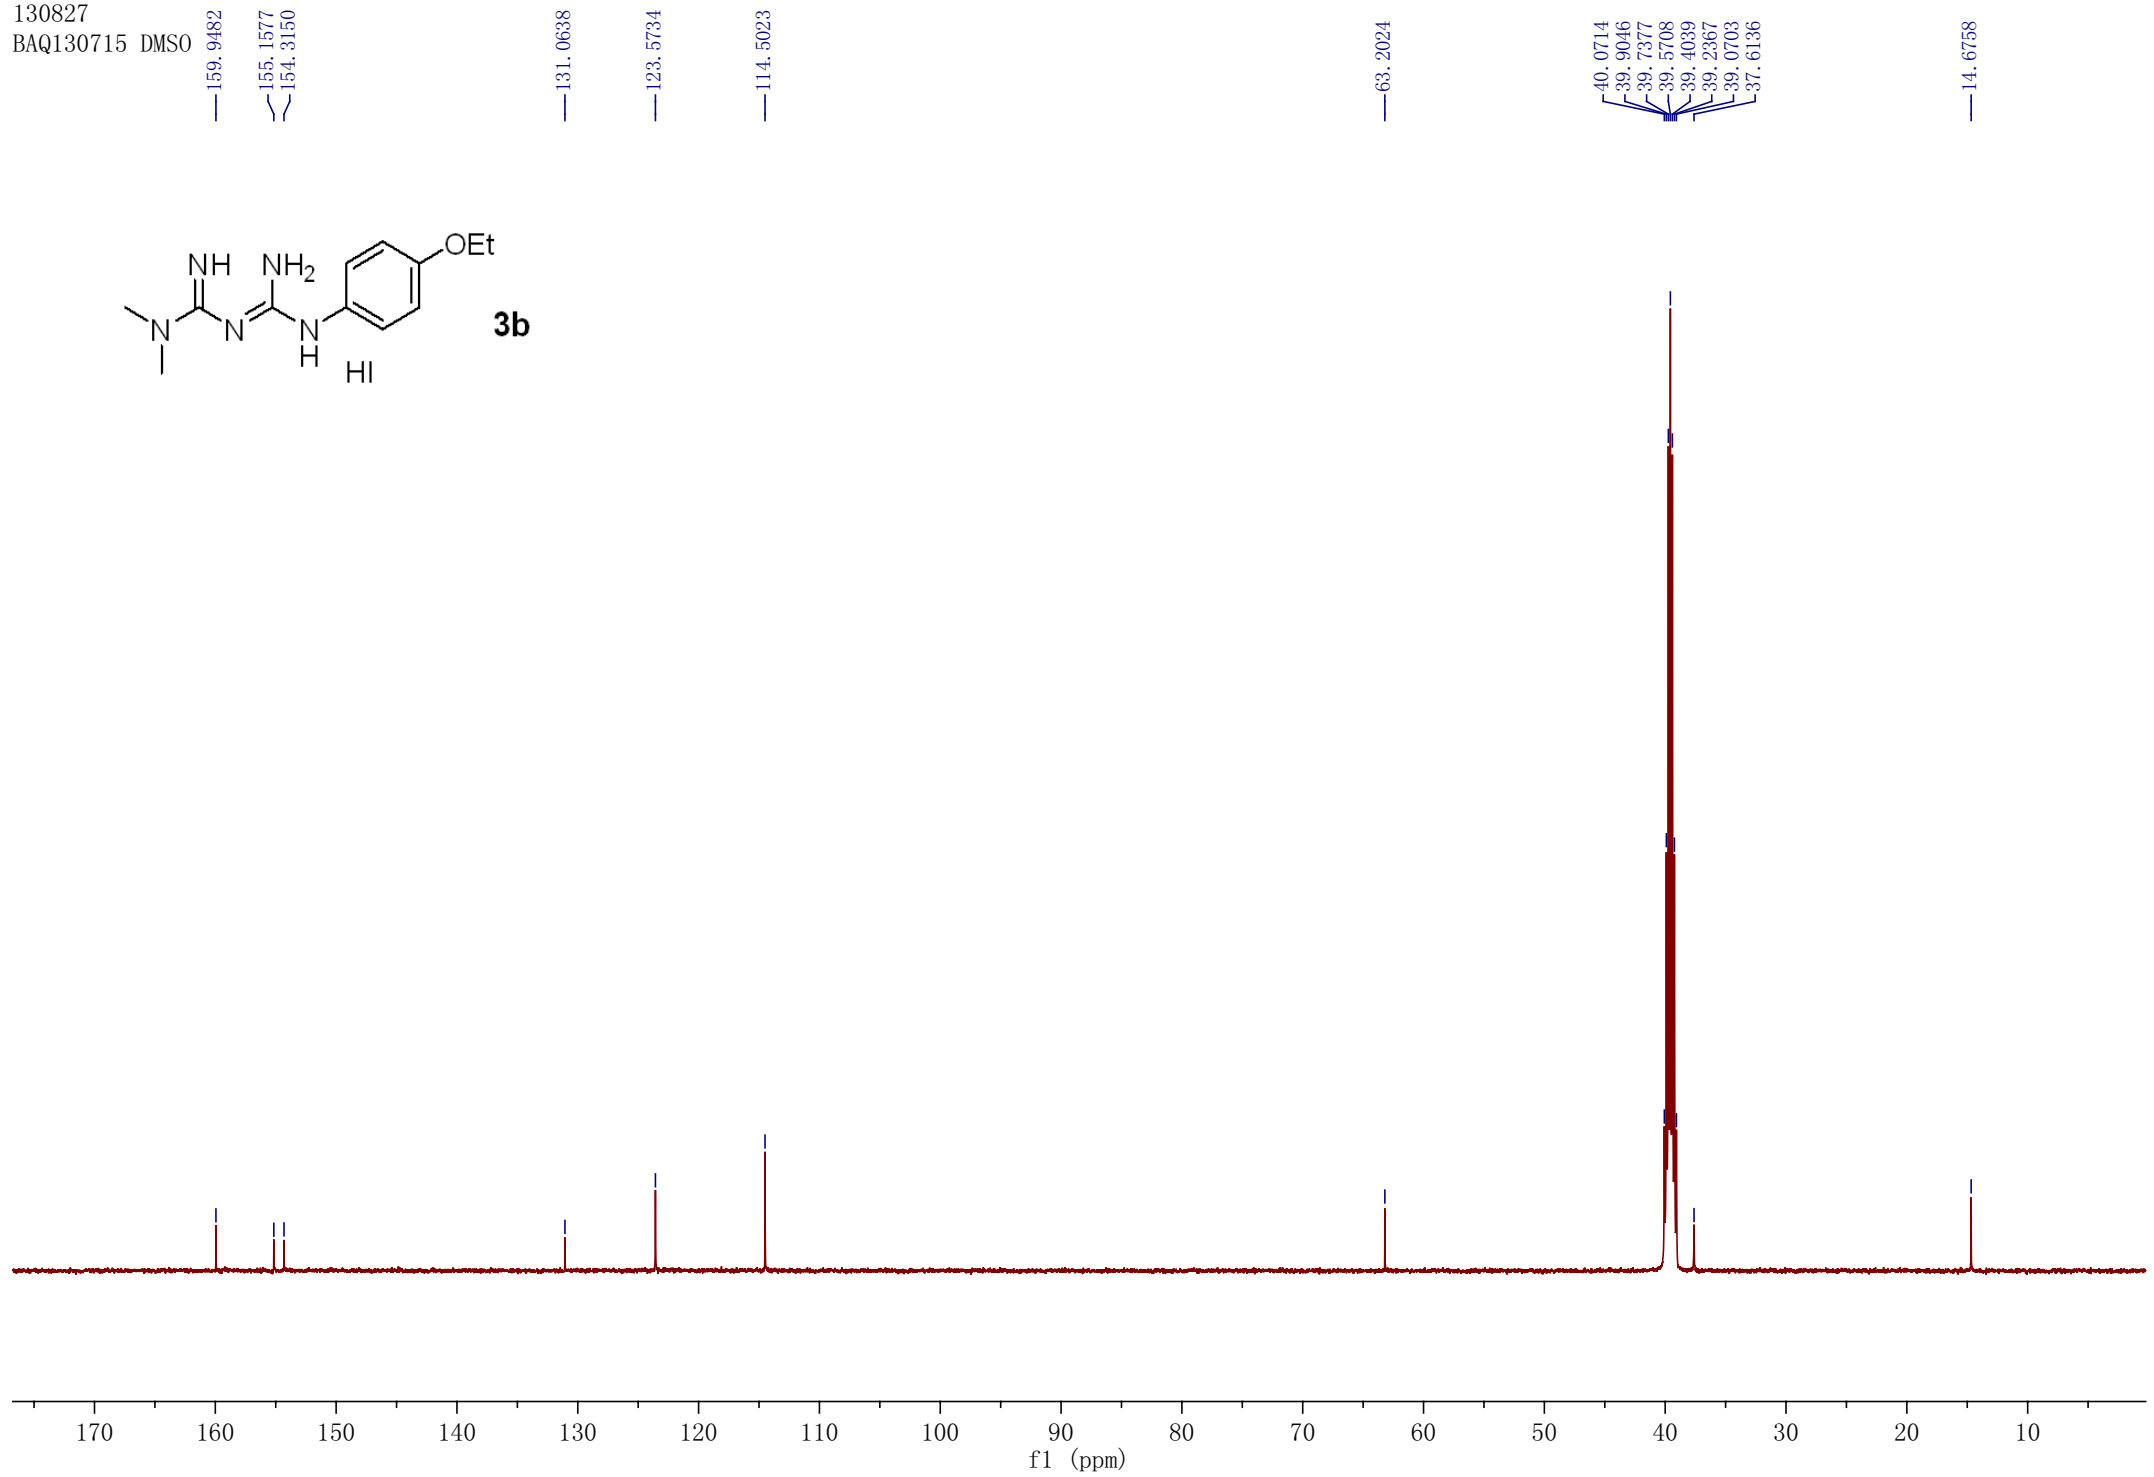

BAQ131214  
BAQ131214 DMSO

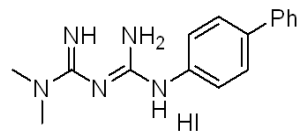

**3c**

9.0856

7.6458  
7.6298  
7.6124  
7.4687  
7.4512  
7.4326  
7.3467  
7.3321  
7.3176

6.6910

3.3573

2.9845

2.5082

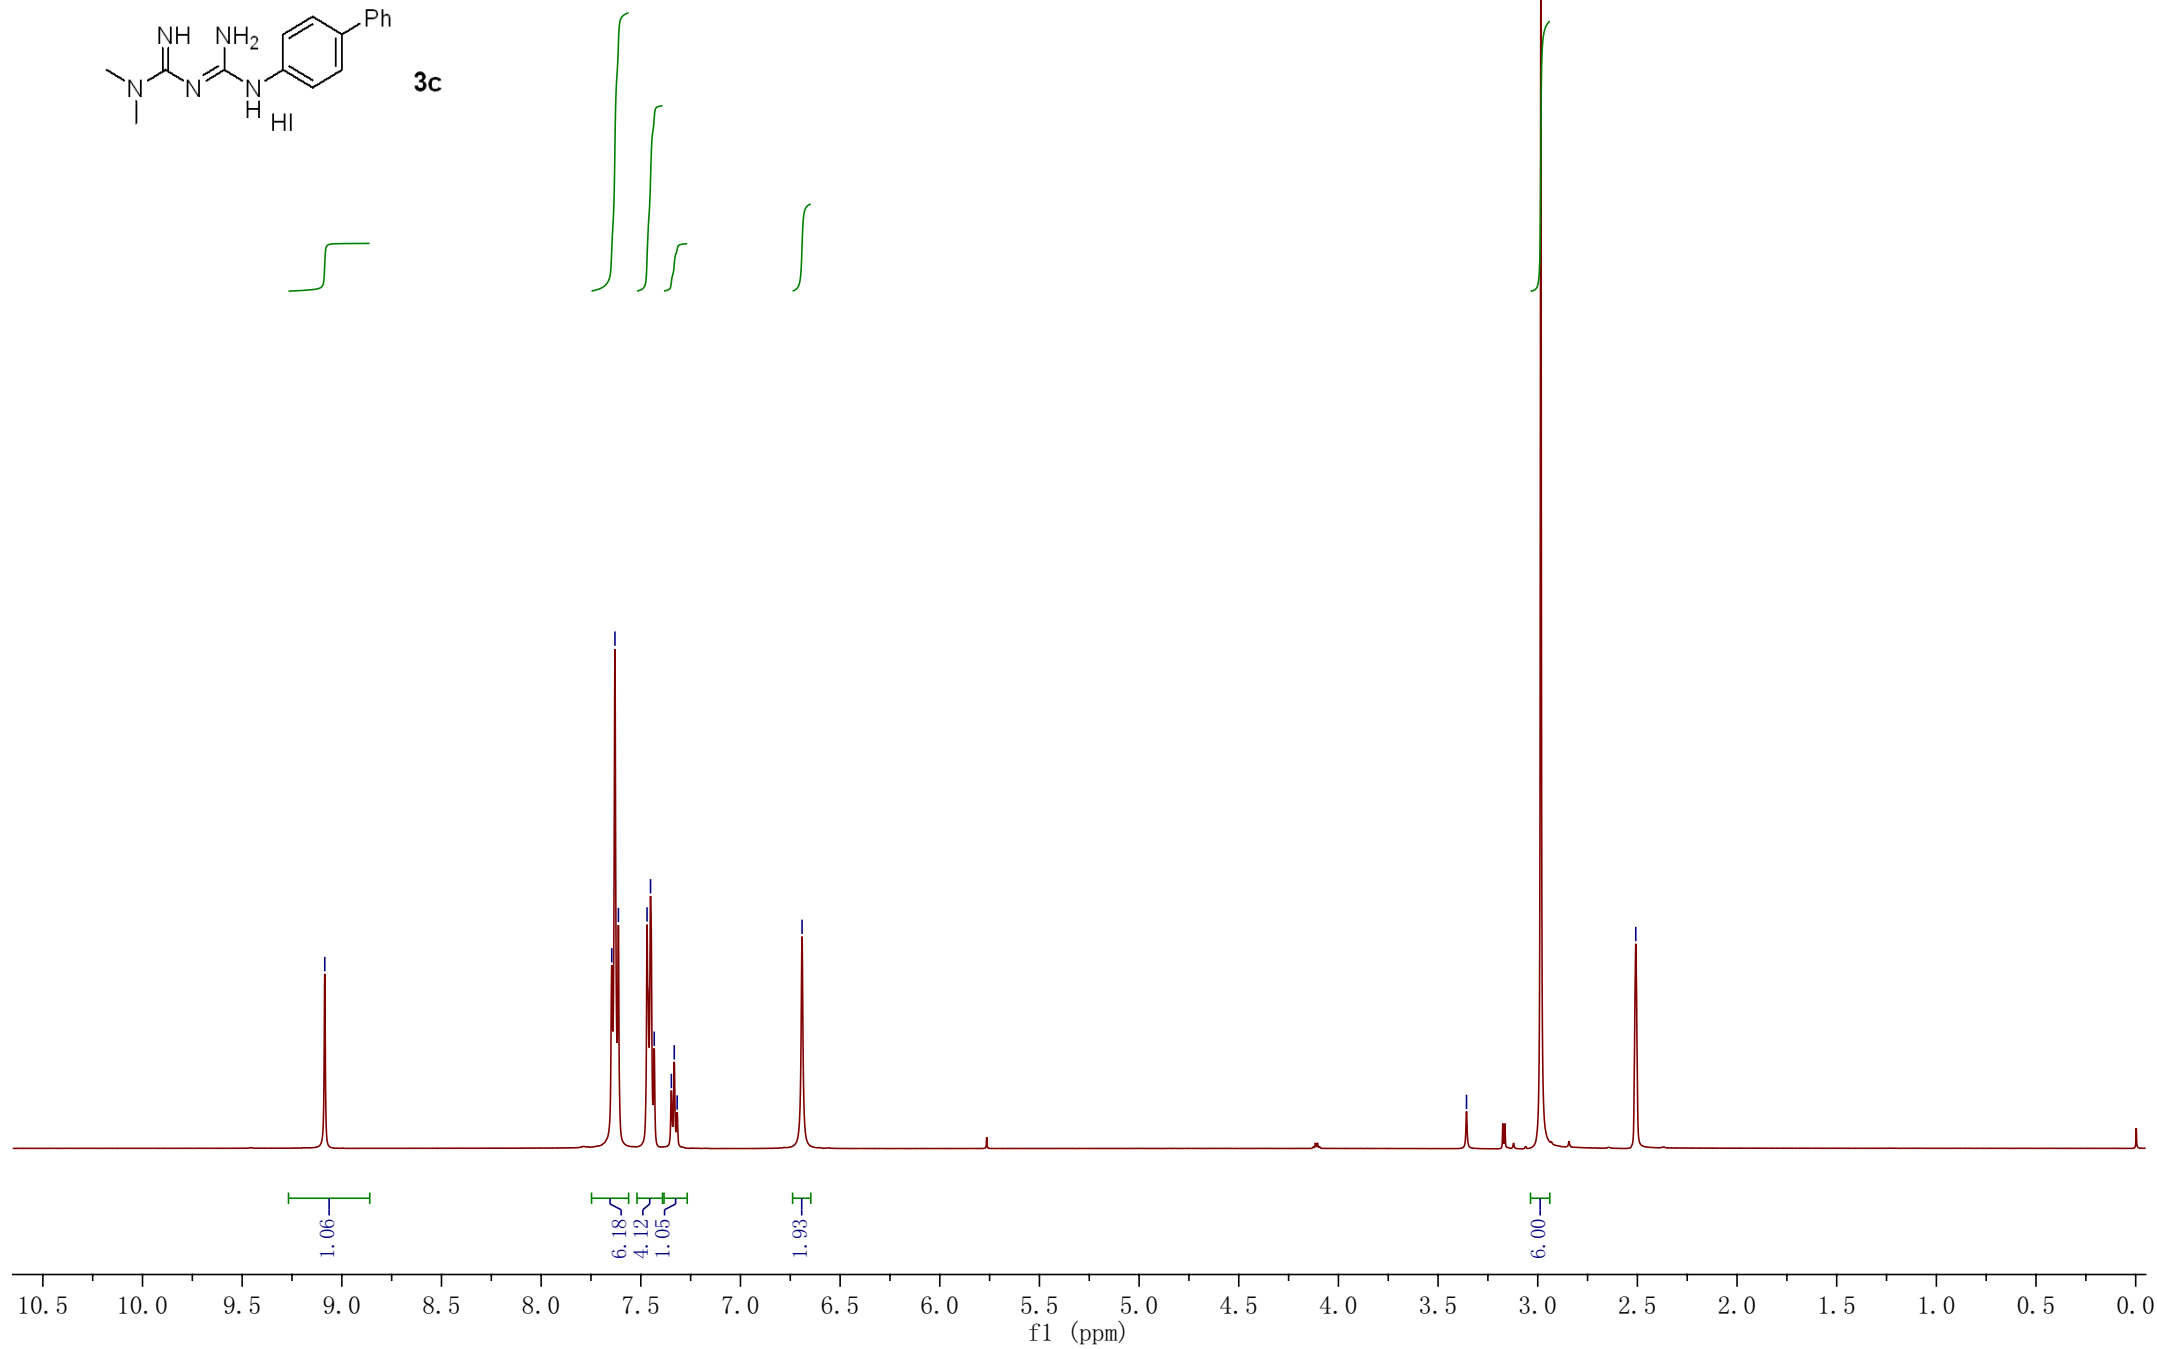

131230  
BAQ131214 DMSO

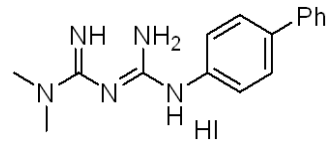

**3c**

160.2021

153.2100

139.5502

138.1562

134.8270

128.8408

126.9866

126.8178

126.1767

121.0213

40.0129

39.8462

39.6793

39.5124

39.3454

39.1786

39.0115

37.6486

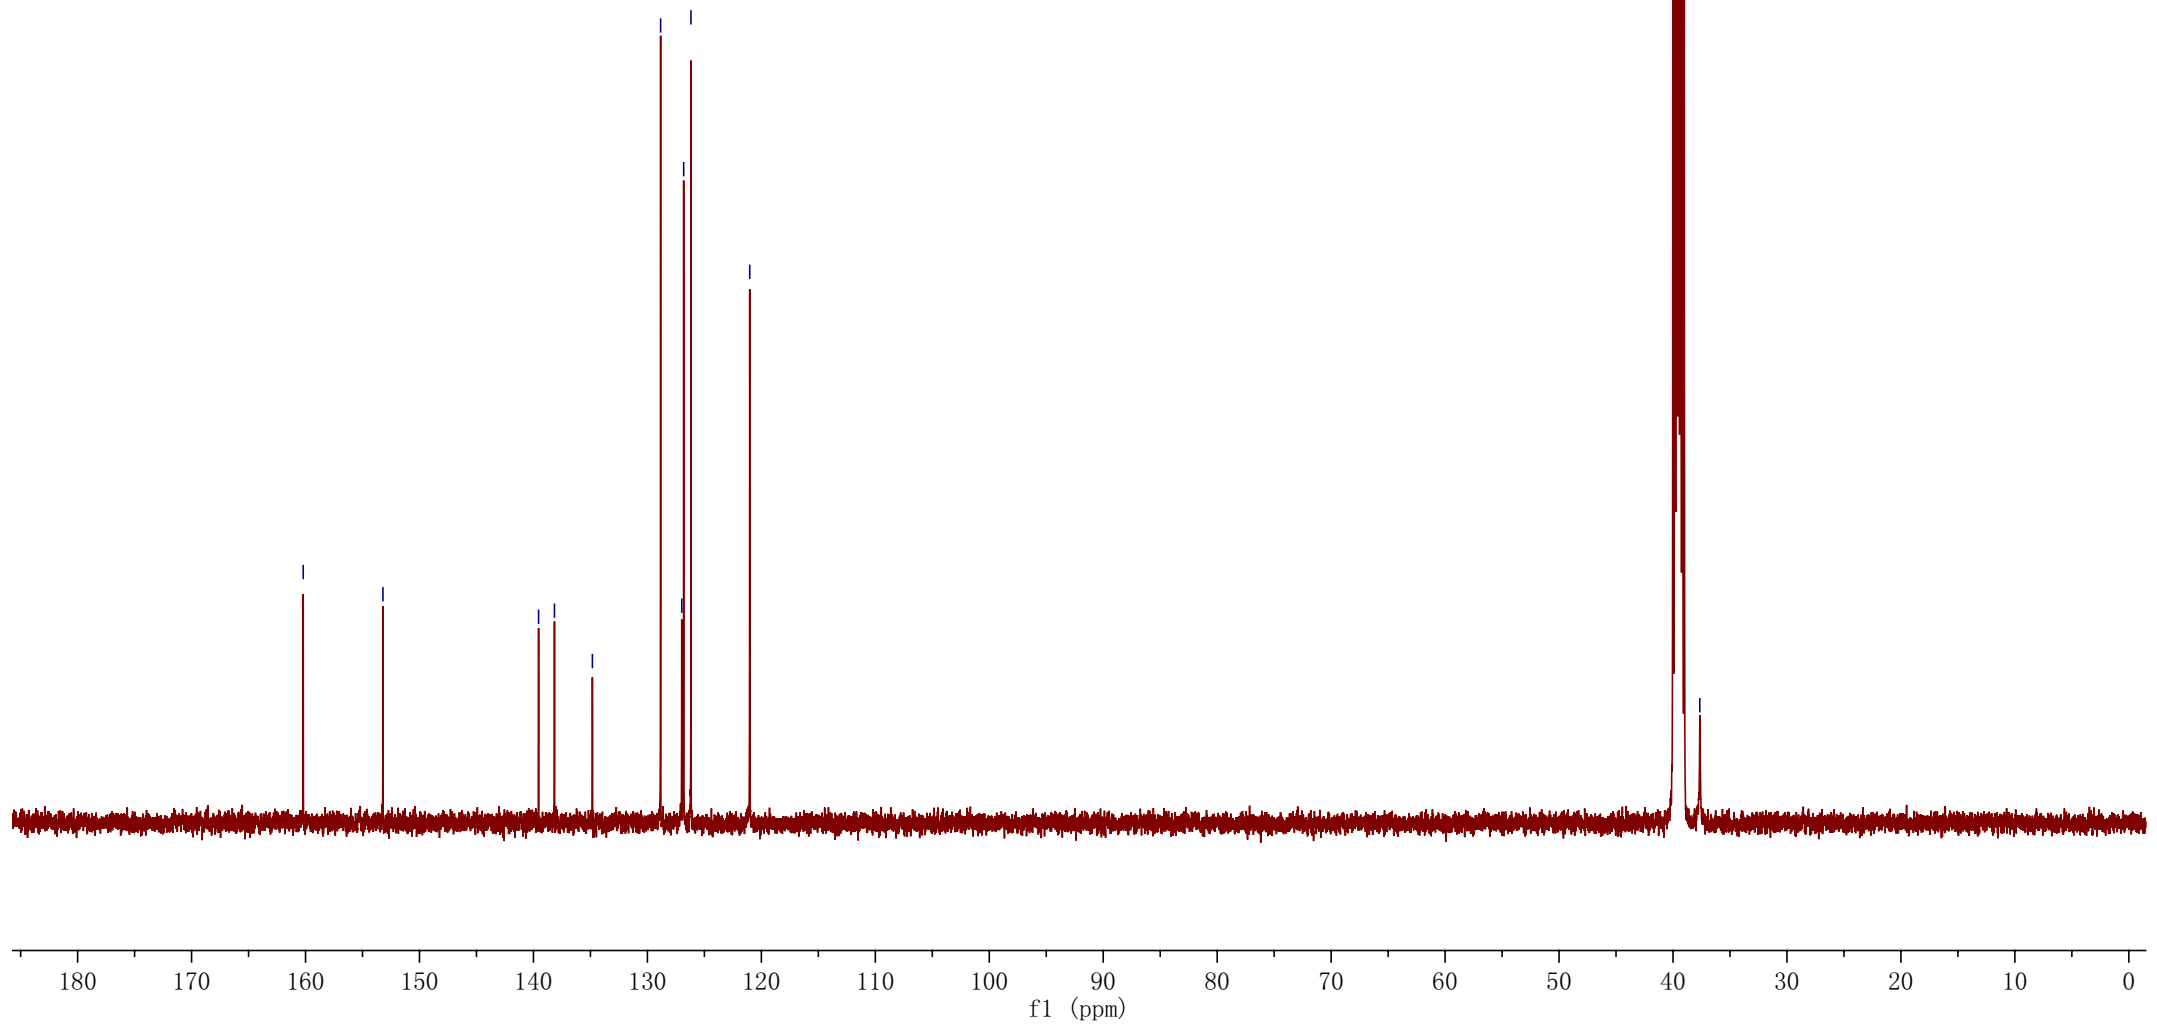

130826  
BAQ130823 DMSO

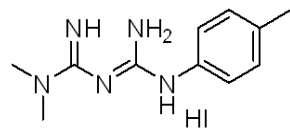

**3d**

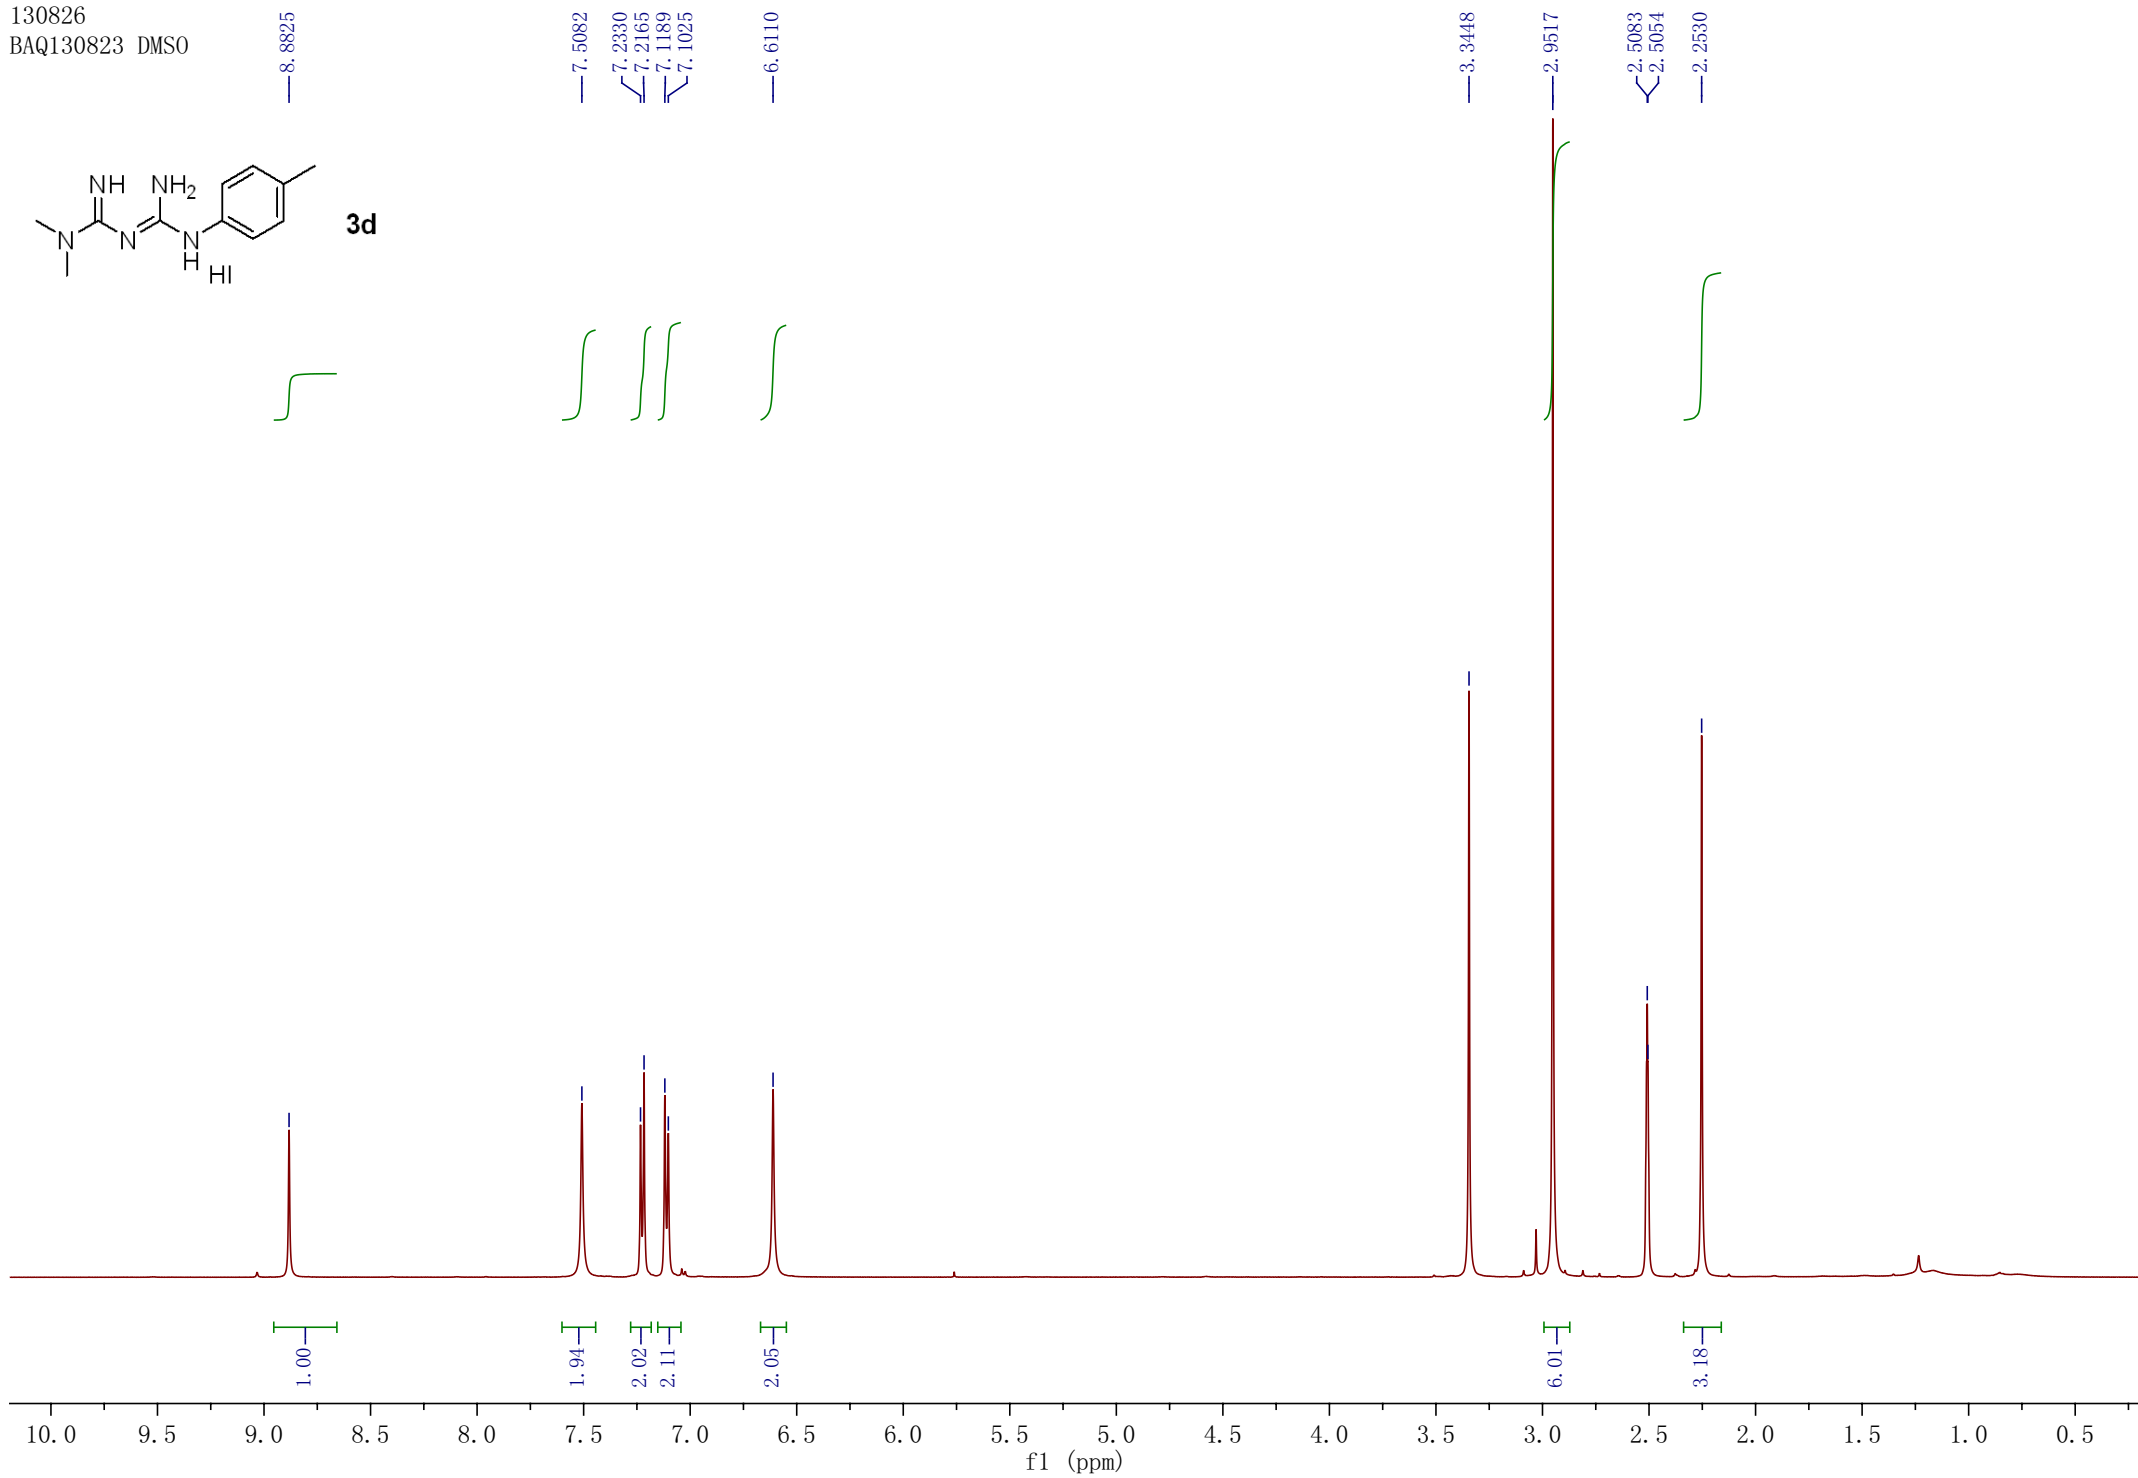

140312  
BAQ130823 DMSO

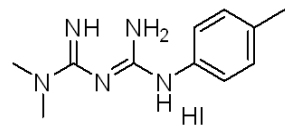

**3d**

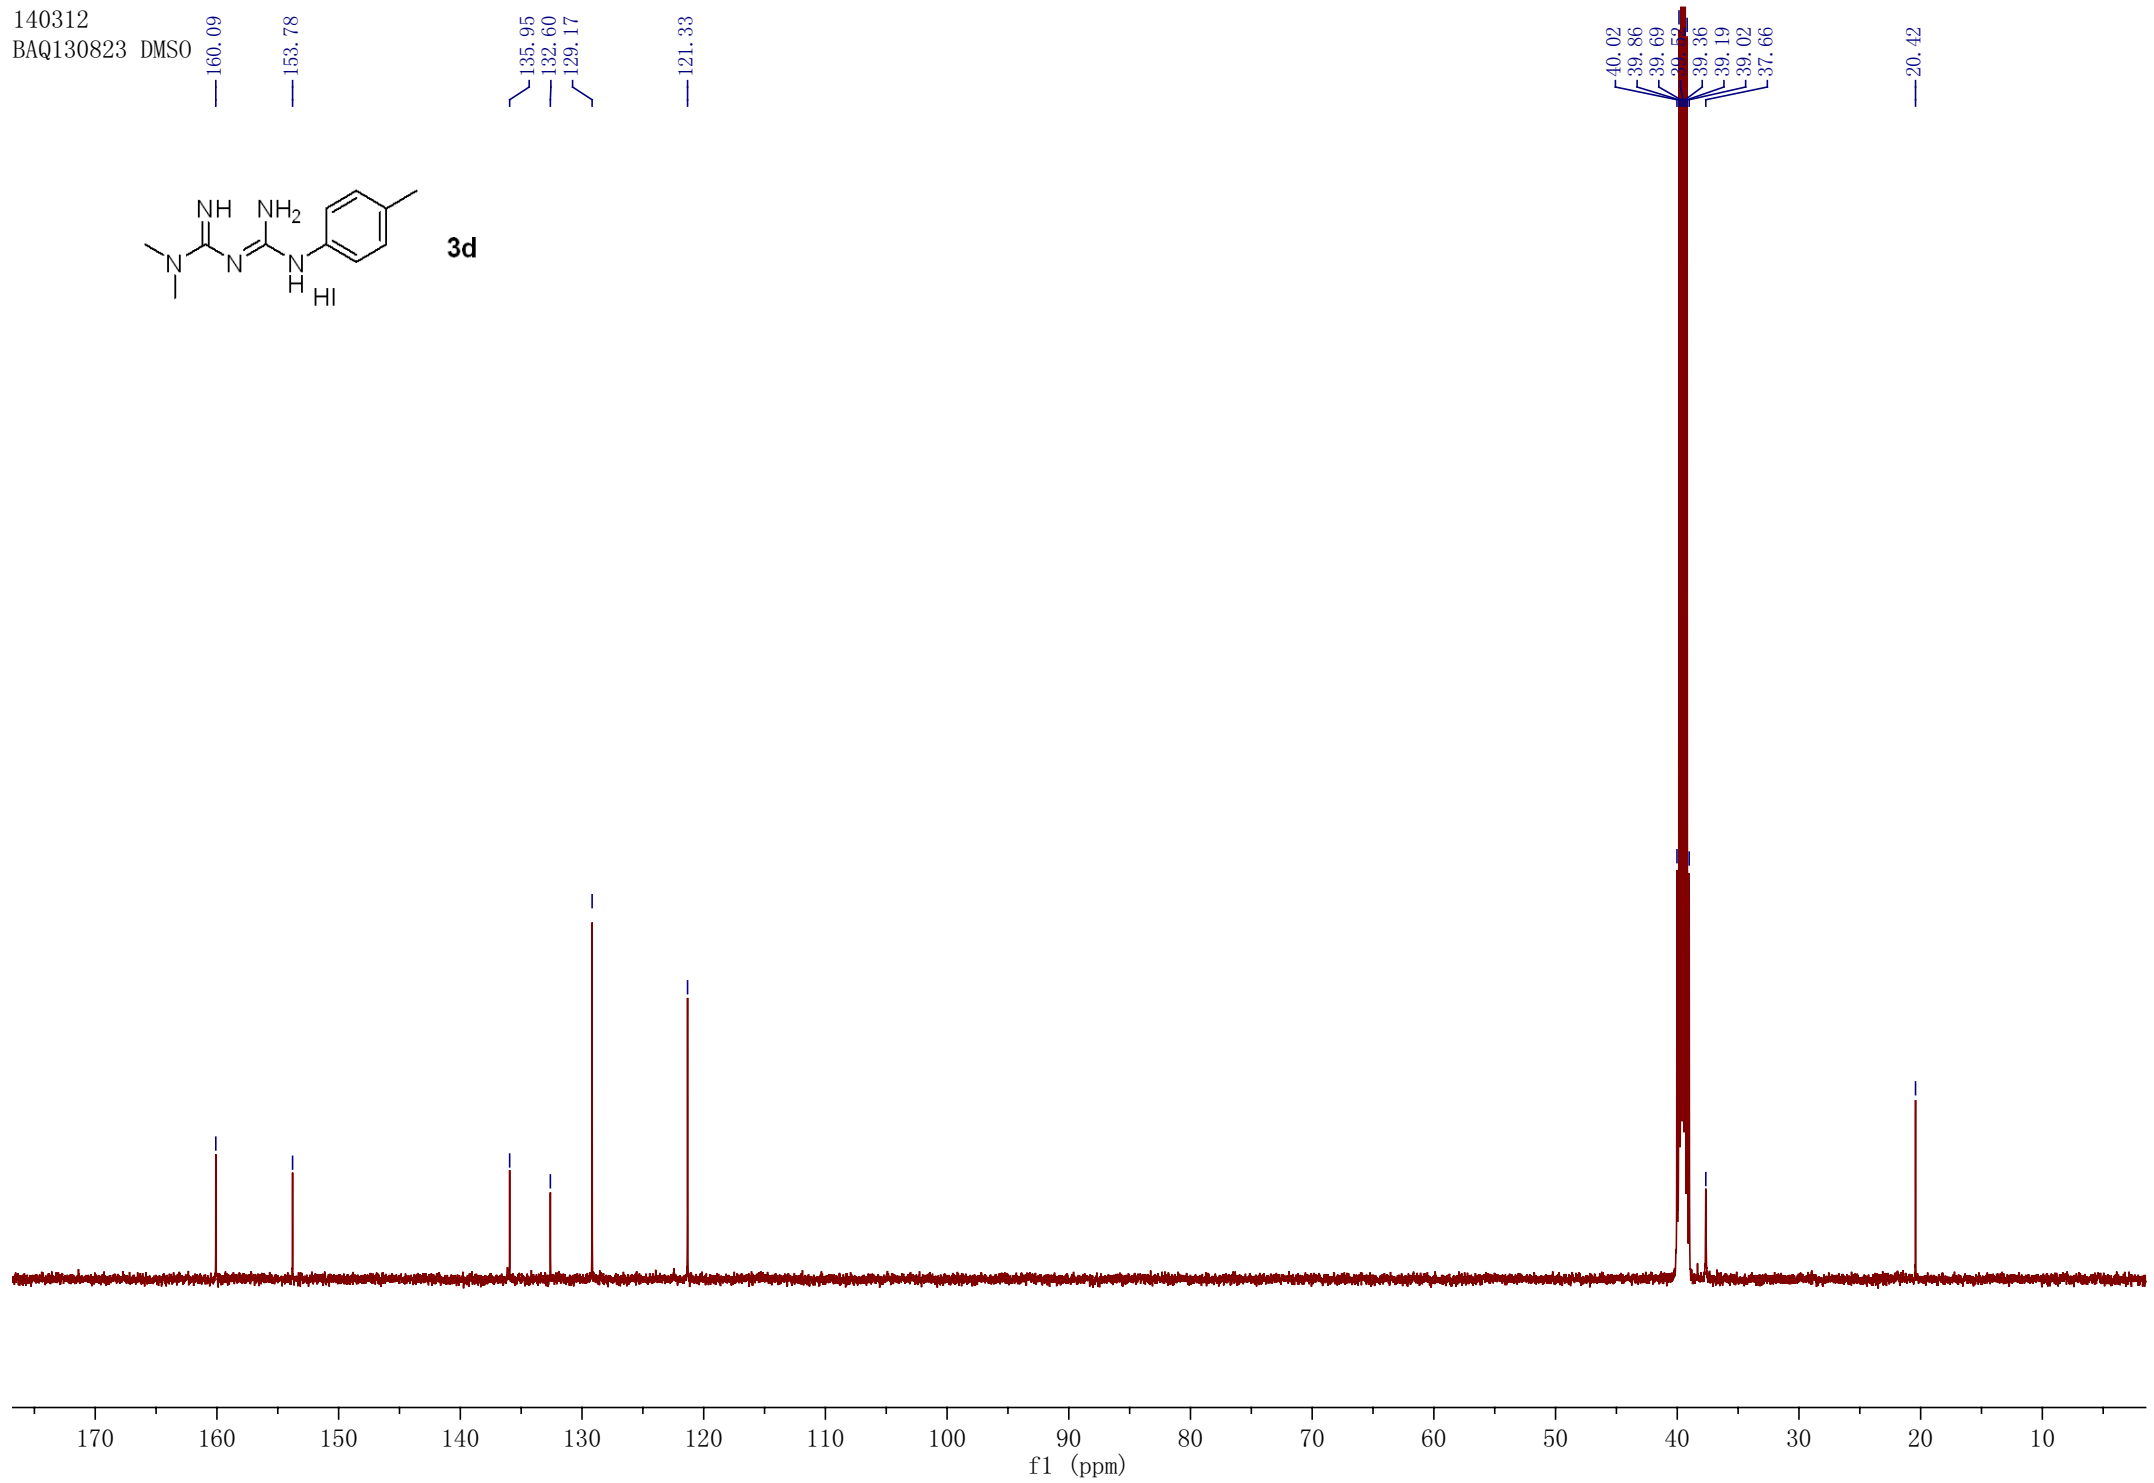

140318  
BAQ140317 DMSO

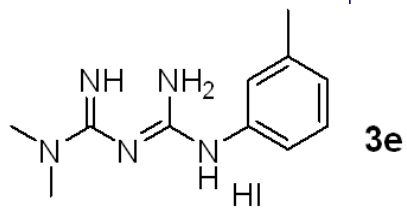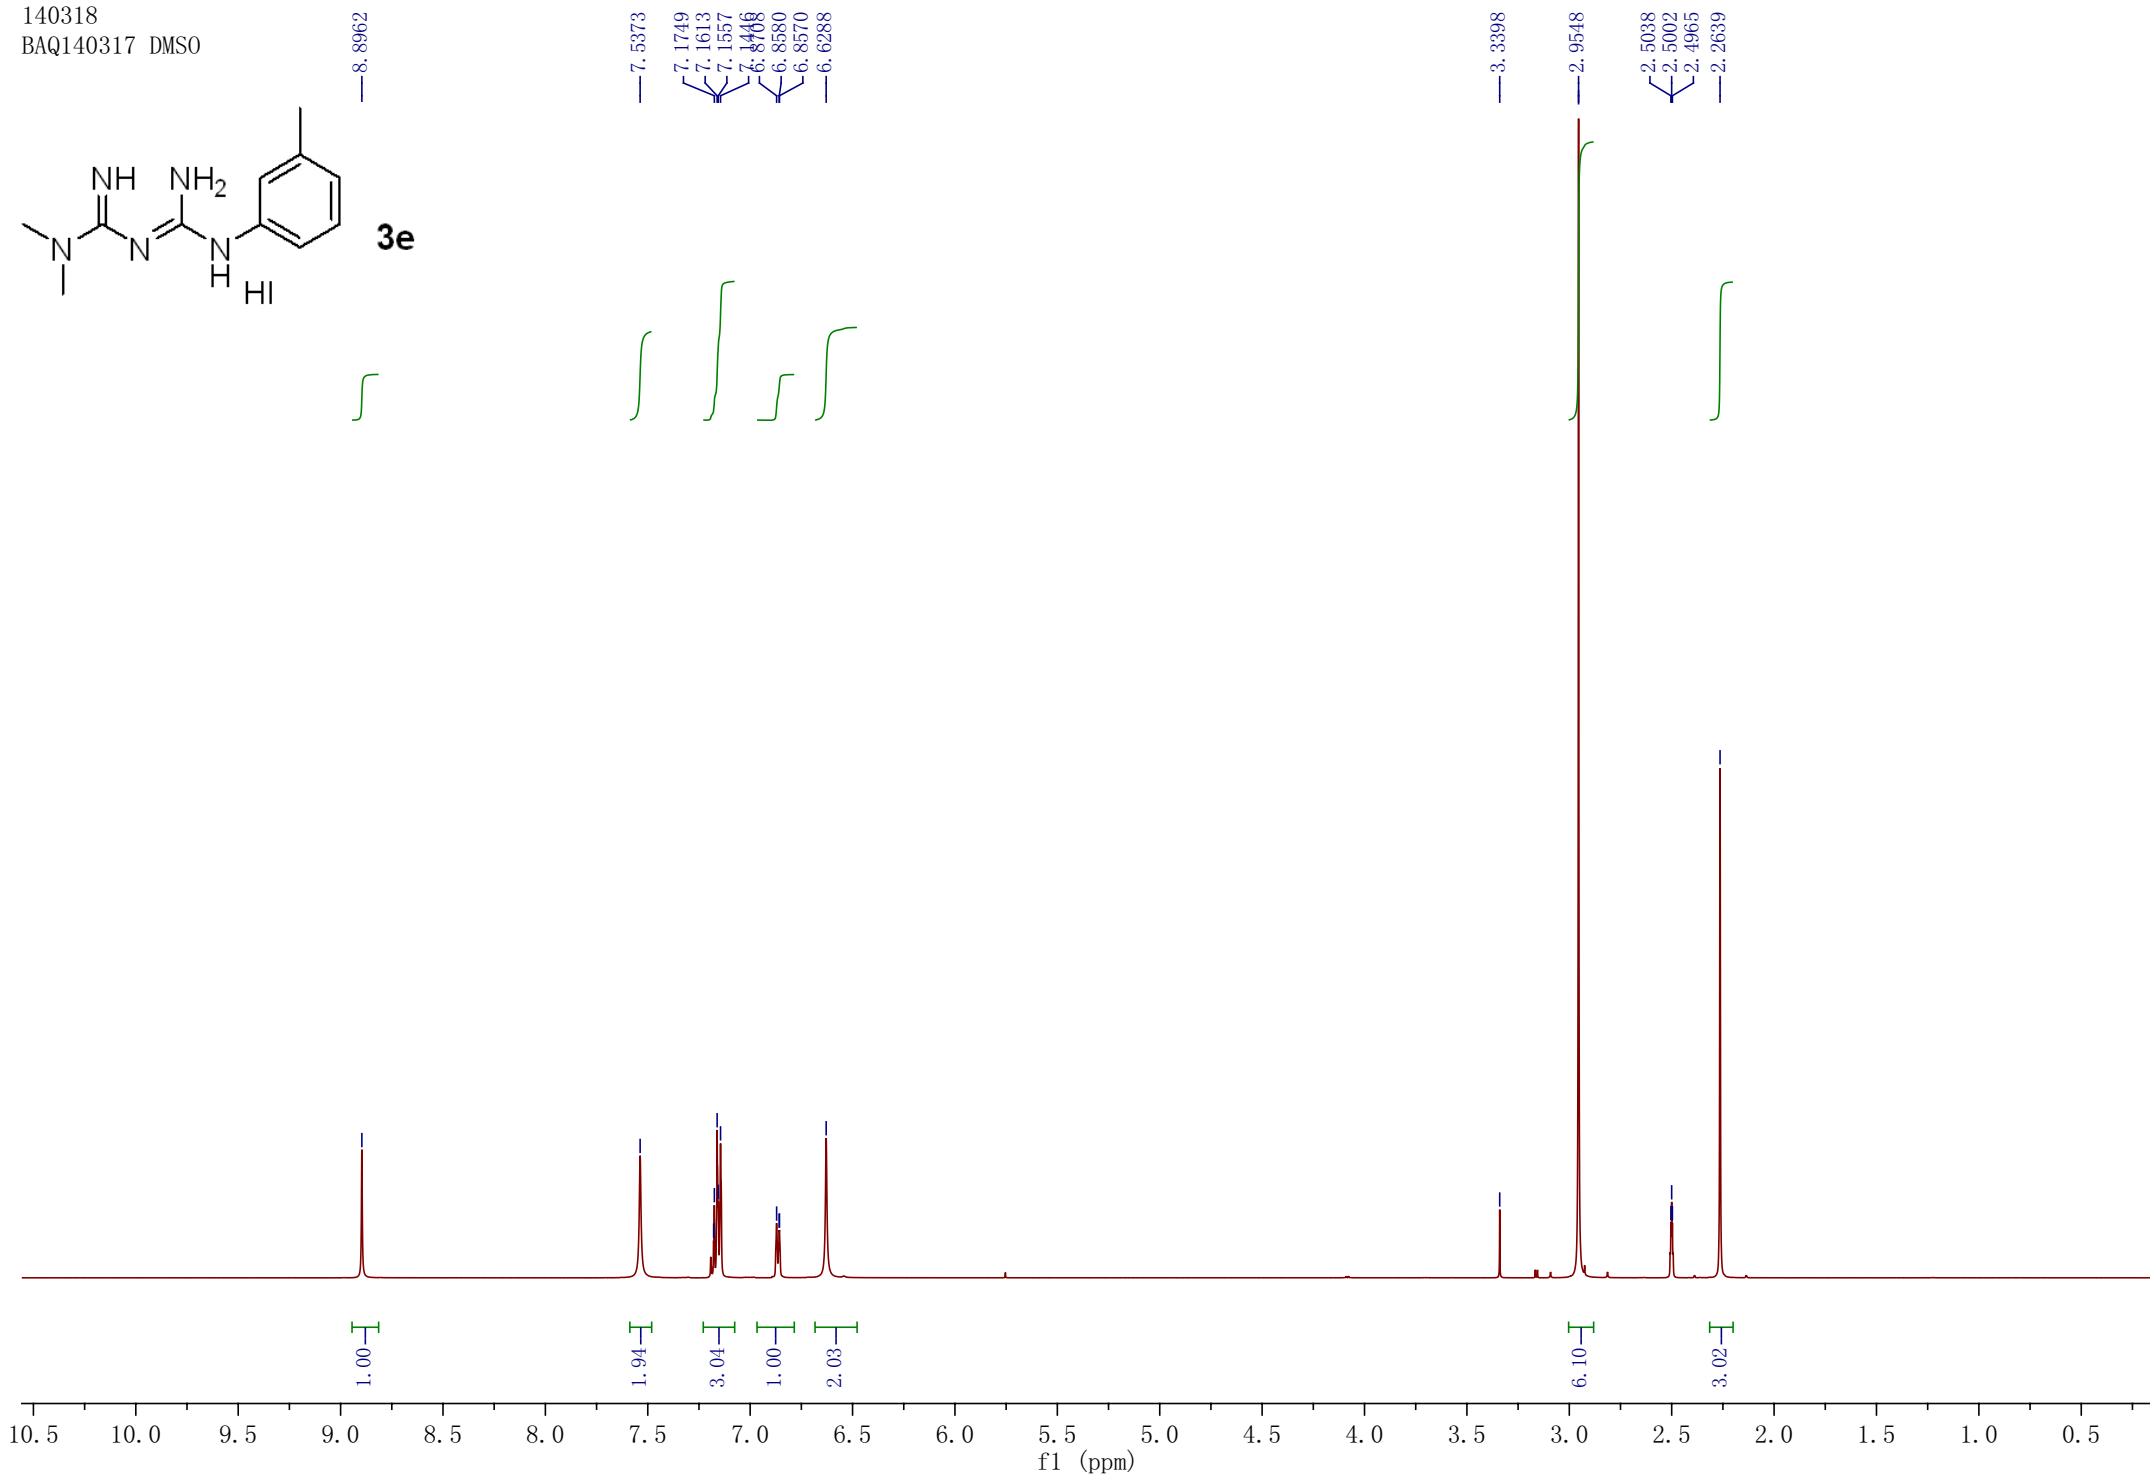

140318  
BAQ140317 DMSO

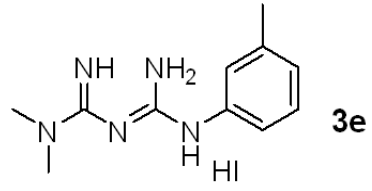

160.0383

153.4488

138.4662  
137.8835

128.4935

124.0222

121.3569

118.1124

40.0227  
39.8557  
39.6887  
39.5218  
39.3549  
39.1878  
39.0210  
37.6331

21.0830

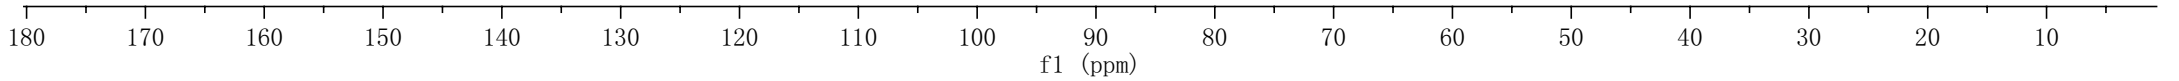

140325  
BAQ140318a DMSO

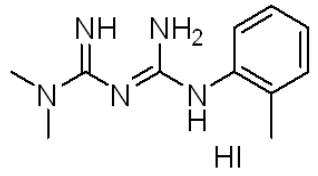

**3f**

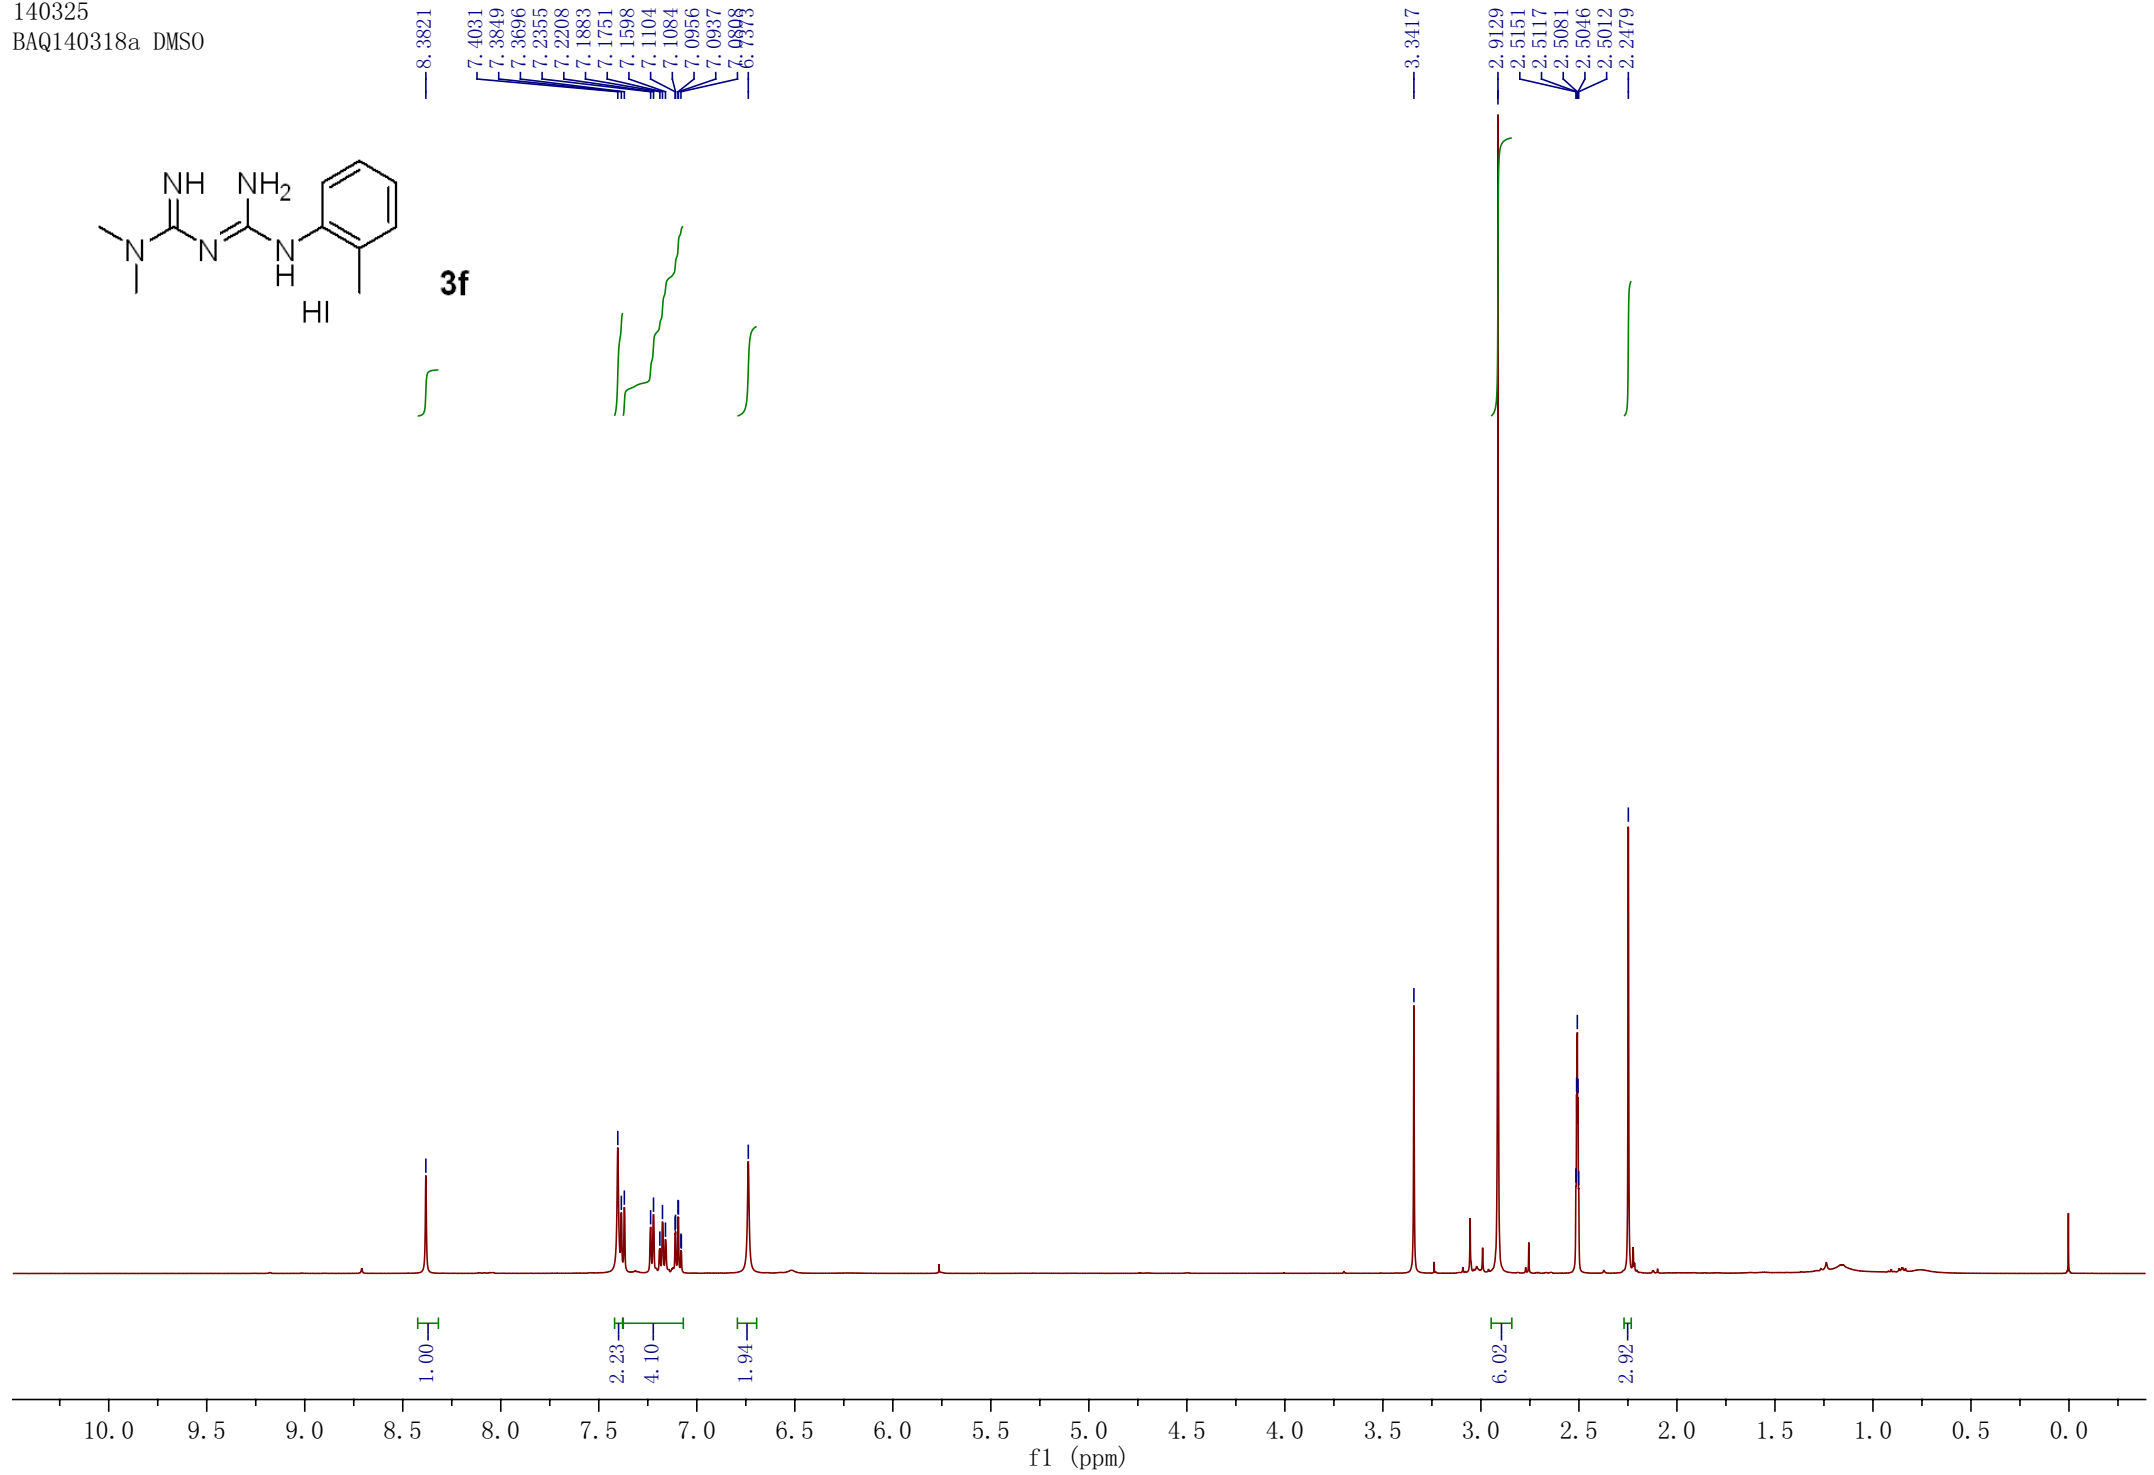



140326  
BAQ140318a DMSO

— 159.7084  
— 154.8917

— 136.1299  
— 132.1551  
— 130.3249  
— 126.0592  
— 125.6579  
— 125.3332

— 40.0217  
— 39.8550  
— 39.6879  
— 39.5210  
— 39.3541  
— 39.1870  
— 39.0202  
— 37.4799

— 17.6831

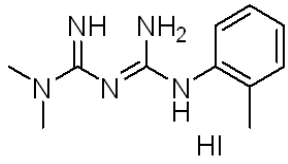

**3f**

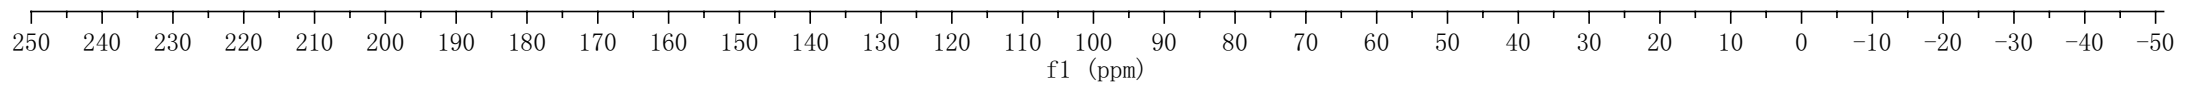

130917  
baq130913 DMSO

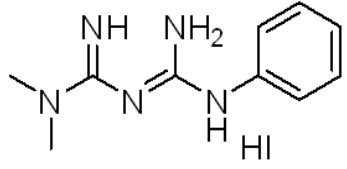

**3g**

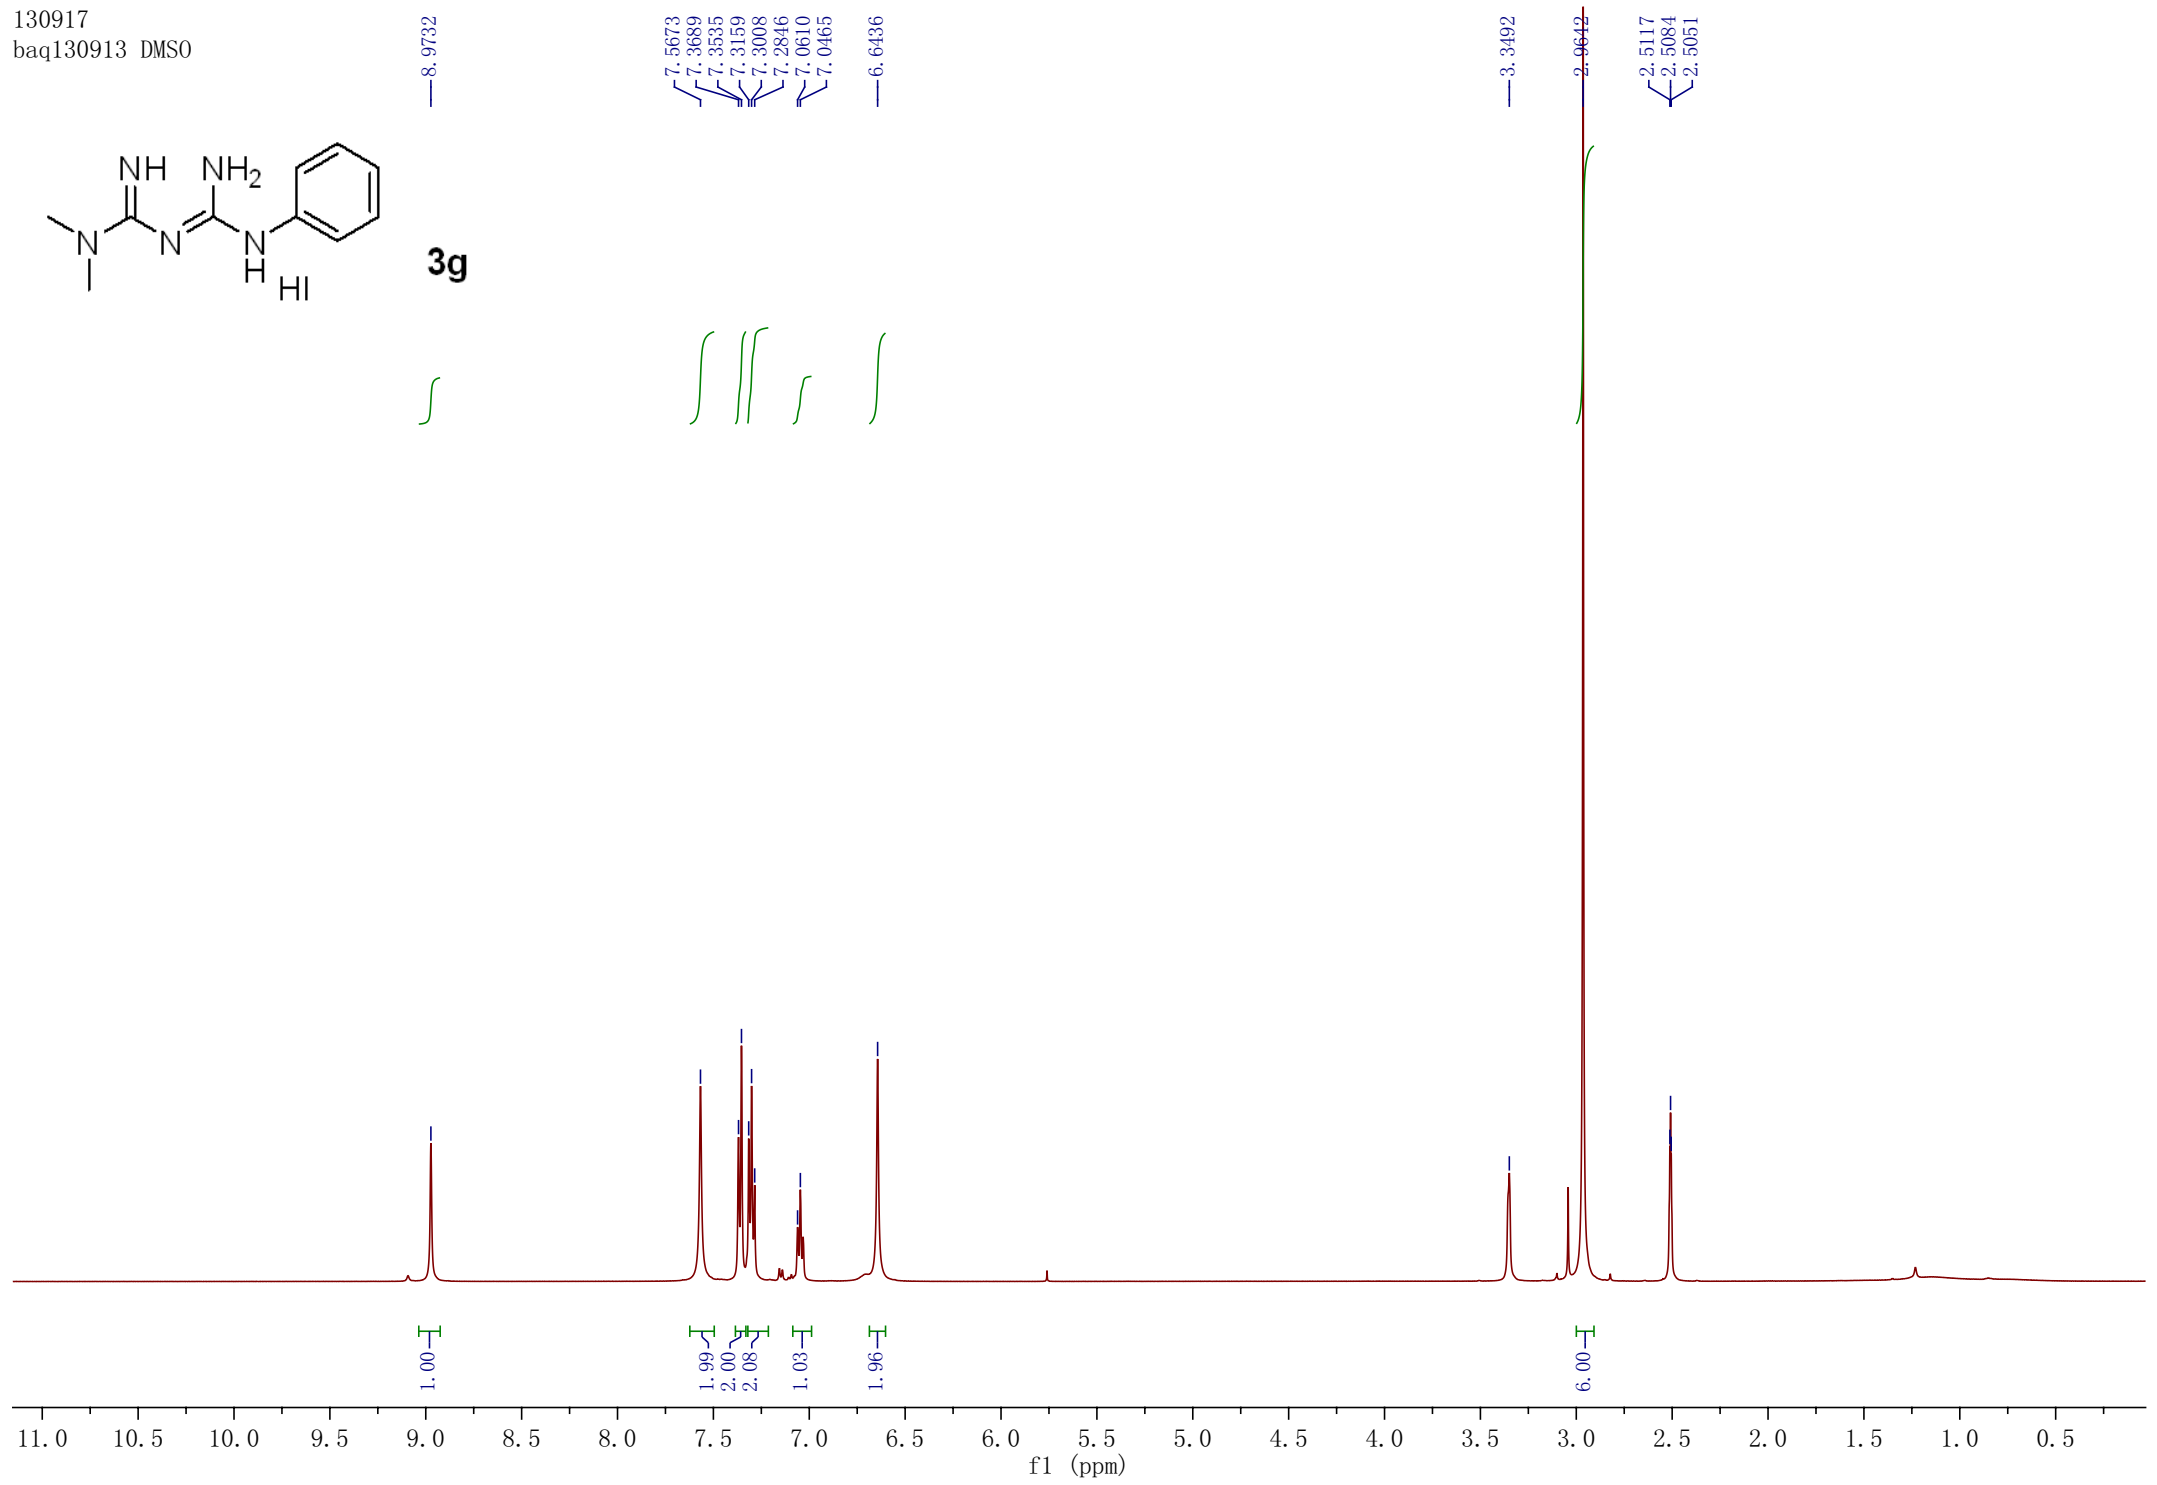

140312  
BAQ130913 DMSO

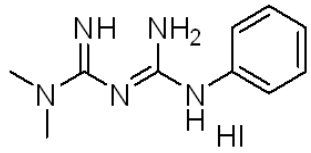

**3g**

—160.1311

—153.3805

—138.6360

—128.6577

—123.2246

—120.7942

40.0196

39.8529

39.6858

39.5189

39.3519

39.1849

39.0180

37.6576

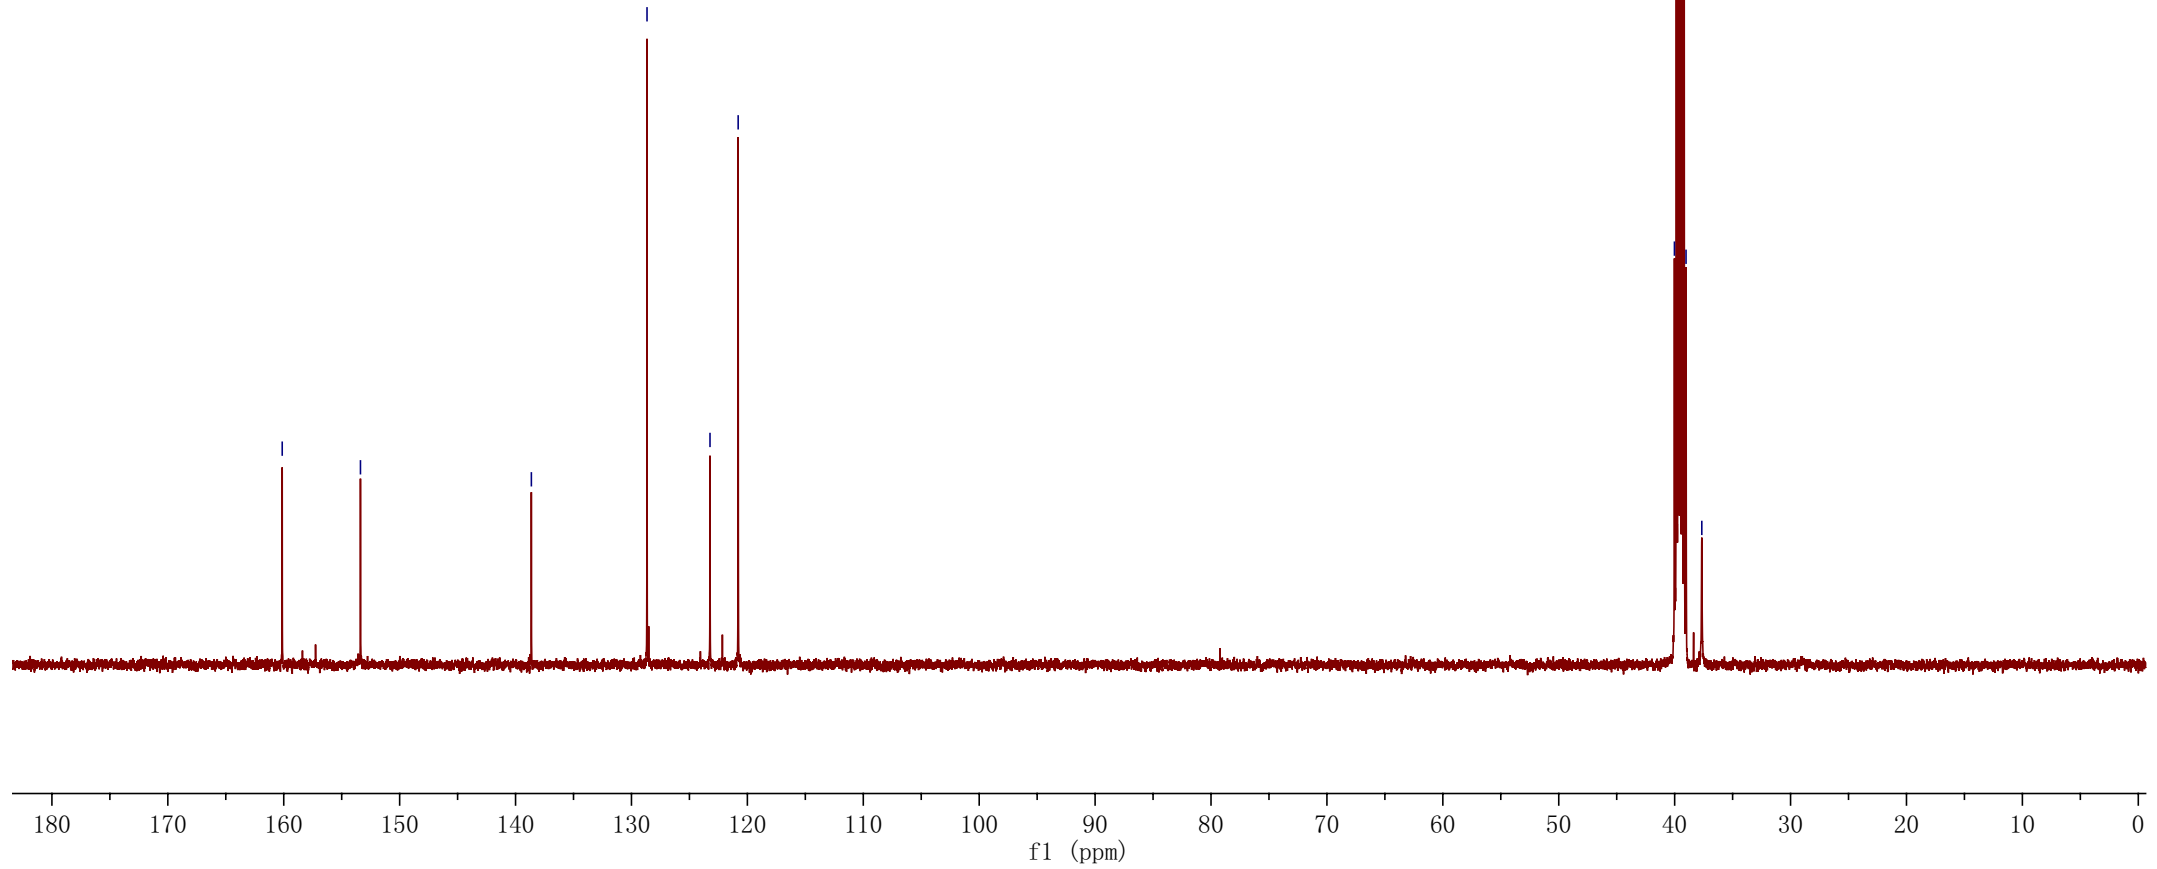

130830  
gaq130825 DMSO

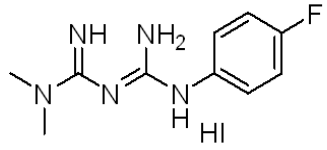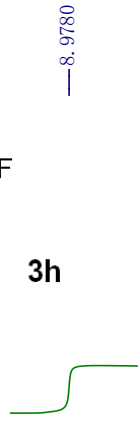

7.5428  
7.3744  
7.3646  
7.3574  
7.3477  
7.1514  
7.1341  
7.1167  
6.6410

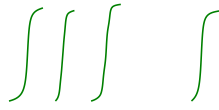

3.3594  
2.9453  
2.5006

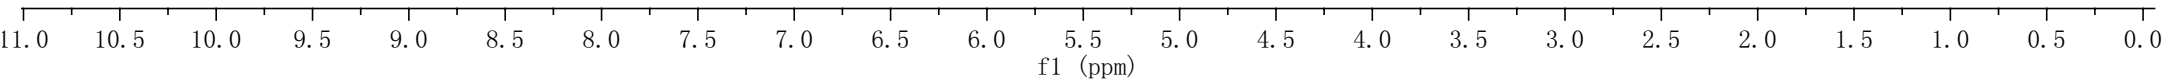

130902  
BAQ130825 DMSO

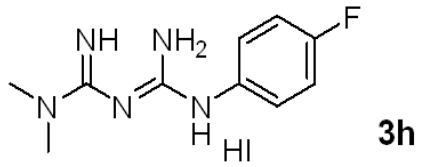

160.2090  
159.3029  
157.3929  
153.6315

134.9495

123.1593  
123.0958

115.3765  
115.1987

40.0695  
39.9022  
39.7353  
39.5682  
39.4013  
39.2344  
39.0673  
37.7166

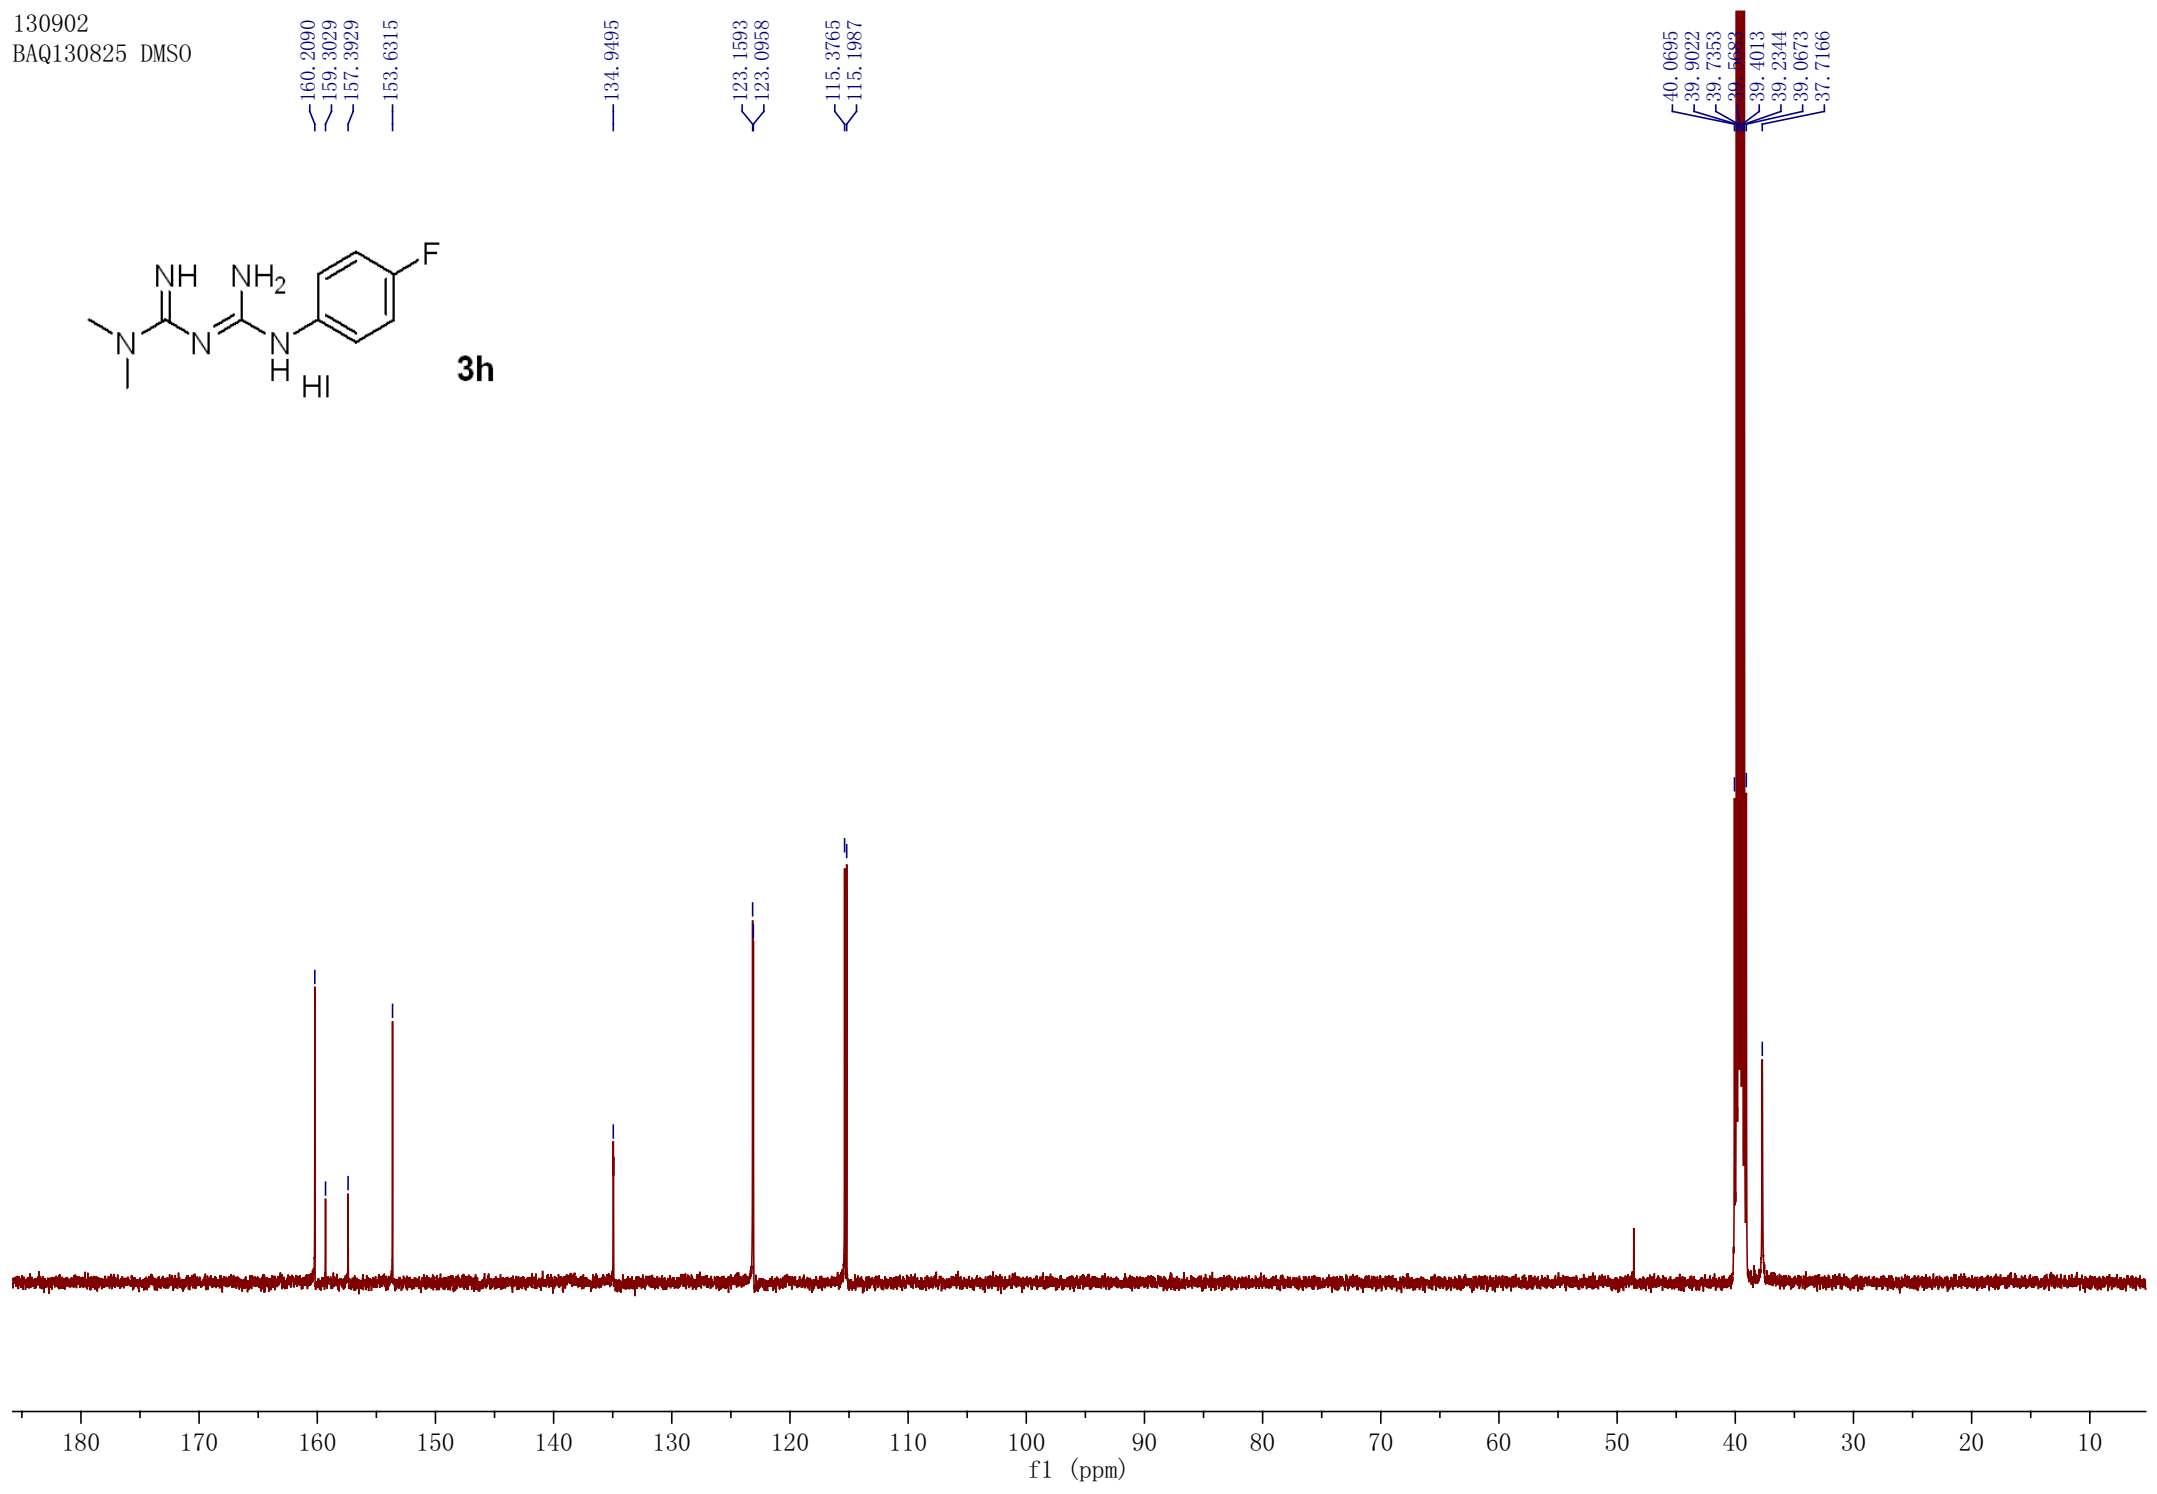

130827  
BAQ130824 DMSO

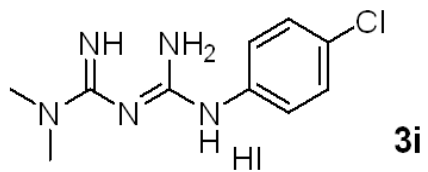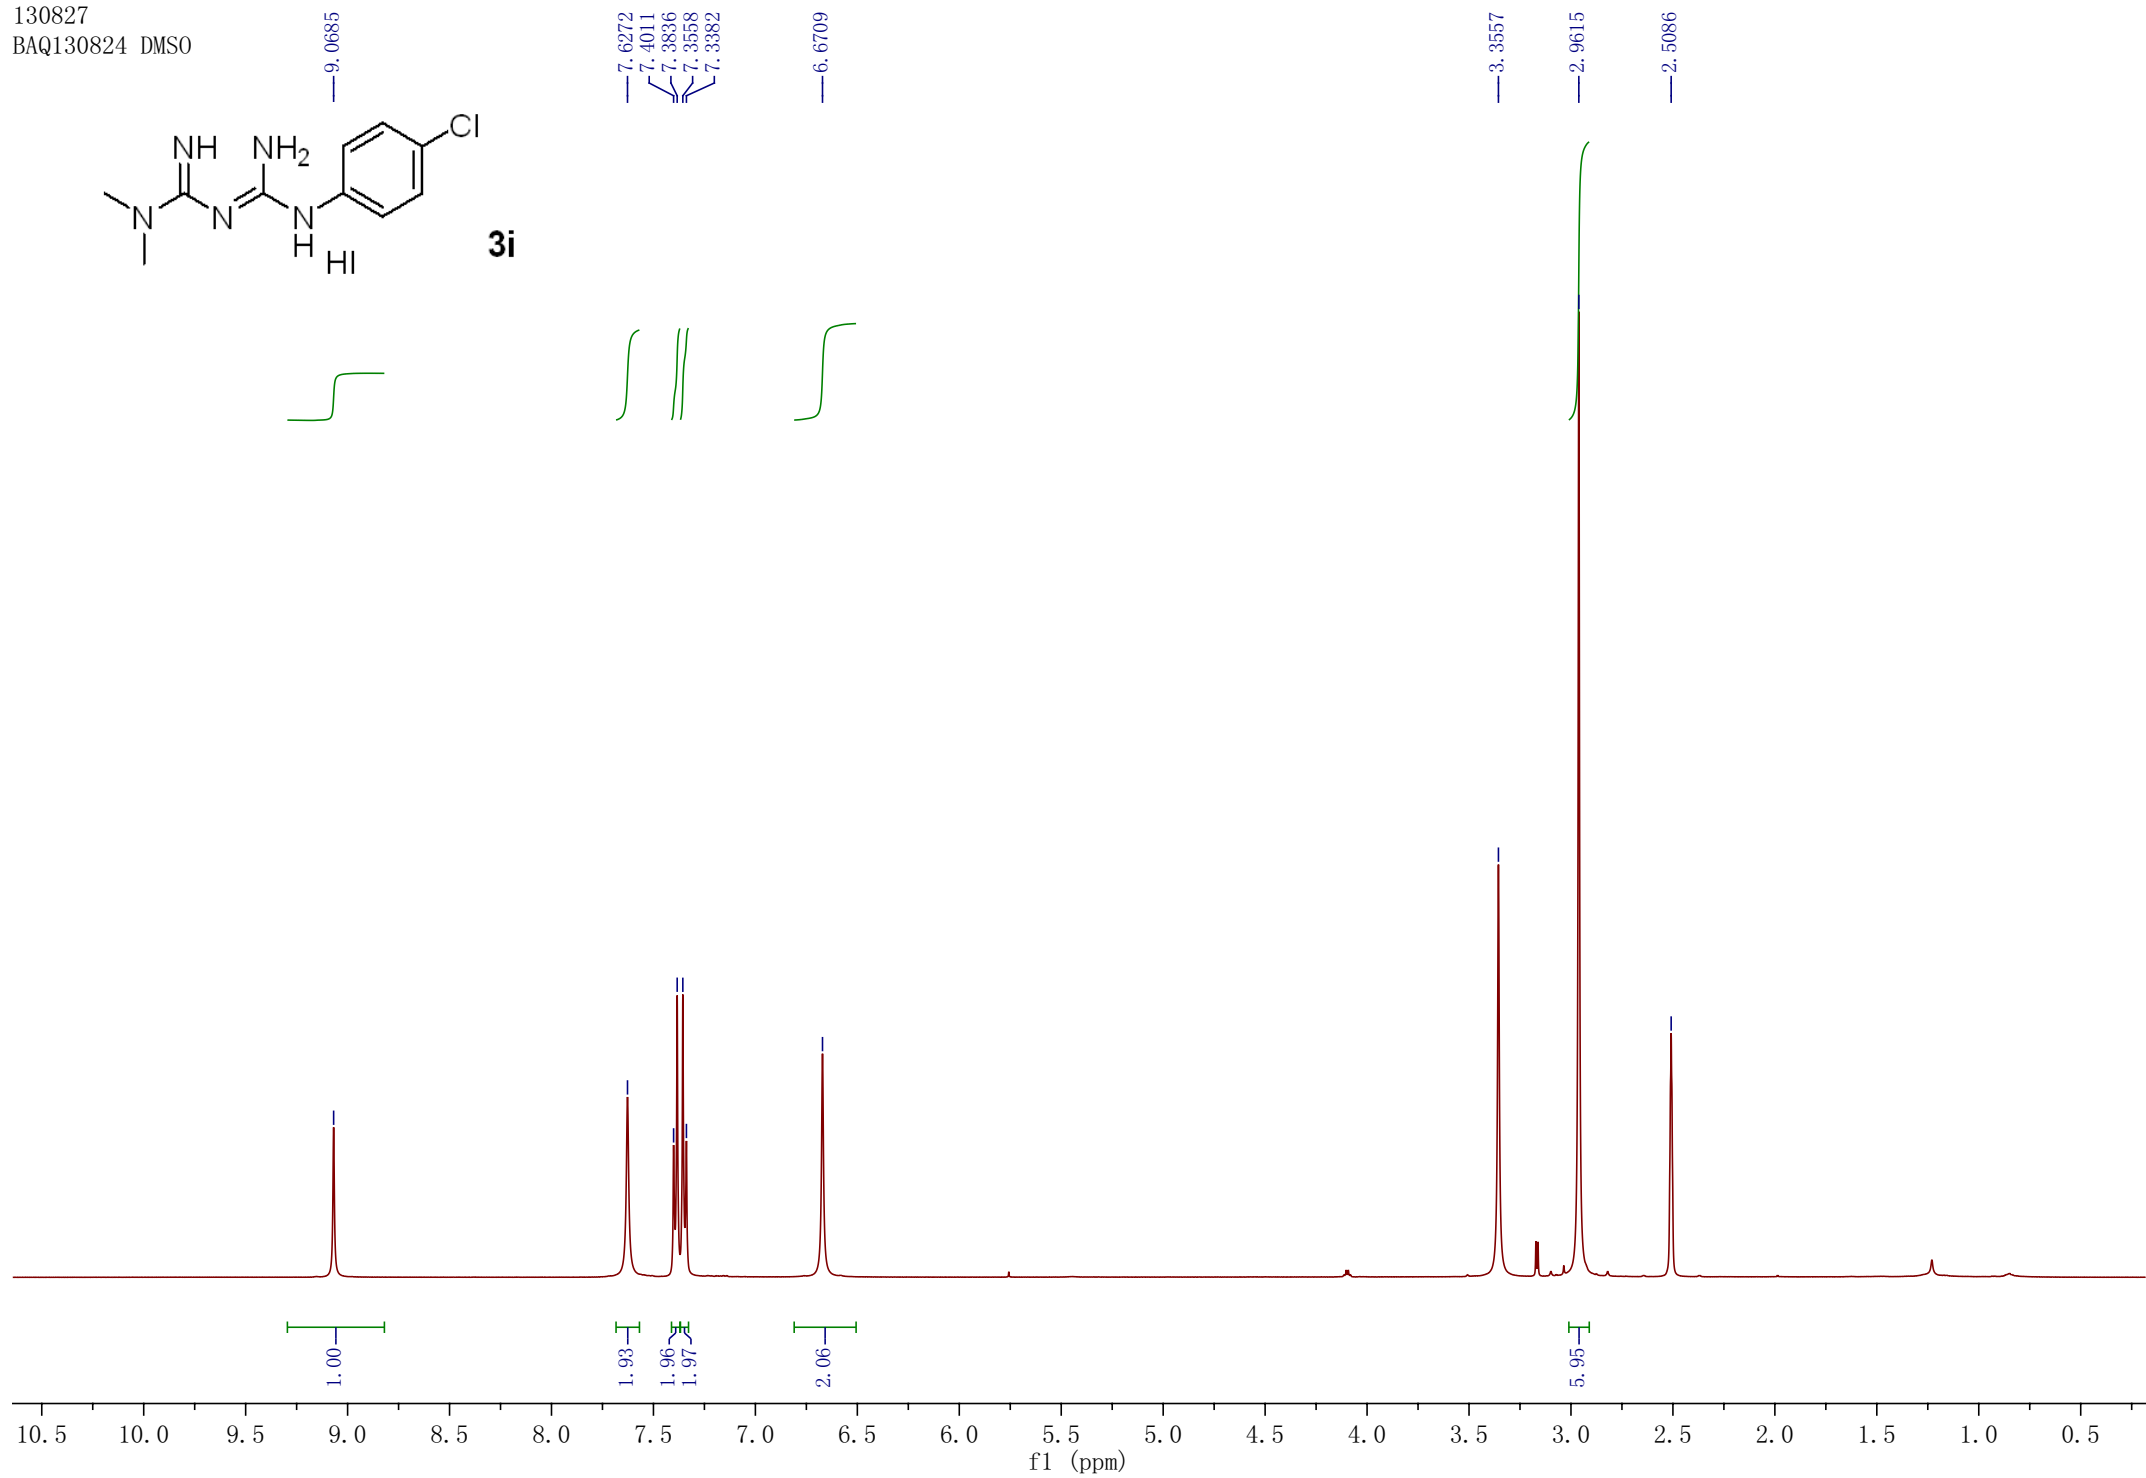

130828  
BAQ130824 DMSO

160.2164

153.0061

137.7126

128.4516

126.8196

122.2126

40.0218

39.8550

39.6882

39.5214

39.3542

39.1873

39.0204

37.6344

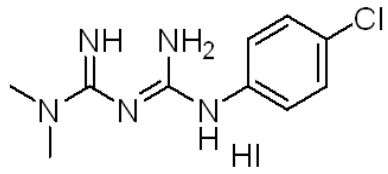

**3i**

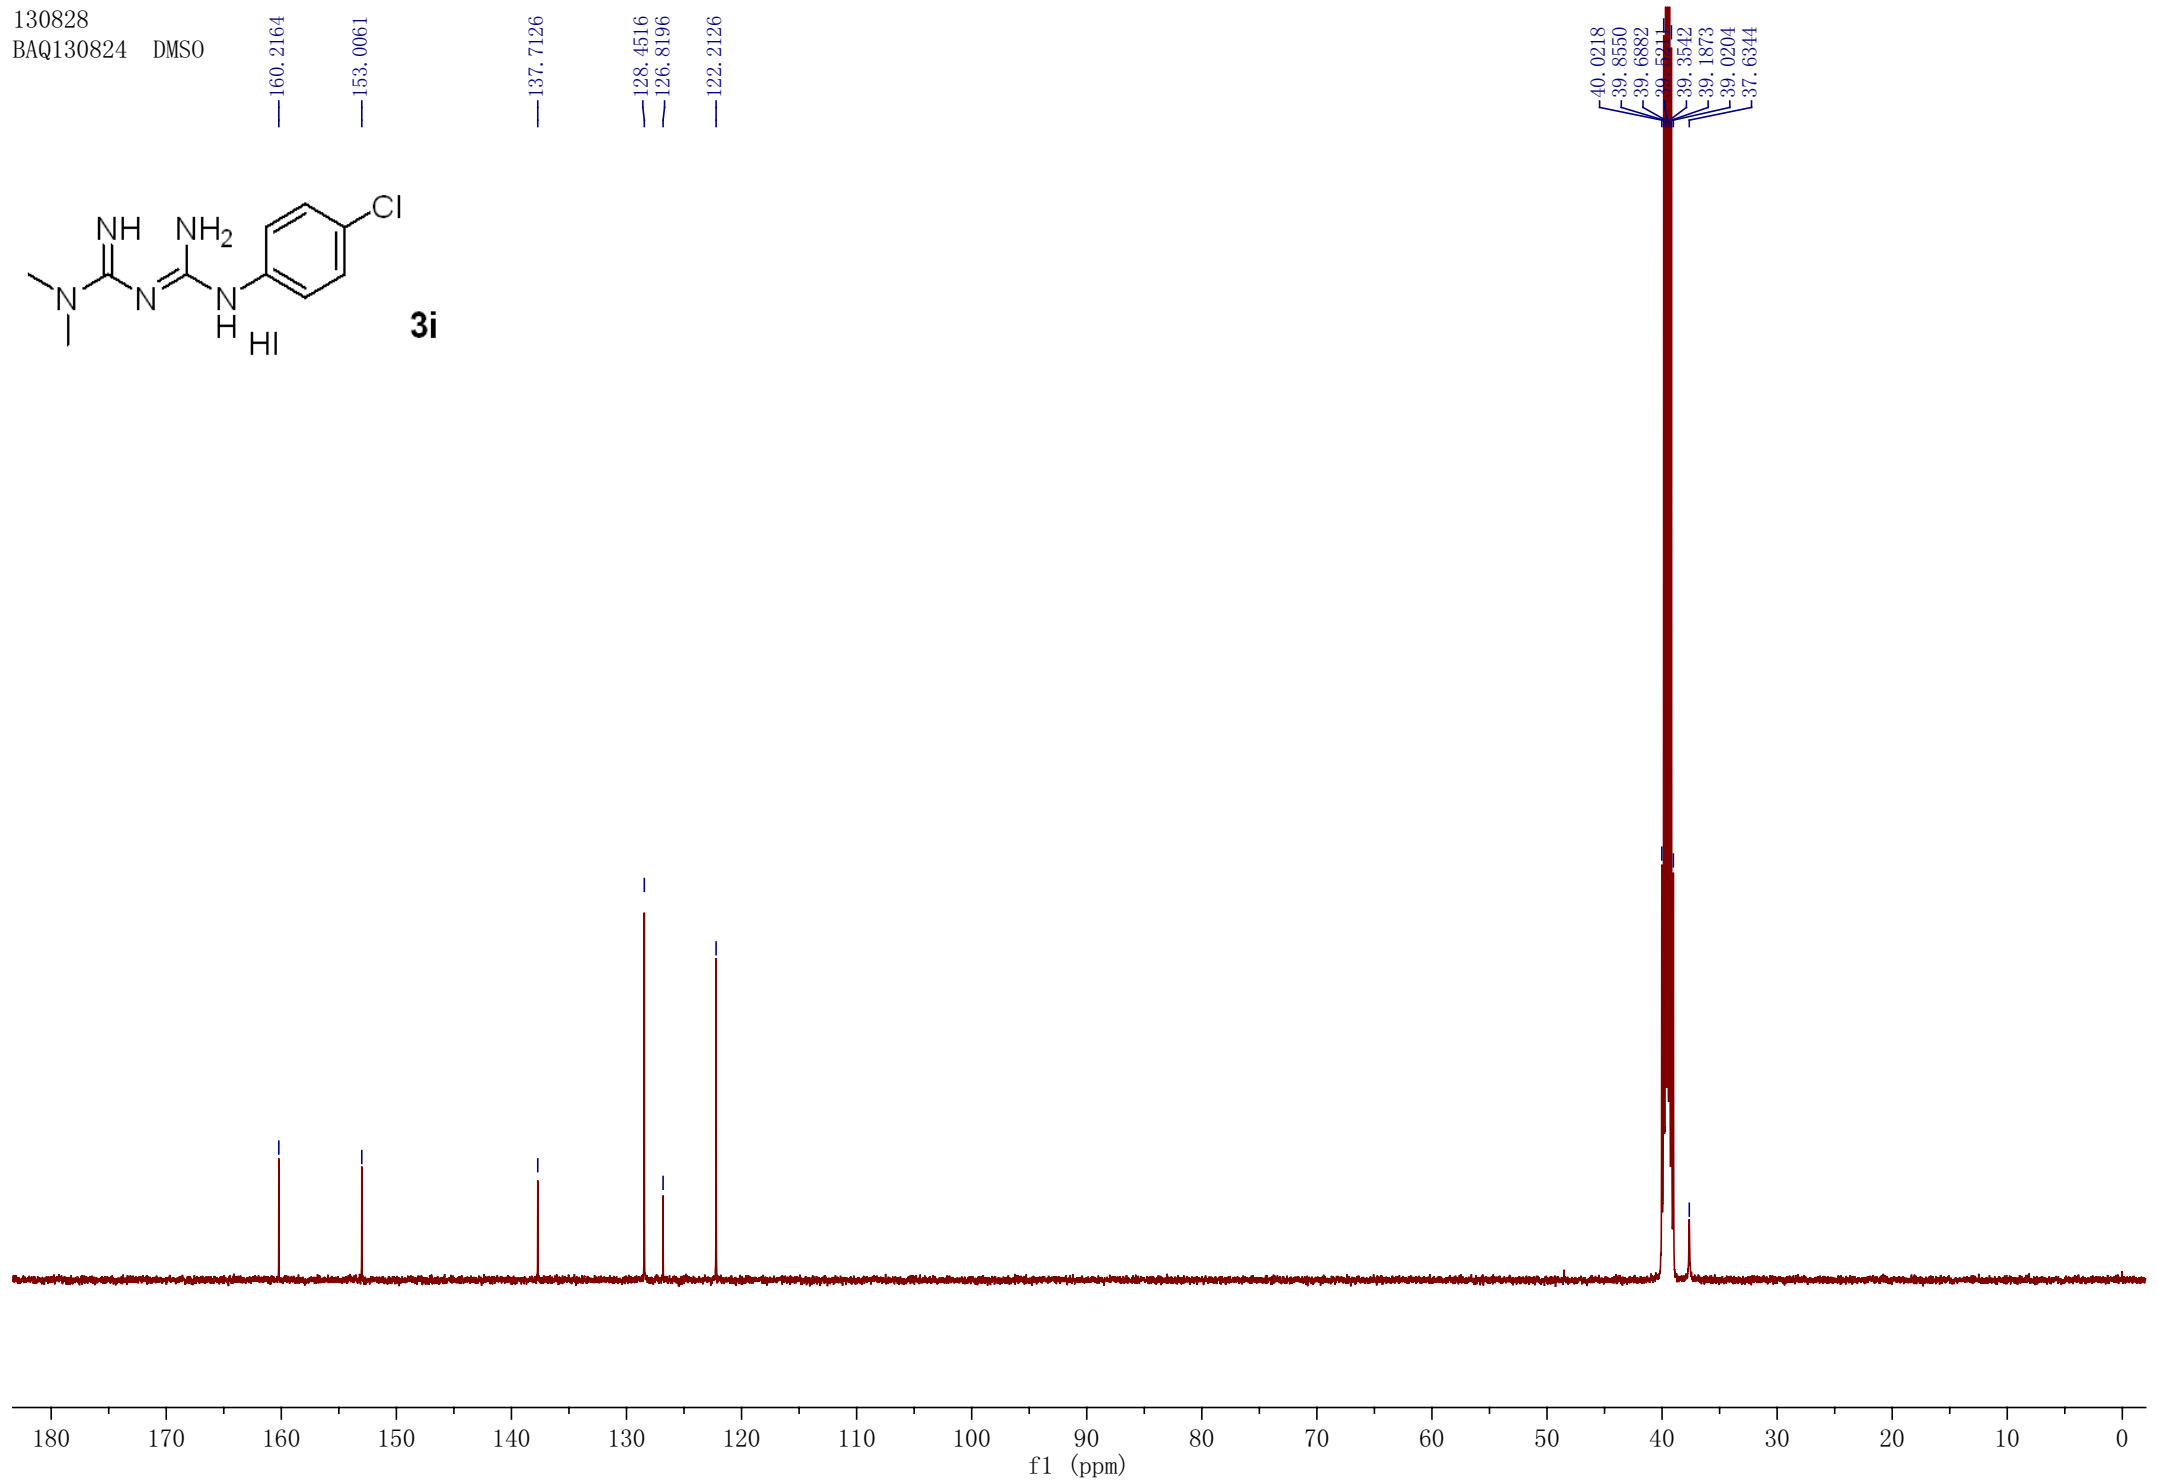

BAQ131221a DMSO 13A11490

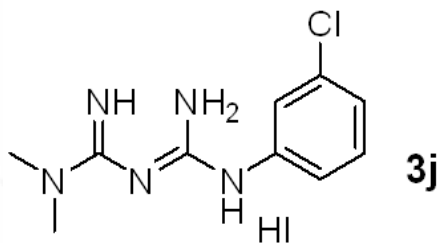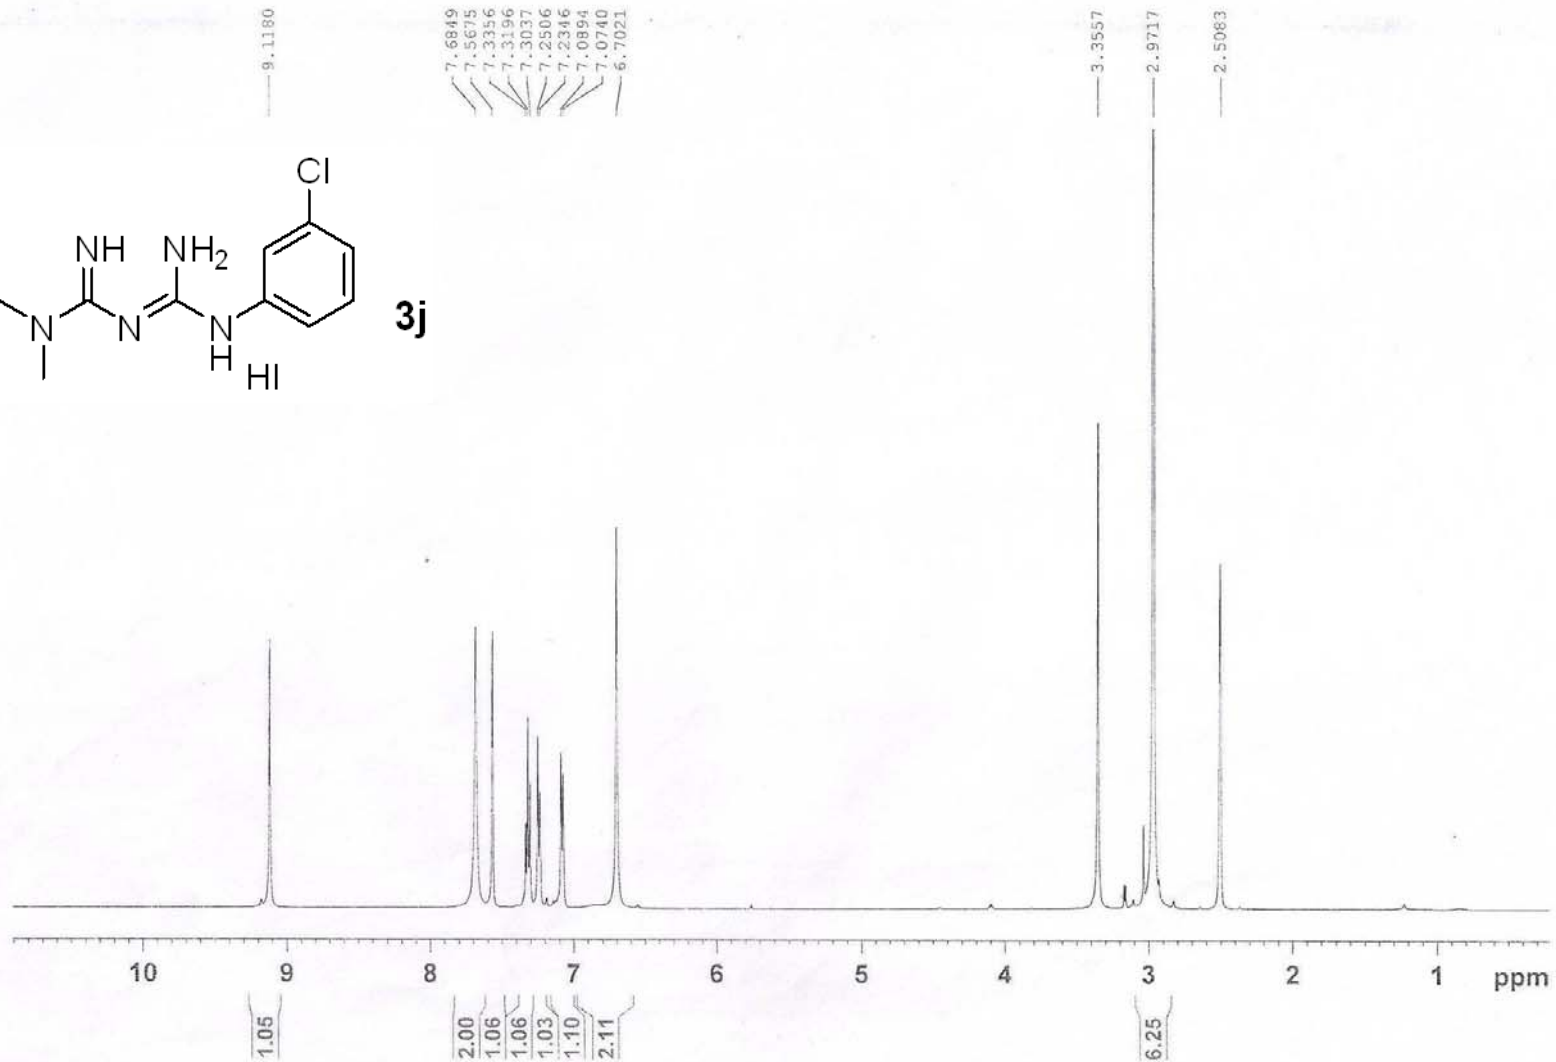



131230  
BAQ131221a DMSO

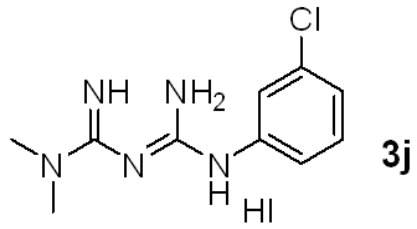

160.3087

152.7169

140.3999

132.8528

130.2513

122.5980

119.8694

118.8368

40.0114

39.8447

39.6776

39.5105

39.3438

39.1770

39.0104

37.6753

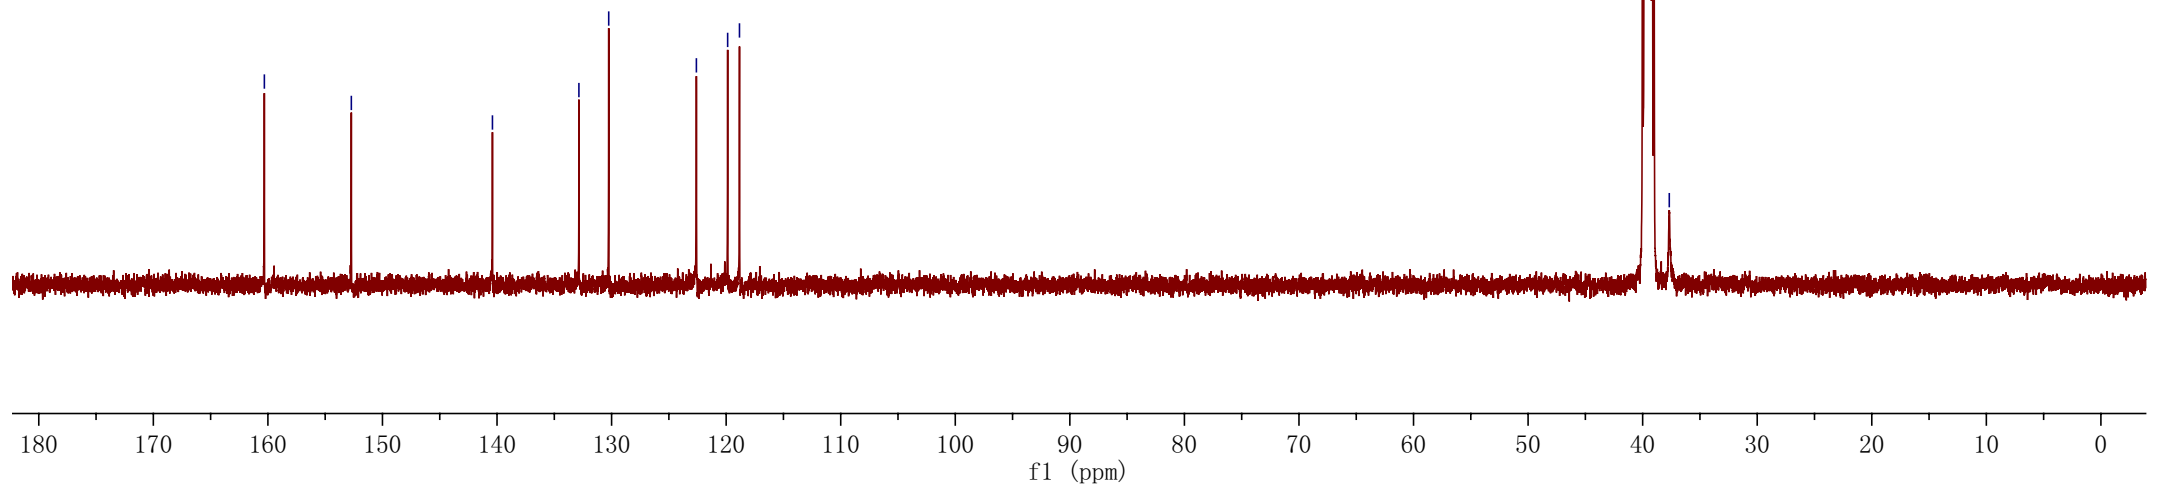

140505  
BAQ140409b DMSO

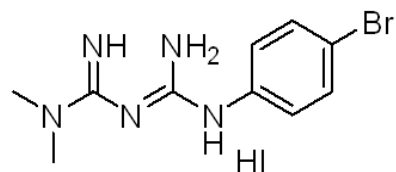

**3k**

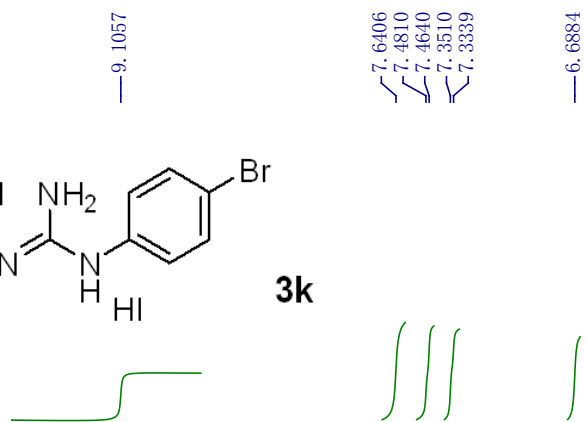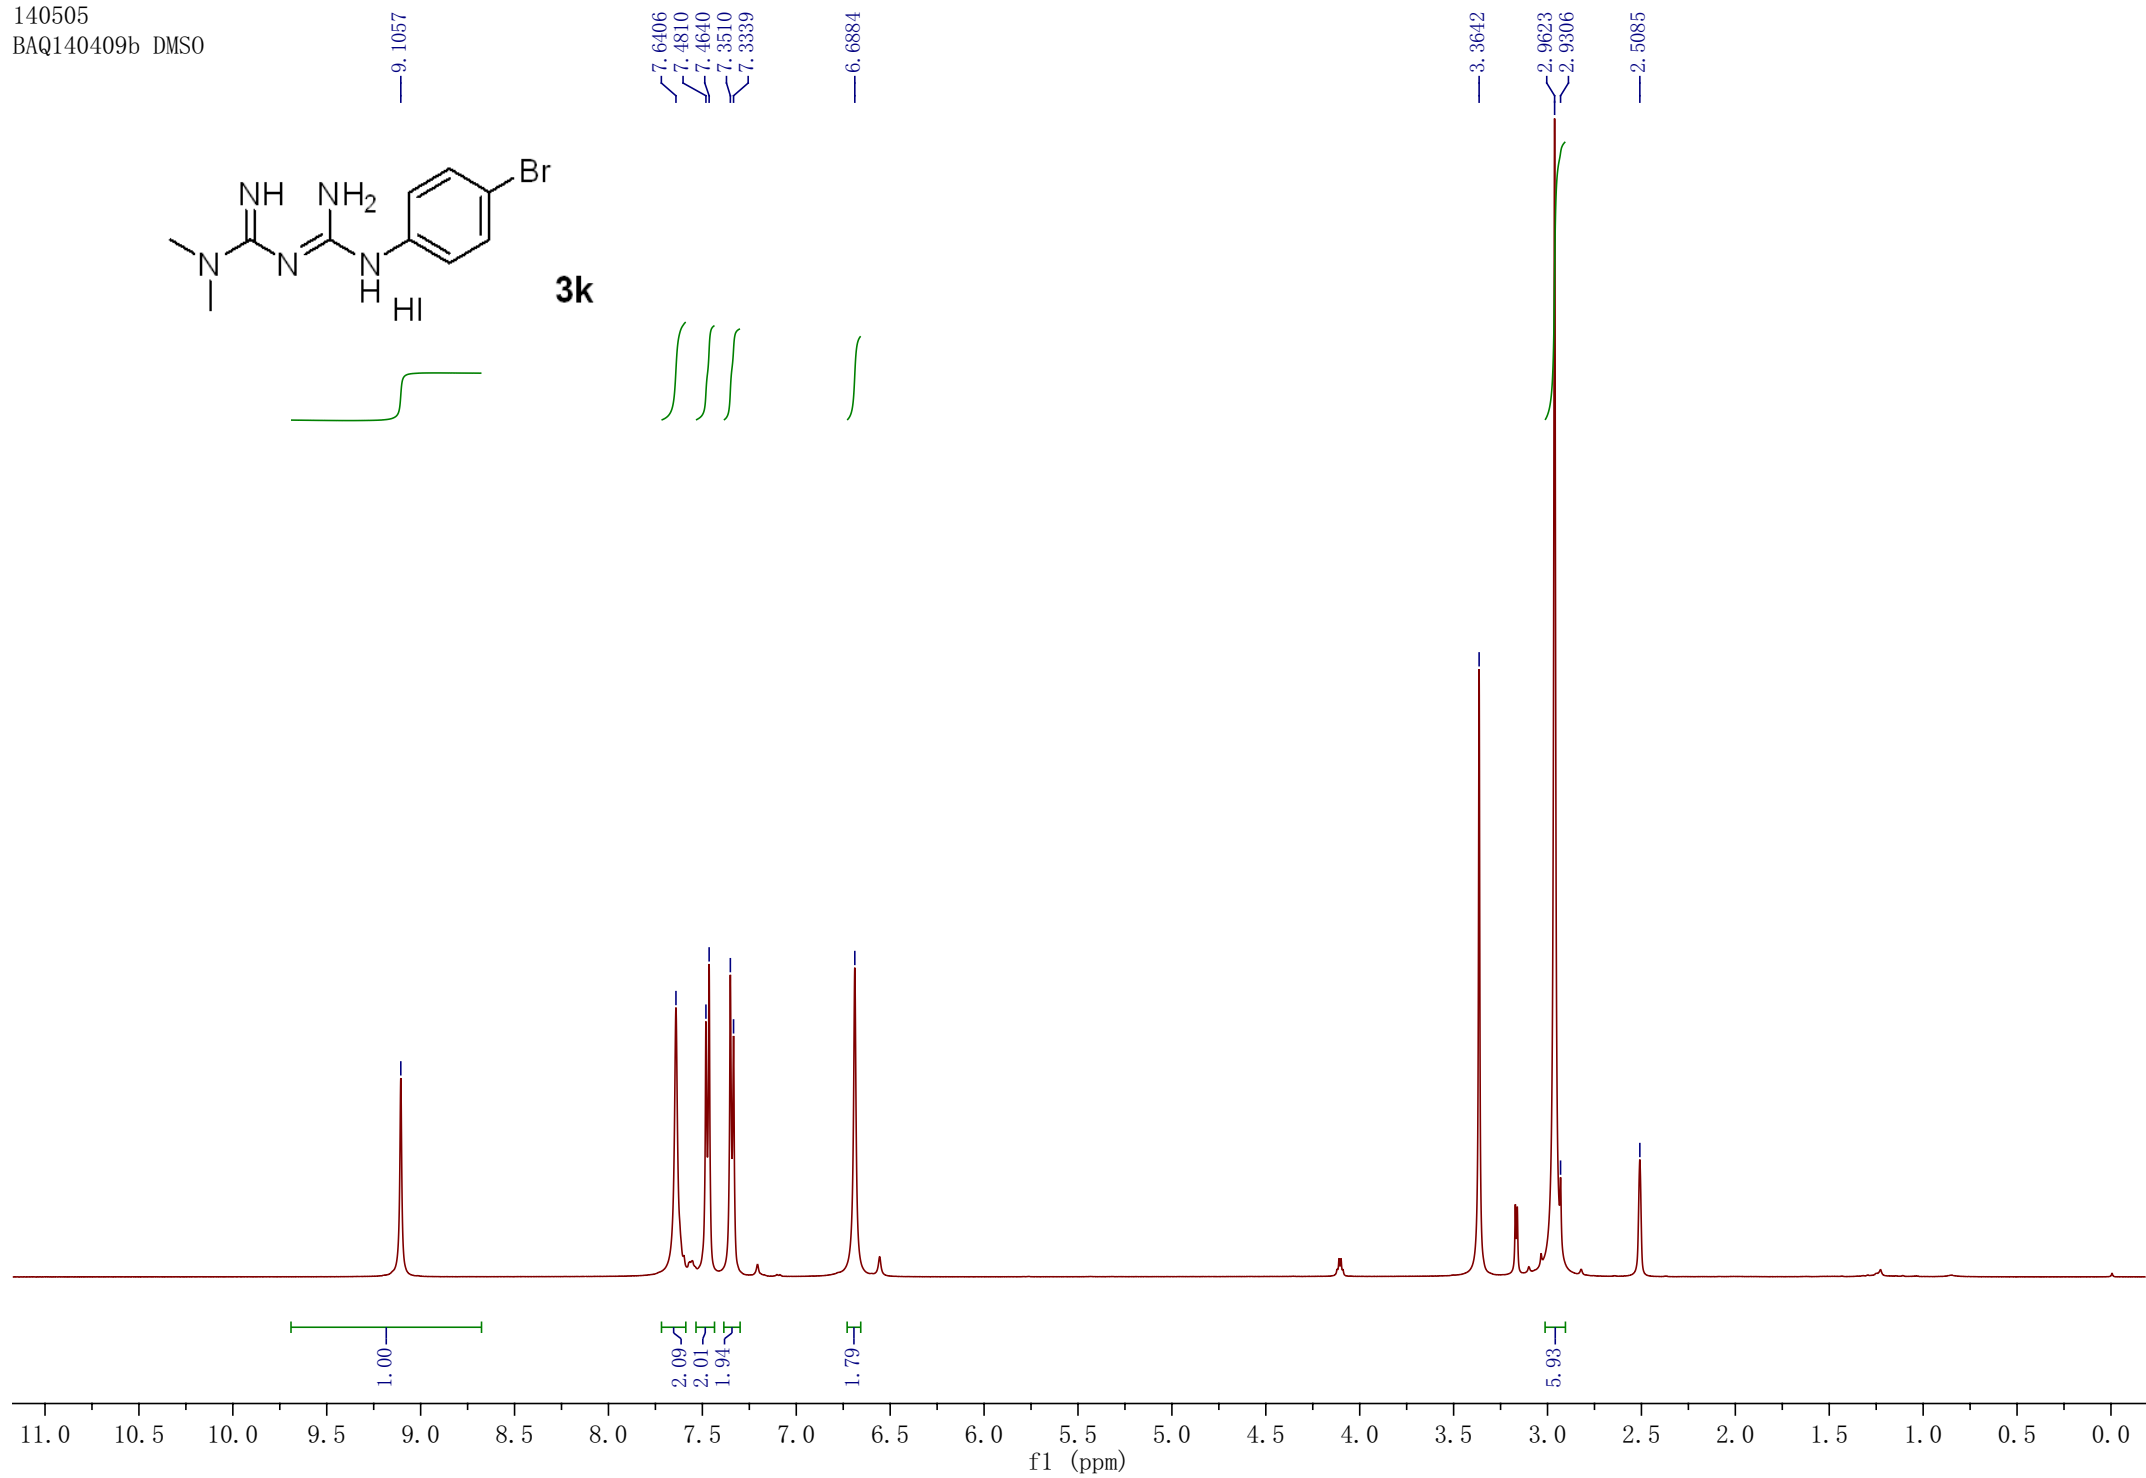

14140506  
BAQ140409b DMSO

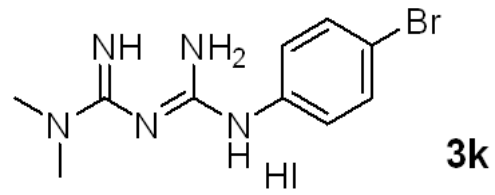

160.24  
152.94  
138.21  
131.38  
122.53  
114.78

40.01  
39.84  
39.68  
39.51  
39.34  
39.18  
39.01  
37.68

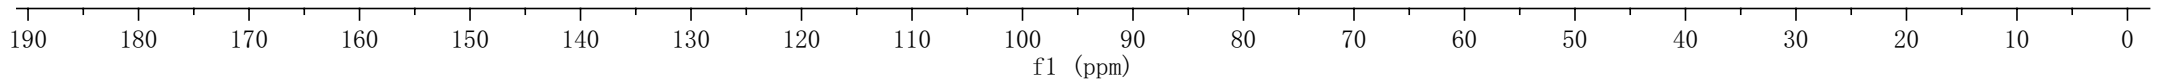

131218  
BAQ131215 DMSO

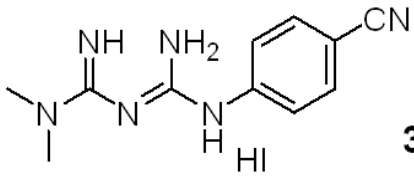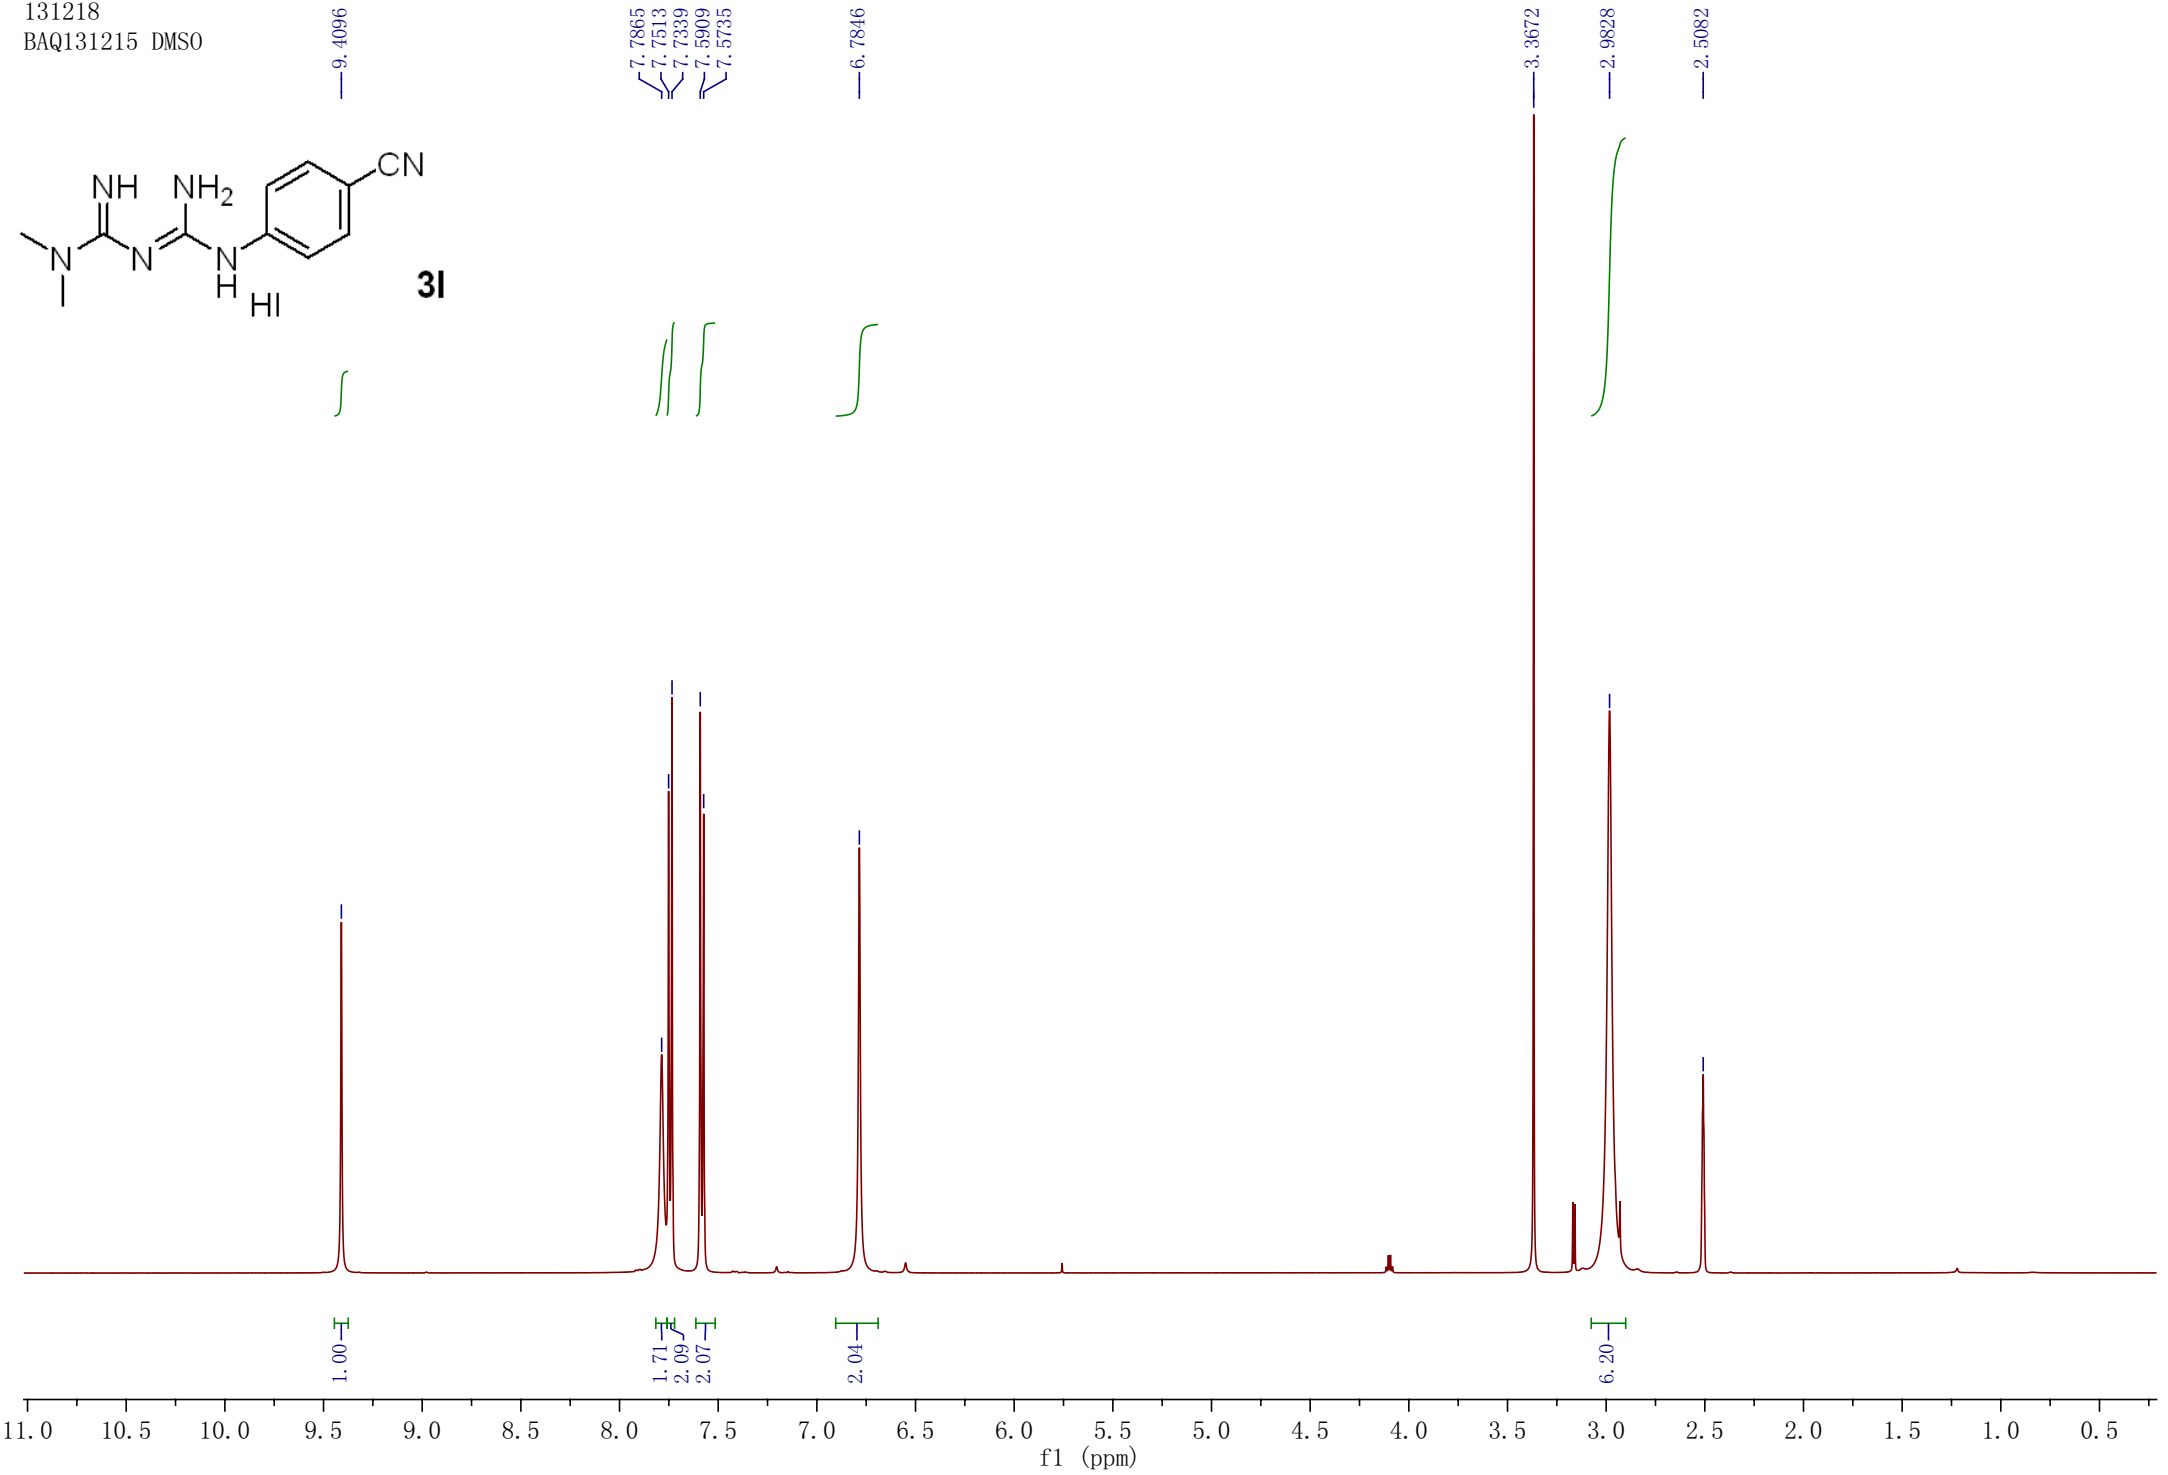

131220  
BAQ131215 DMSO

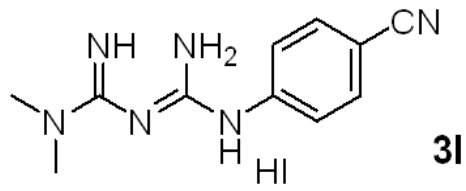

160.4135

152.0530

143.5304

133.0203

119.6936

119.0848

104.0728

40.0096

39.8431

39.6761

39.5090

39.3421

39.1751

39.0078

37.8084

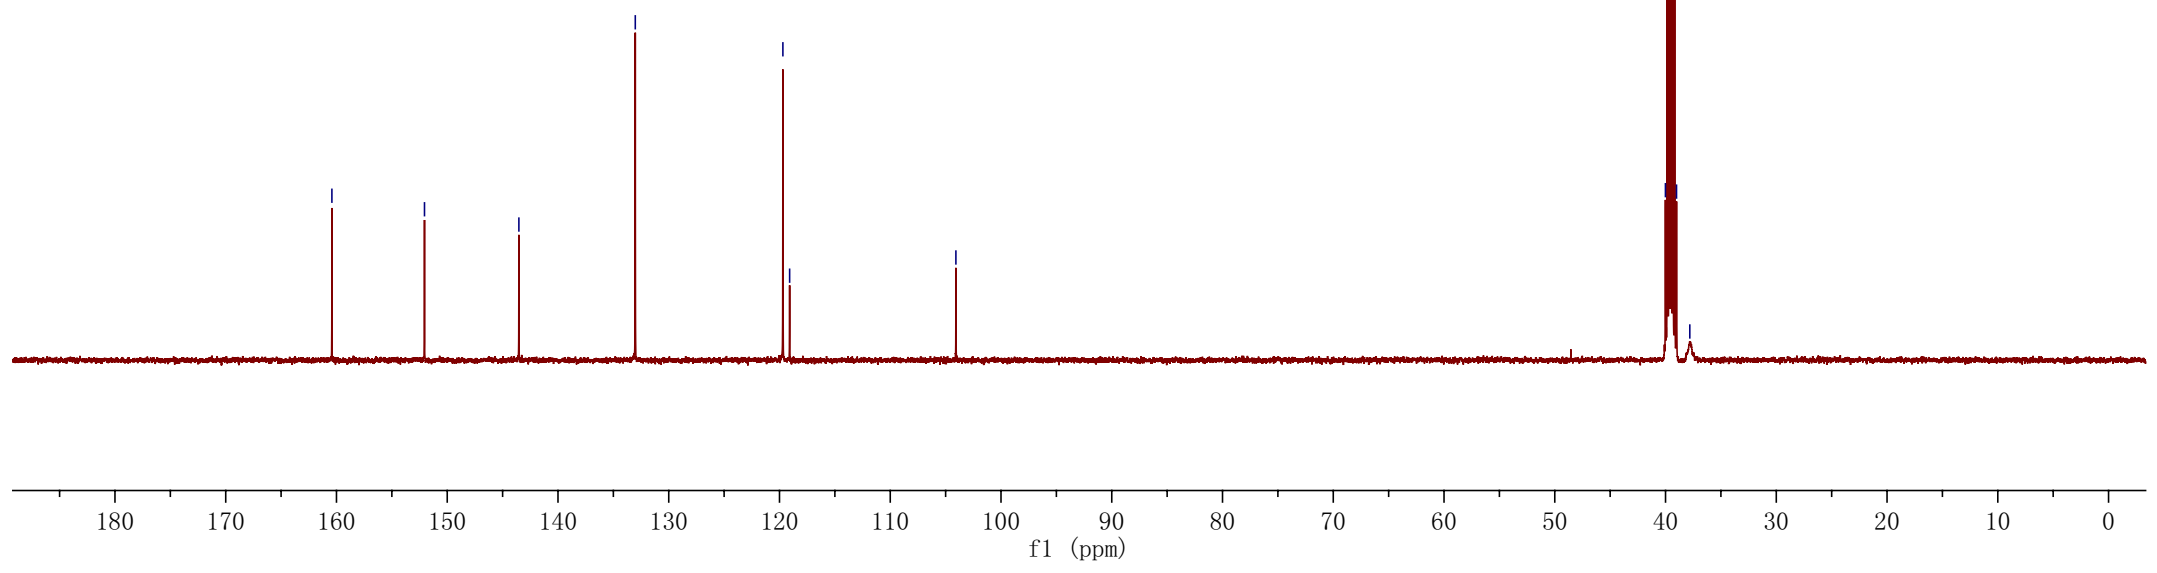

BAQ140318b DMSO

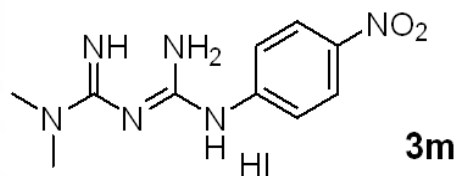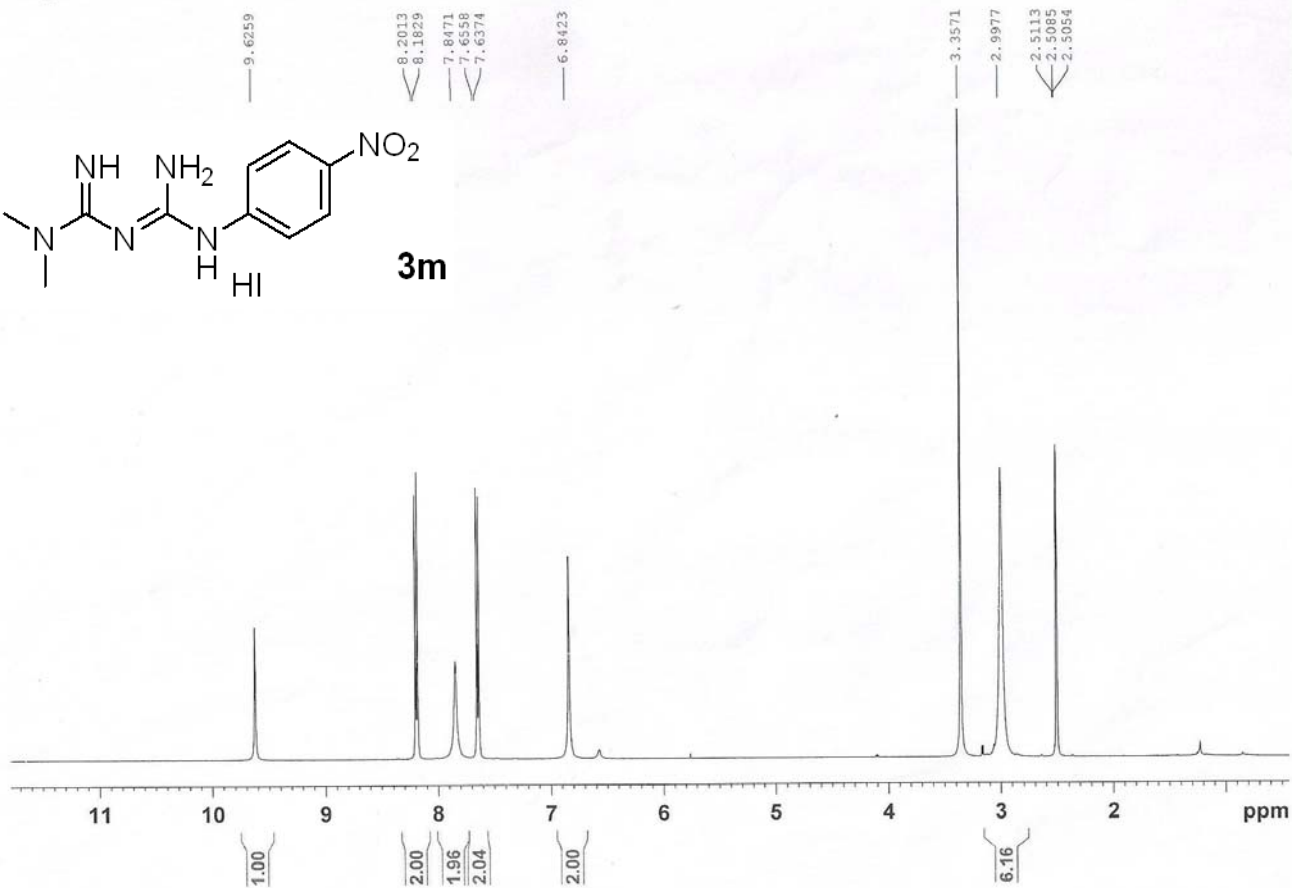

140324  
BAQ0318b DMSO

160.48

151.85

145.70

141.56

124.79

119.10

40.02

39.86

39.69

39.52

39.36

39.19

39.02

37.90

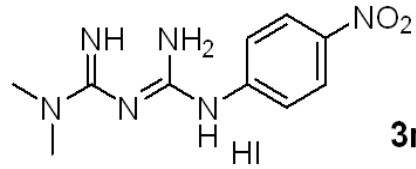

**3m**

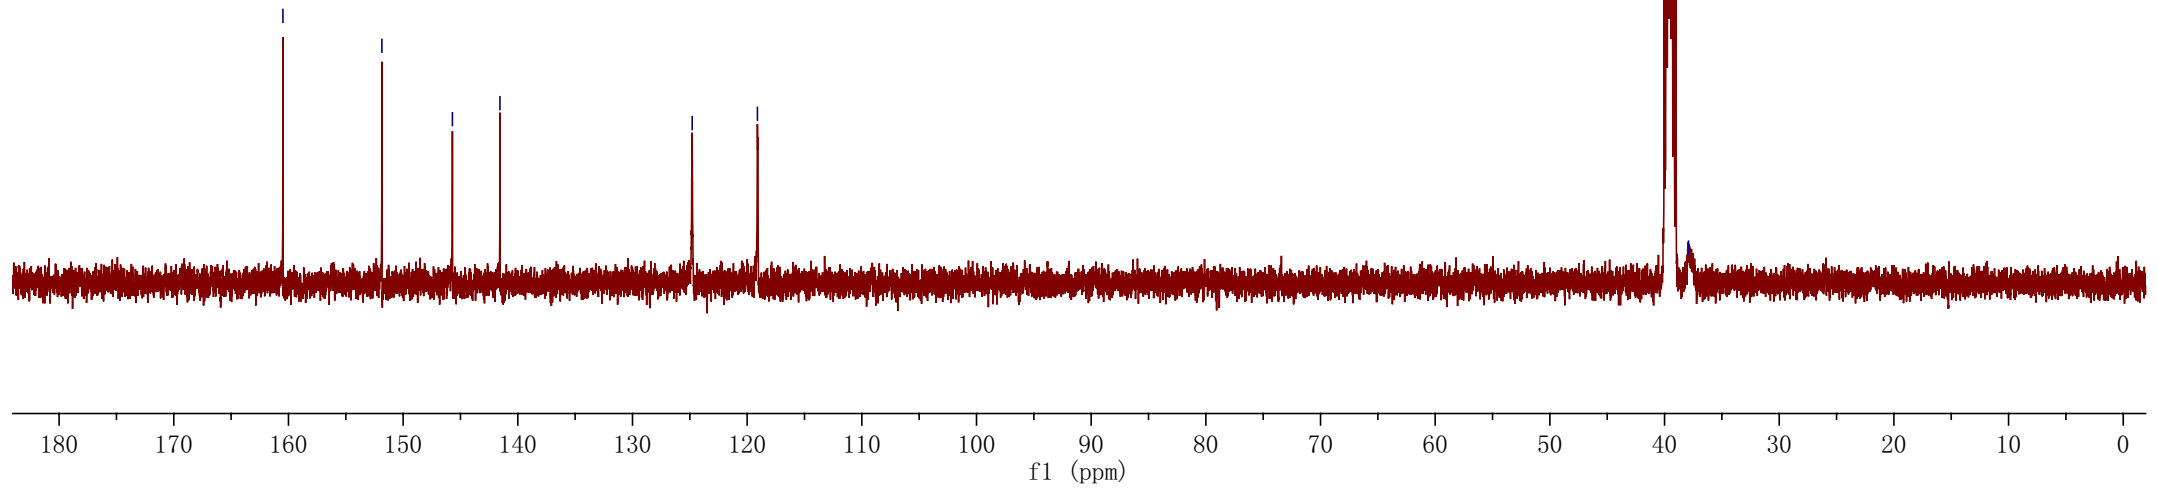

140110  
BAQ131224b DMSO

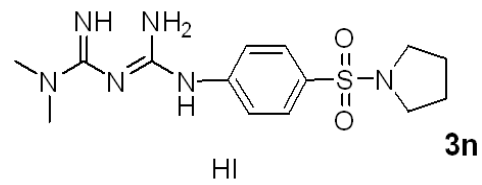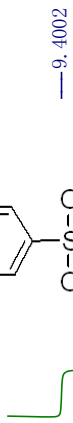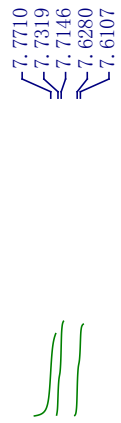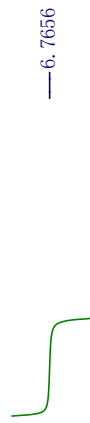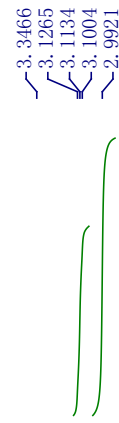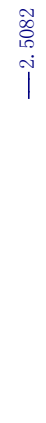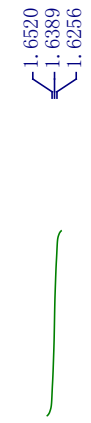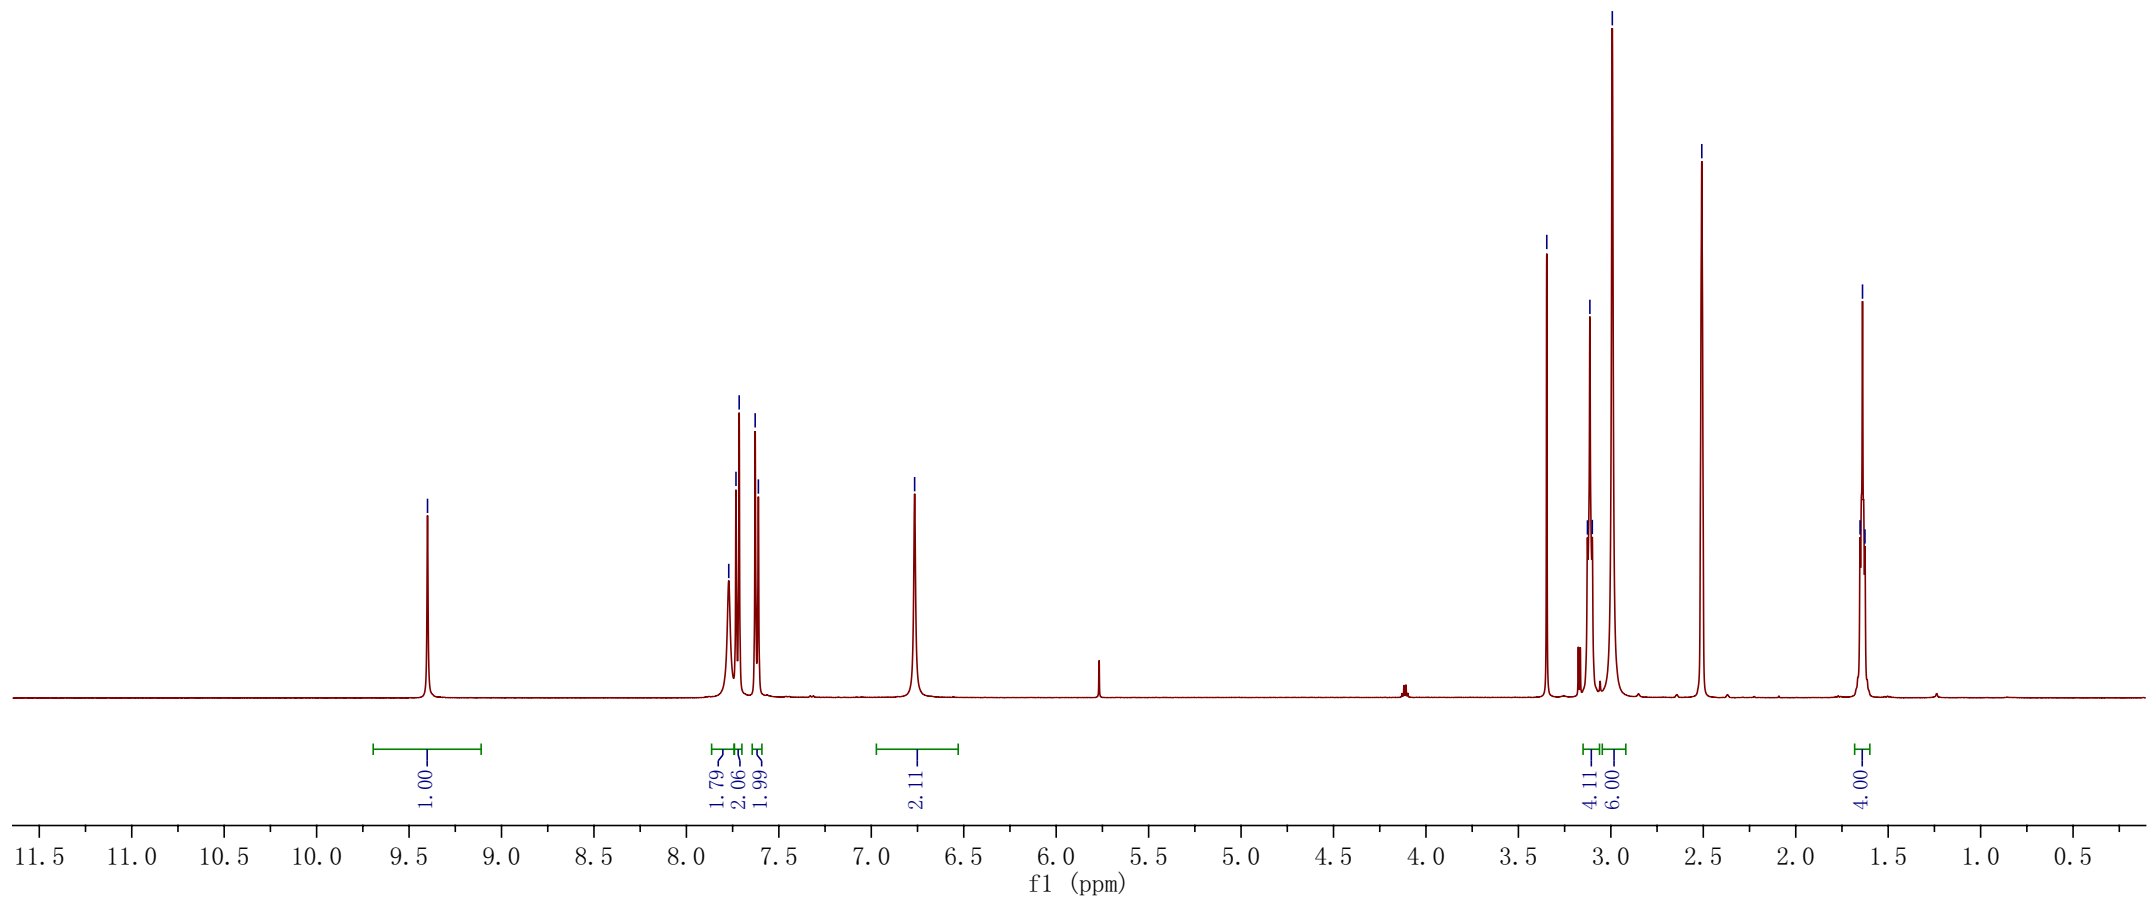



140312  
BAQ131224b DMSO

160.4163

152.2887

143.2851

129.4109

128.3856

119.3997

47.7396

40.0253

39.8581

39.7816

39.6909

39.5241

39.3572

39.1901

39.0231

37.7005

24.6592

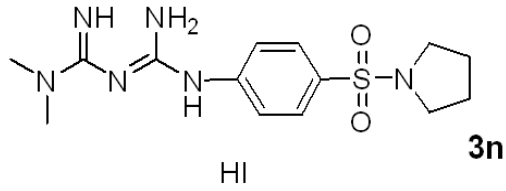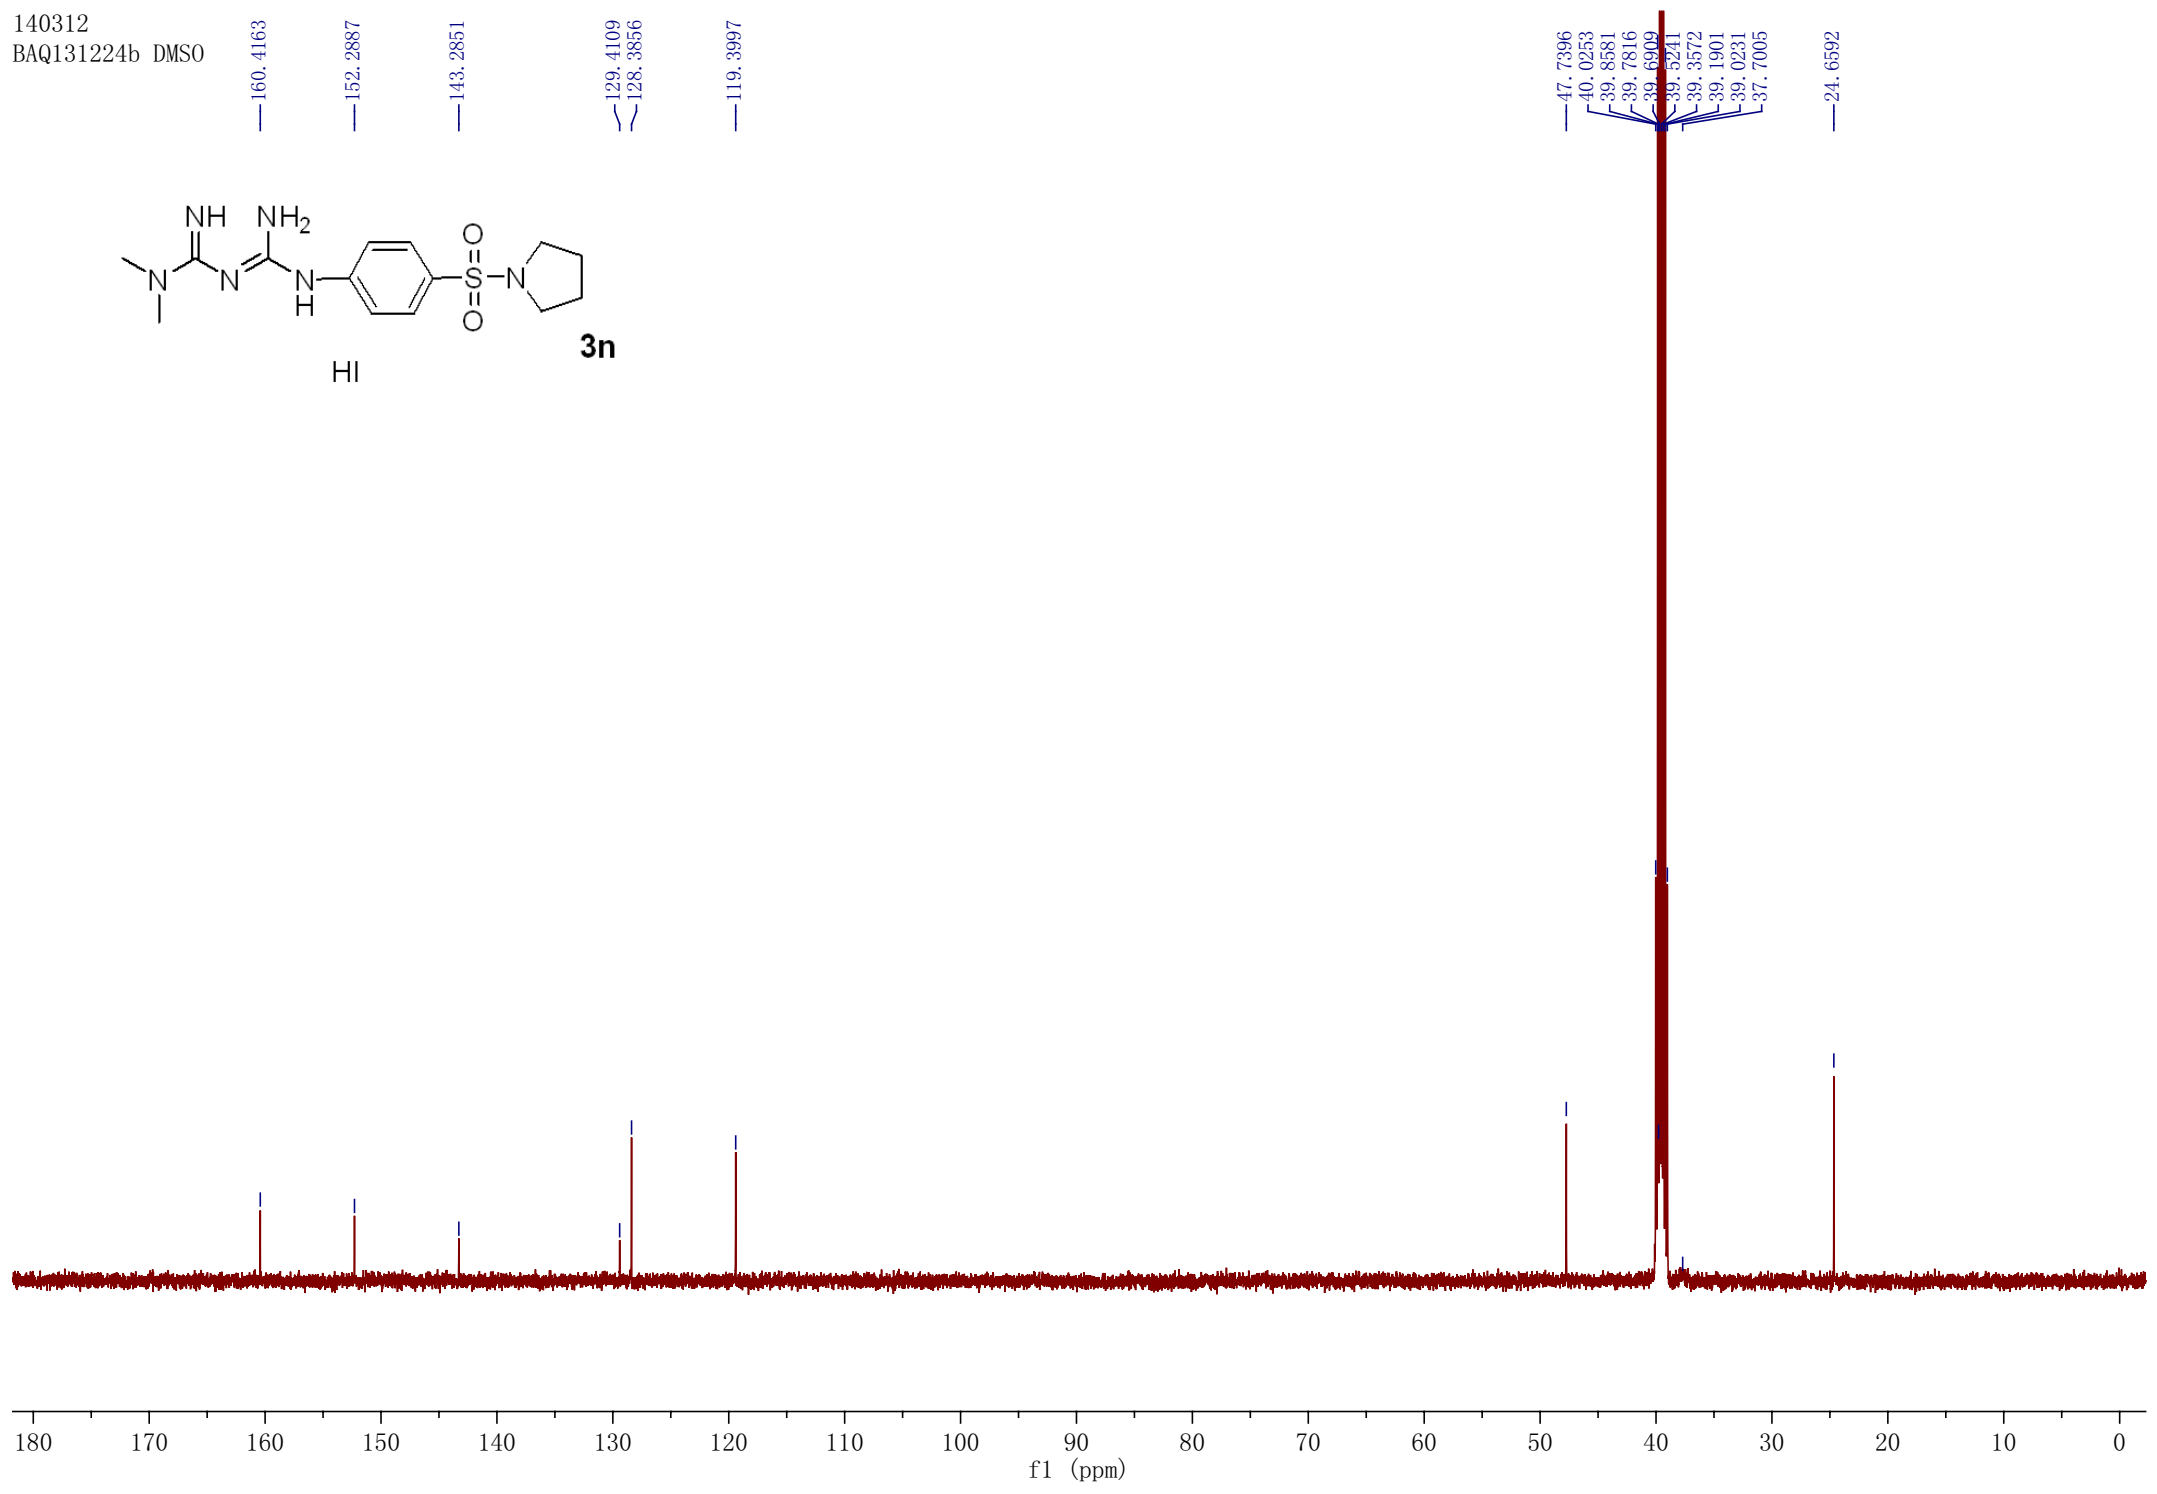

140312  
BAQ130301 DMSO

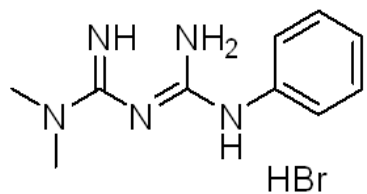

**3o**

9.4598

7.6190  
7.4018  
7.3864  
7.2992  
7.2840  
7.2677  
7.0357  
7.0211  
7.0064  
6.8060

3.3785

2.9697

2.5084

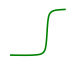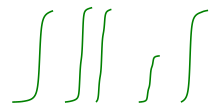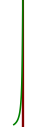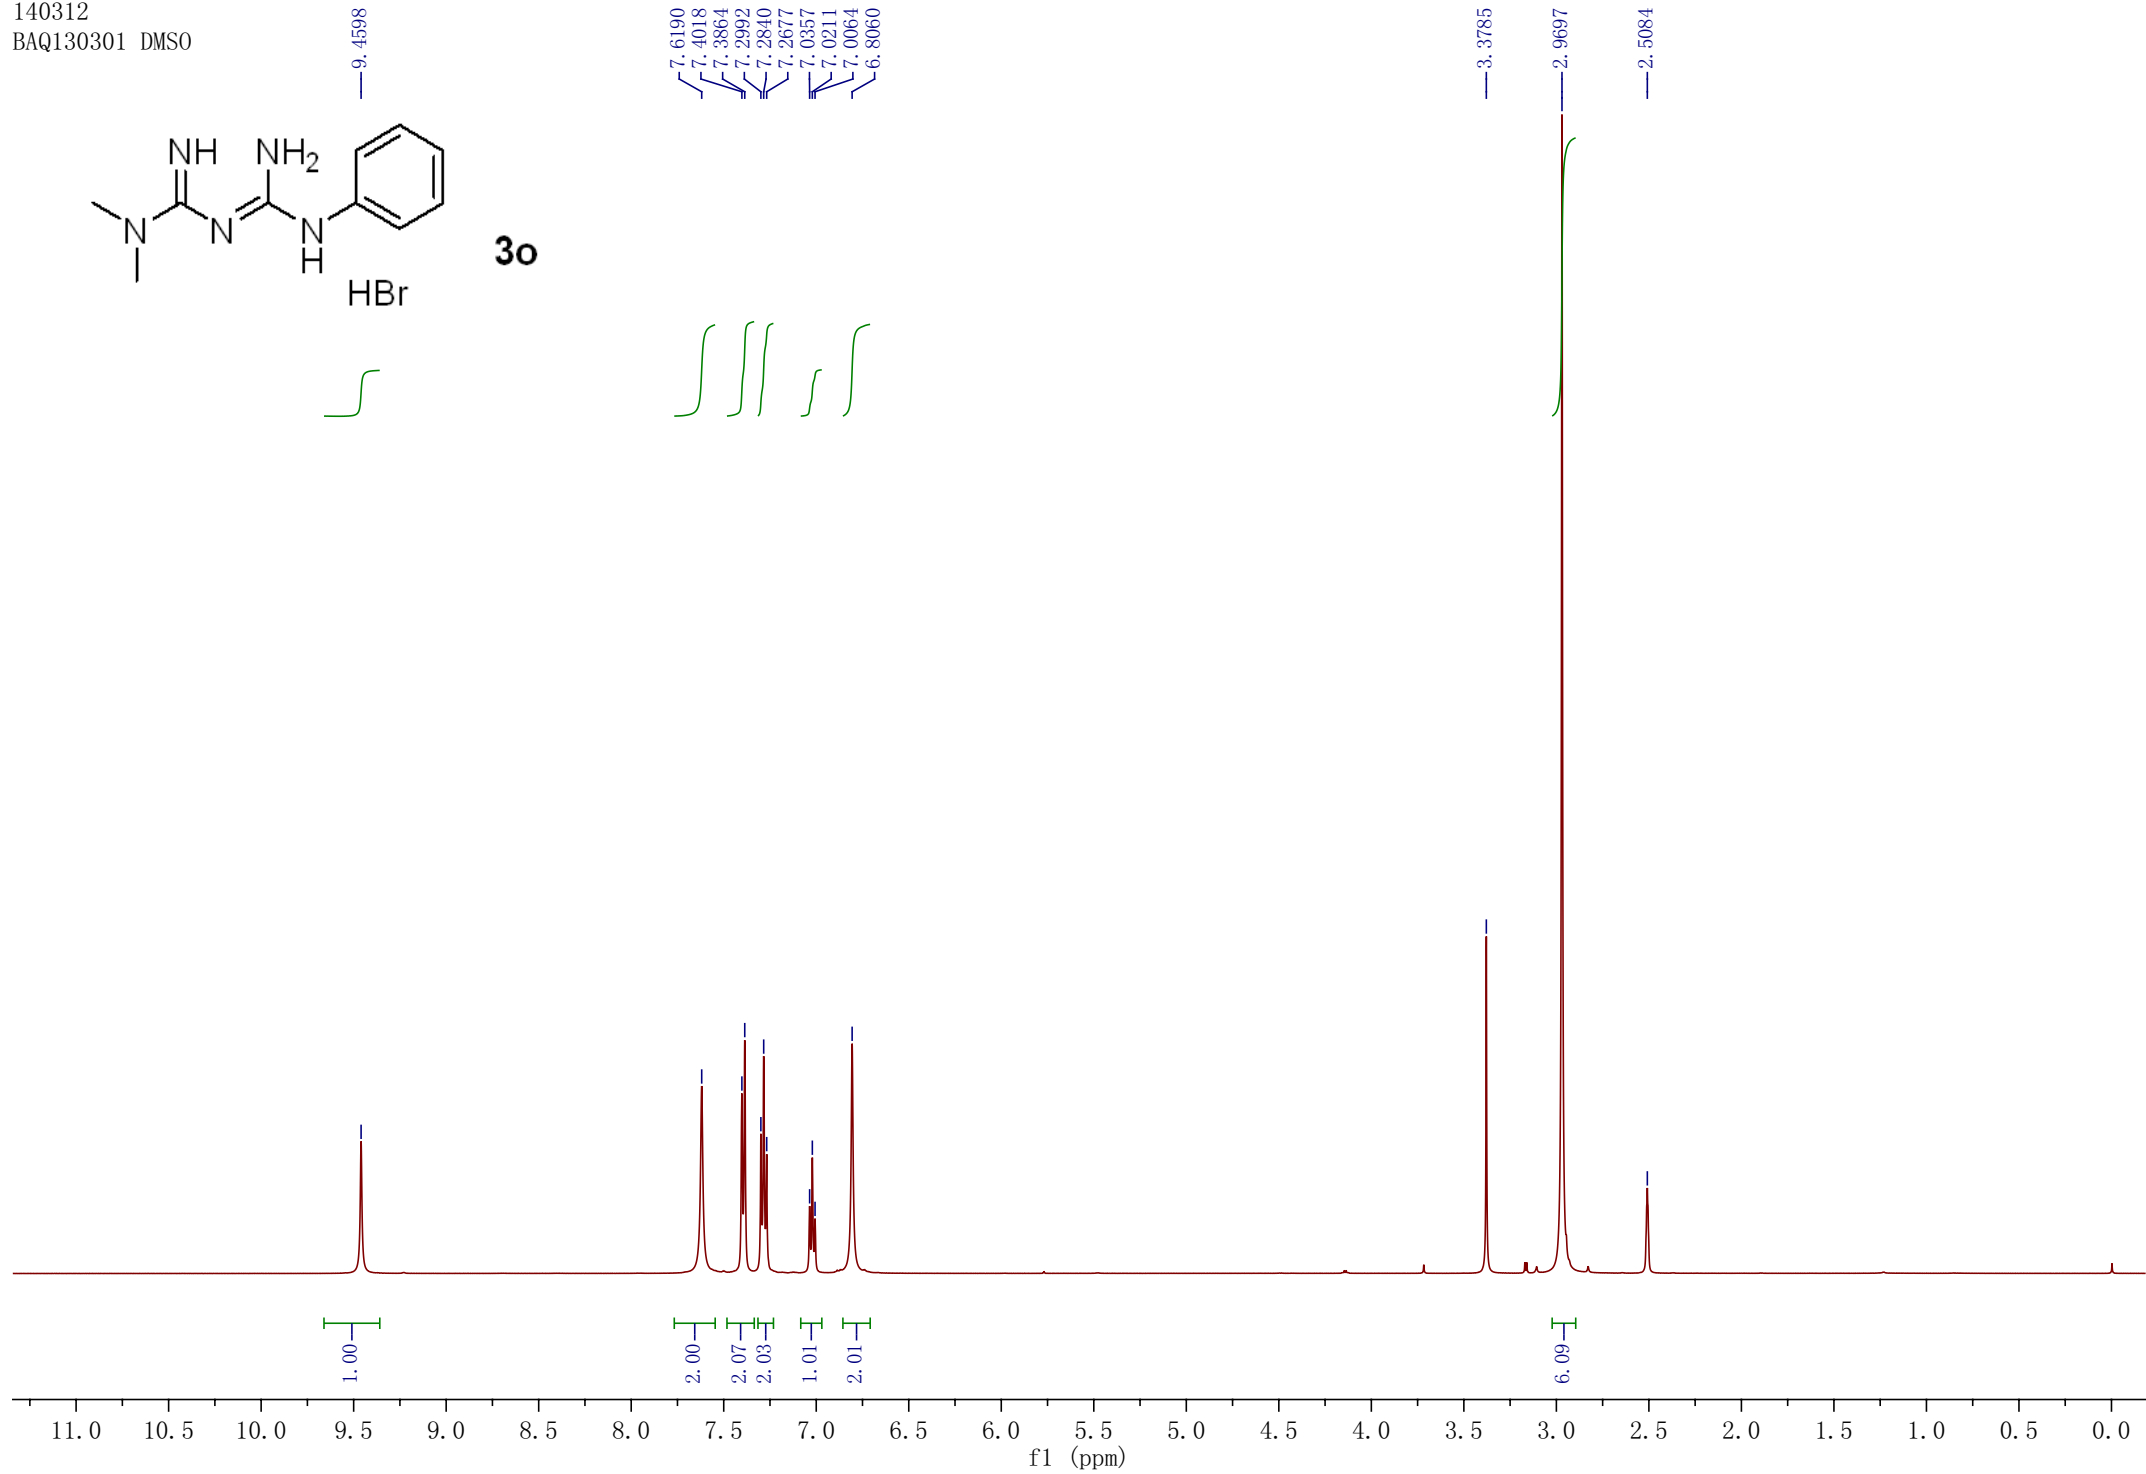

140314  
BAQ130301 DMSO

160.1579

153.4196

138.8909

128.5909

122.9386

120.3570

40.0230

39.8562

39.6893

39.5222

39.3553

39.1884

39.0211

37.6714

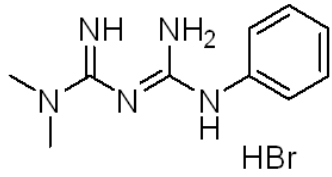

**3o**

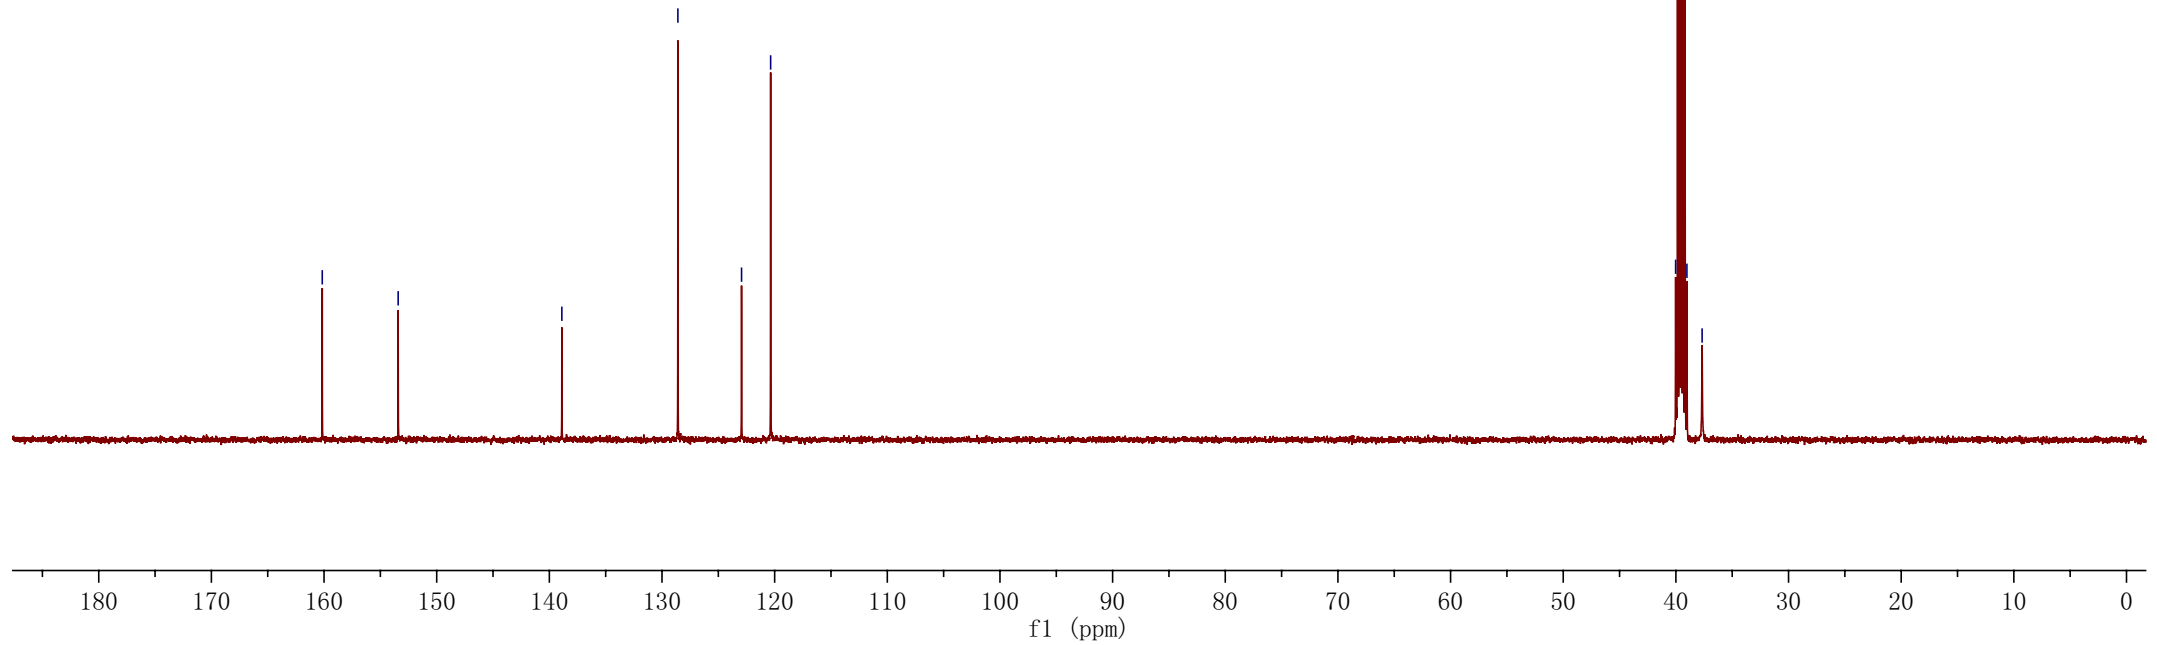

140312  
BAQ140228 DMSO

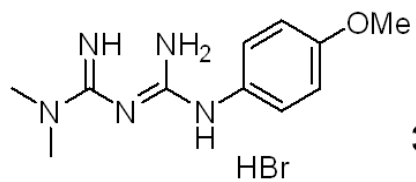

3p

9.5307

7.5187

7.2810

7.2633

6.8764

6.8587

6.8253

6.7396

3.7121

3.3971

2.9468

2.9301

2.5083

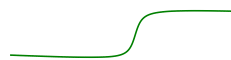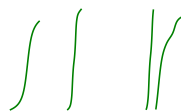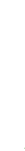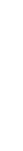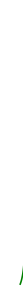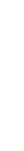

0.95

1.93

2.19

2.18

2.04

3.00

6.02

11.0 10.5 10.0 9.5 9.0 8.5 8.0 7.5 7.0 6.5 6.0 5.5 5.0 4.5 4.0 3.5 3.0 2.5 2.0 1.5 1.0 0.5

f1 (ppm)

140314  
BAQ140228 DMSO

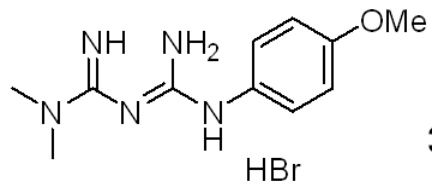

159.9894  
155.4749  
154.2541  
131.7118  
122.7068  
113.8473  
55.2196  
40.0230  
39.8565  
39.6896  
39.5225  
39.3556  
39.1886  
39.0216  
37.6189

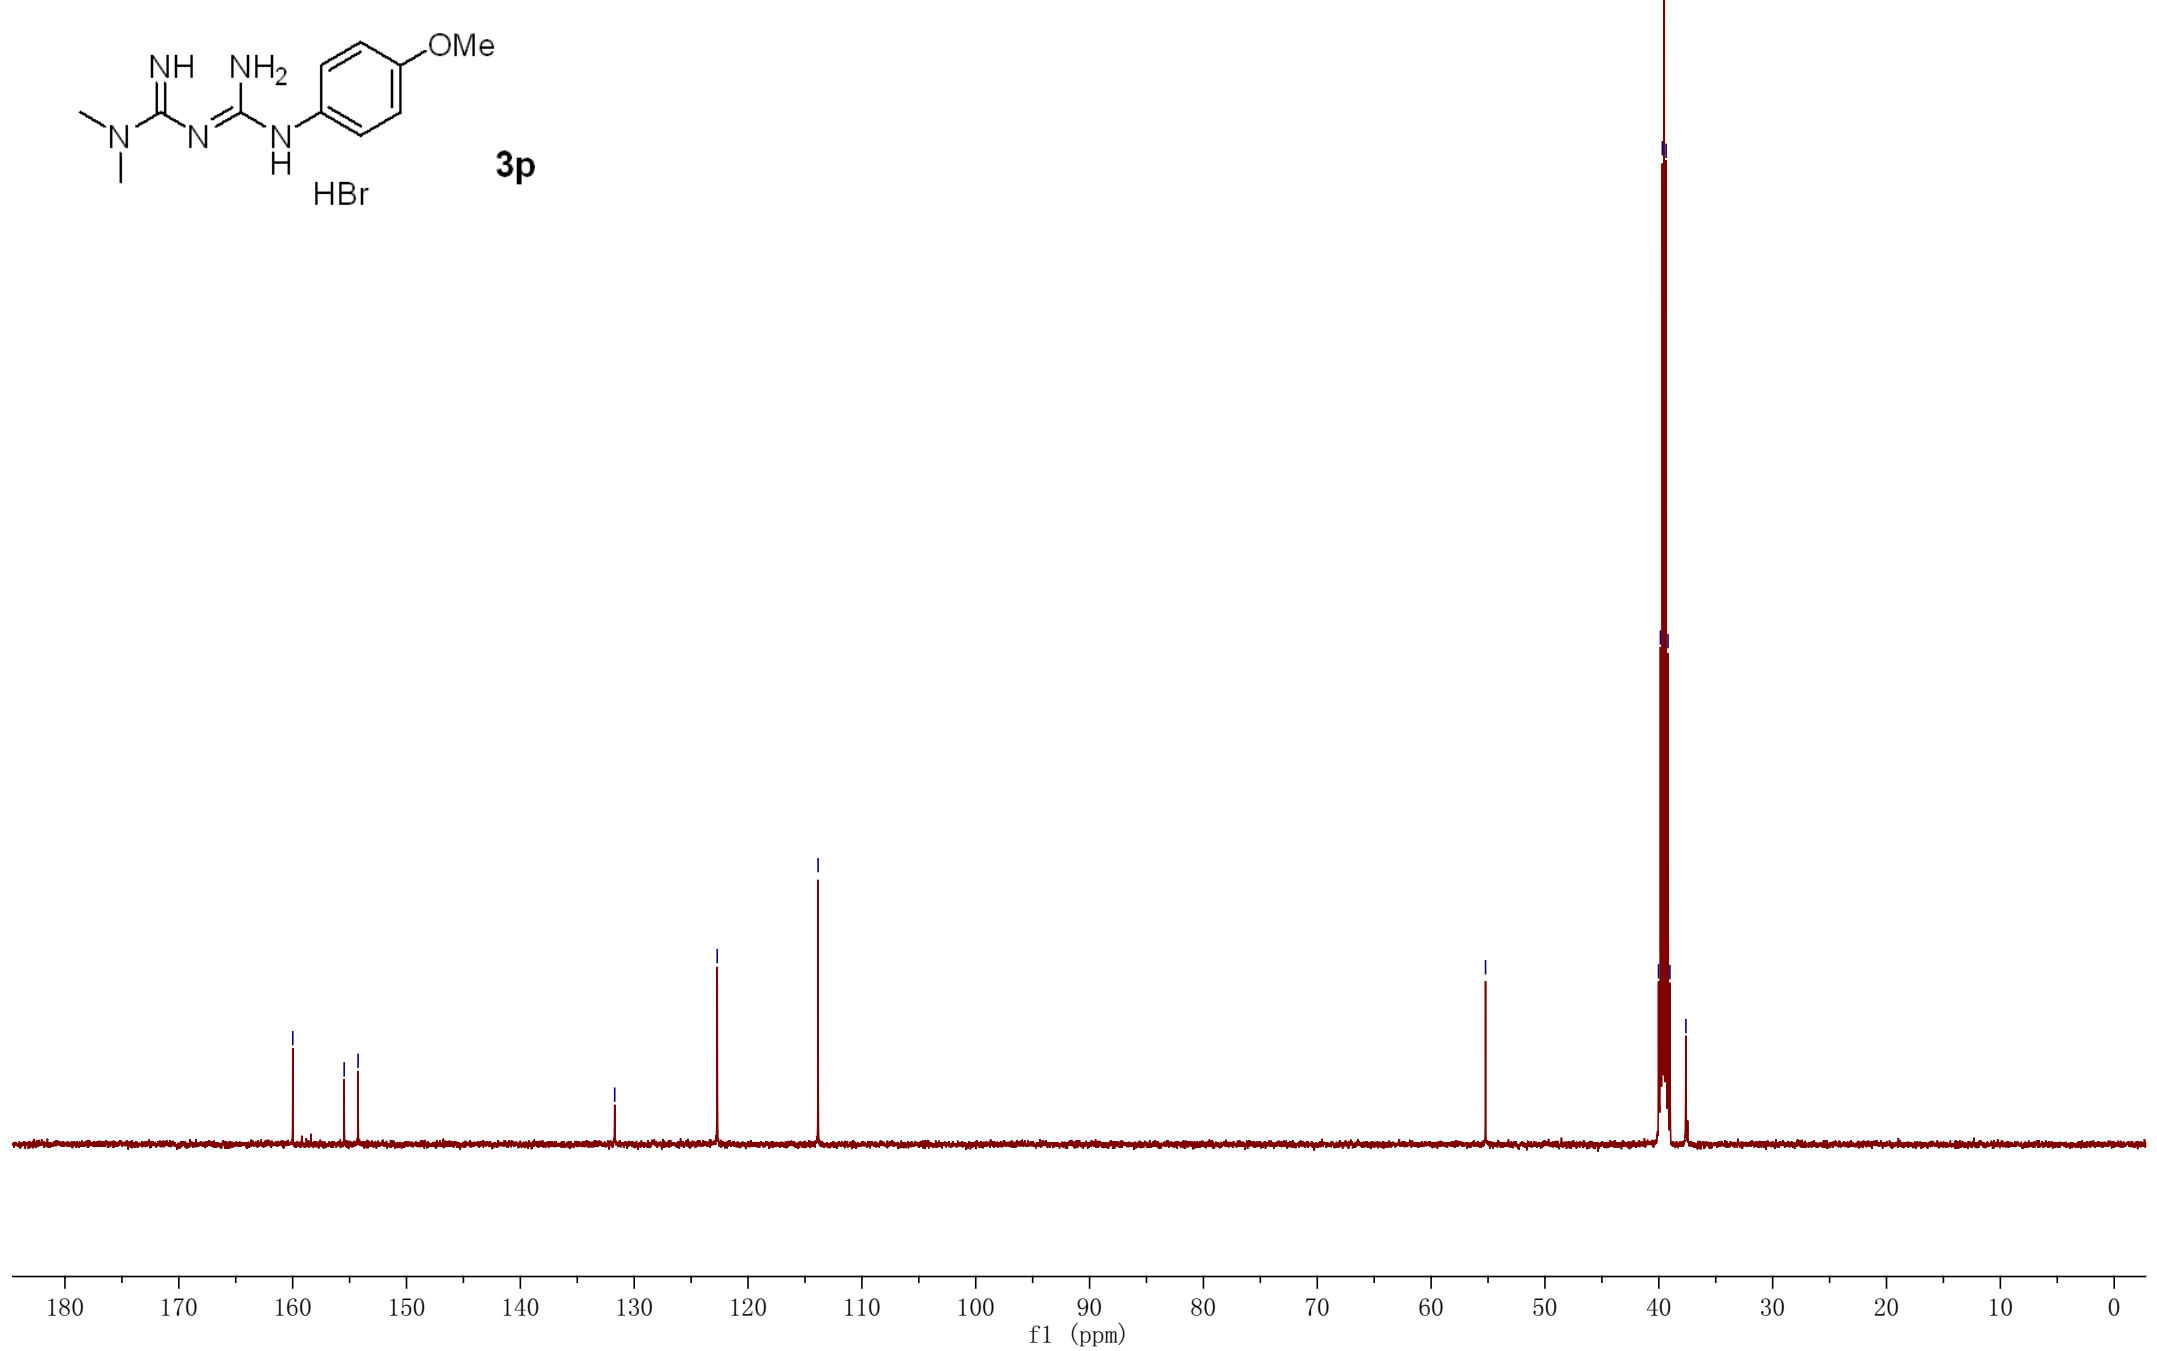

140325  
BAQ140323a DMSO

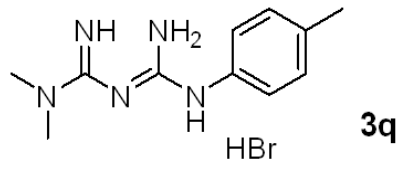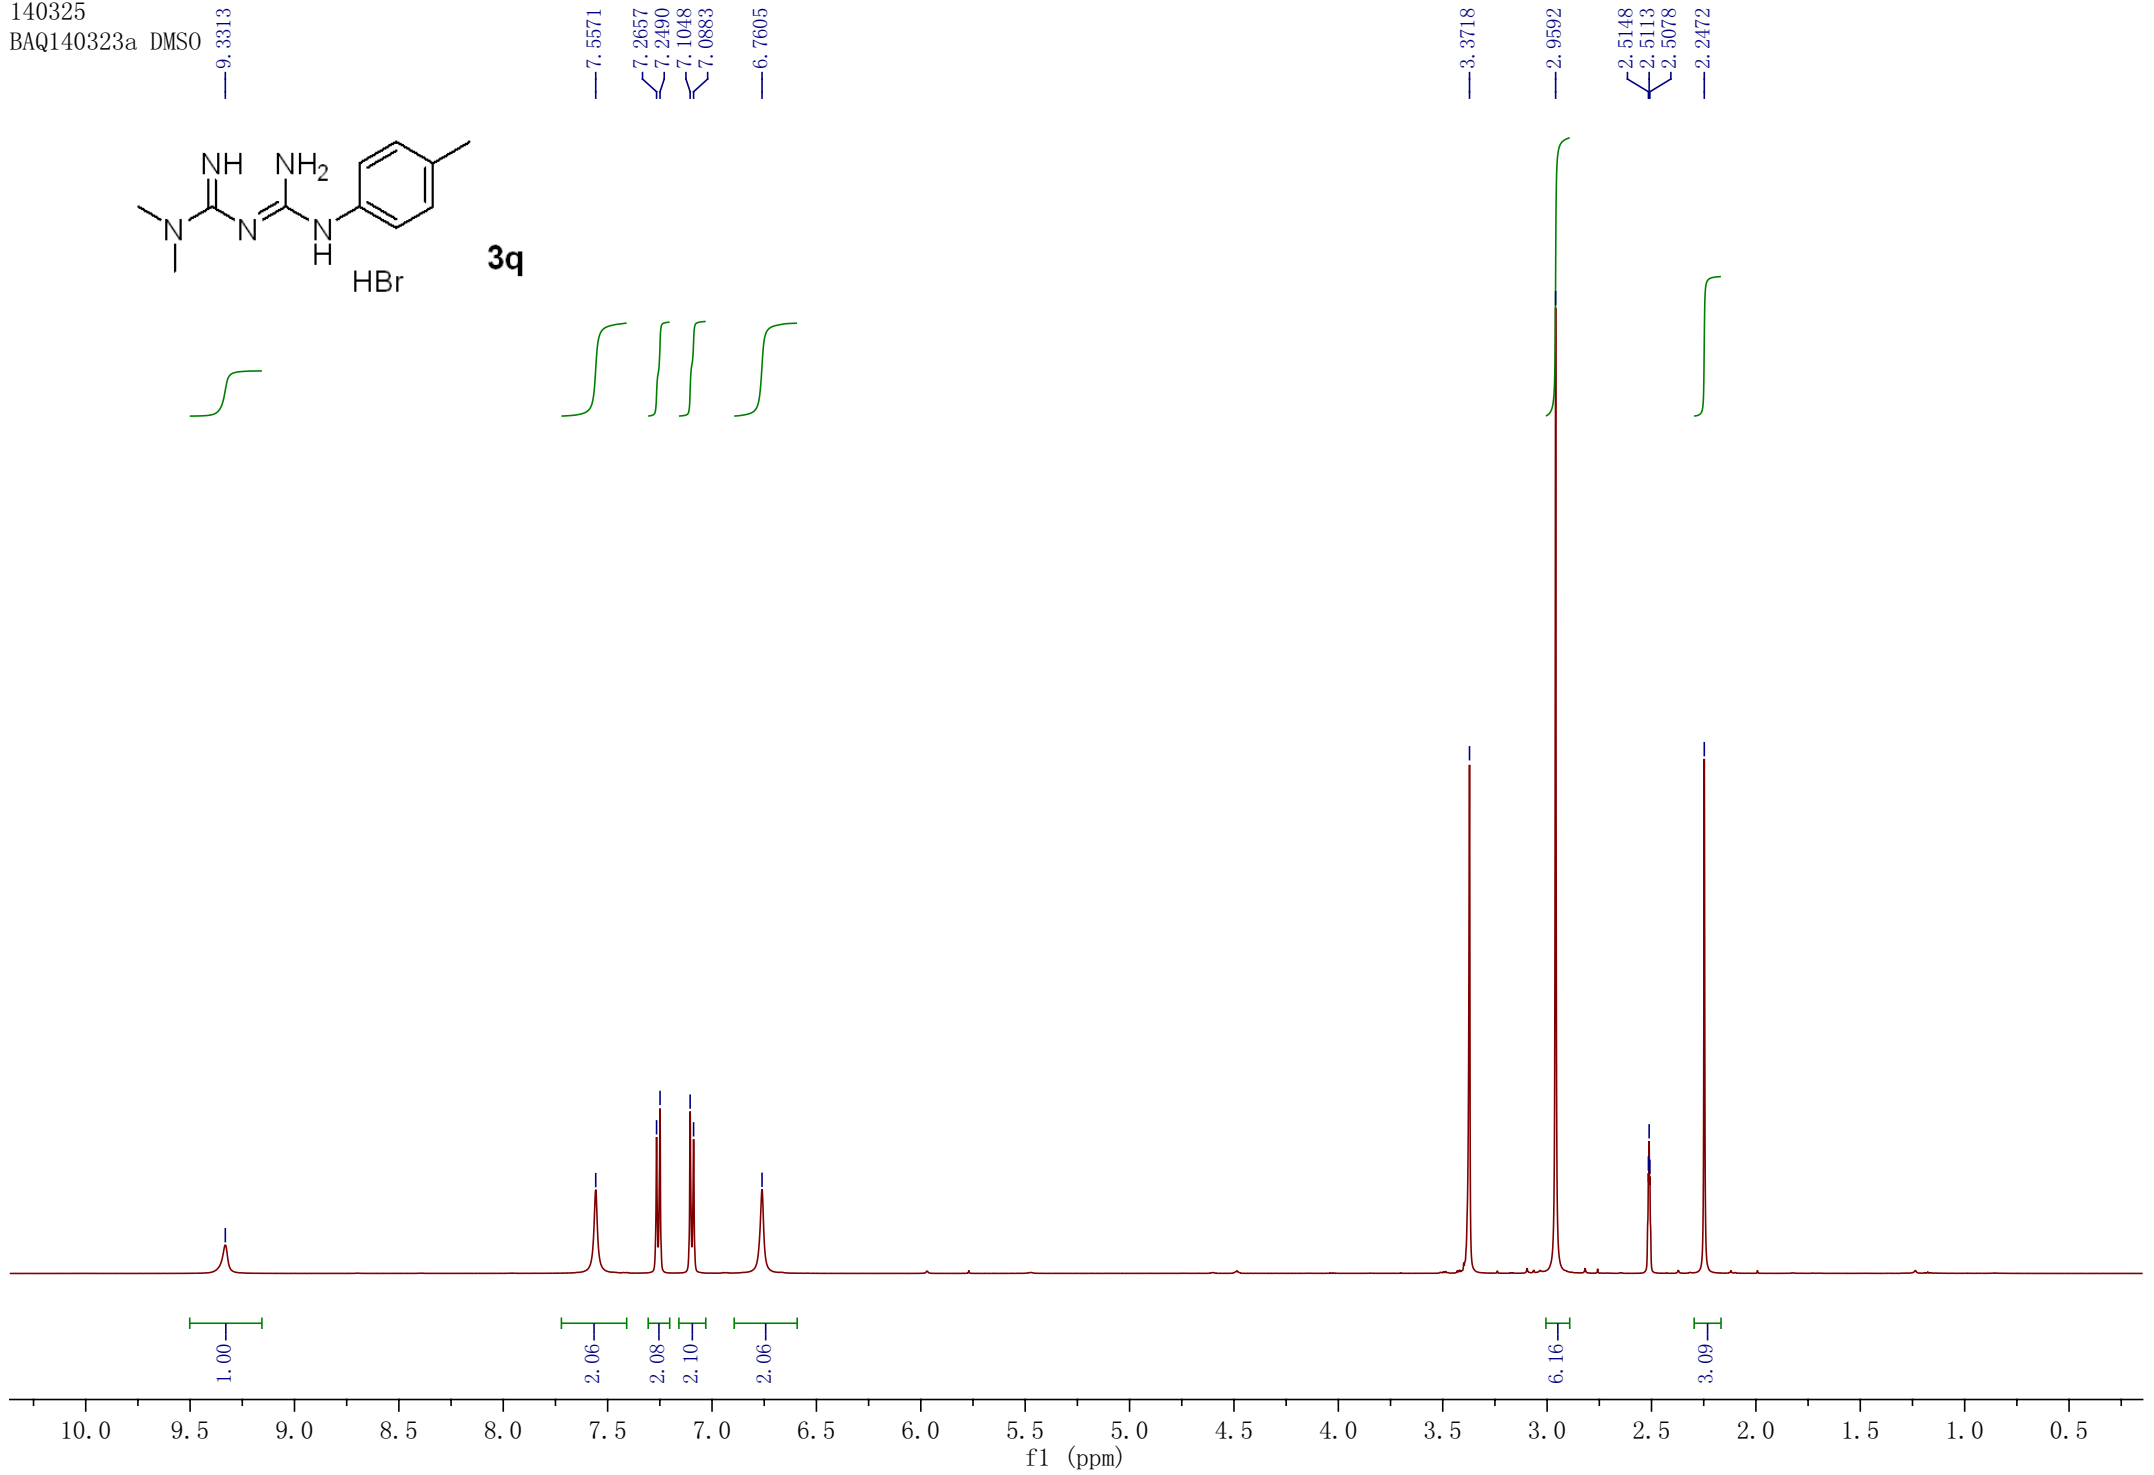

140326  
BAQ140323a DMSO

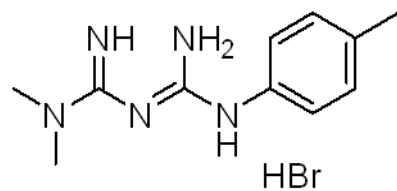

**3q**

—160.0588

—153.7284

—136.1967

—132.1264

—129.0211

—120.7569

40.0232  
39.8562  
39.6893  
39.5222  
39.3552  
39.1881  
39.0210  
37.6274

—20.3578

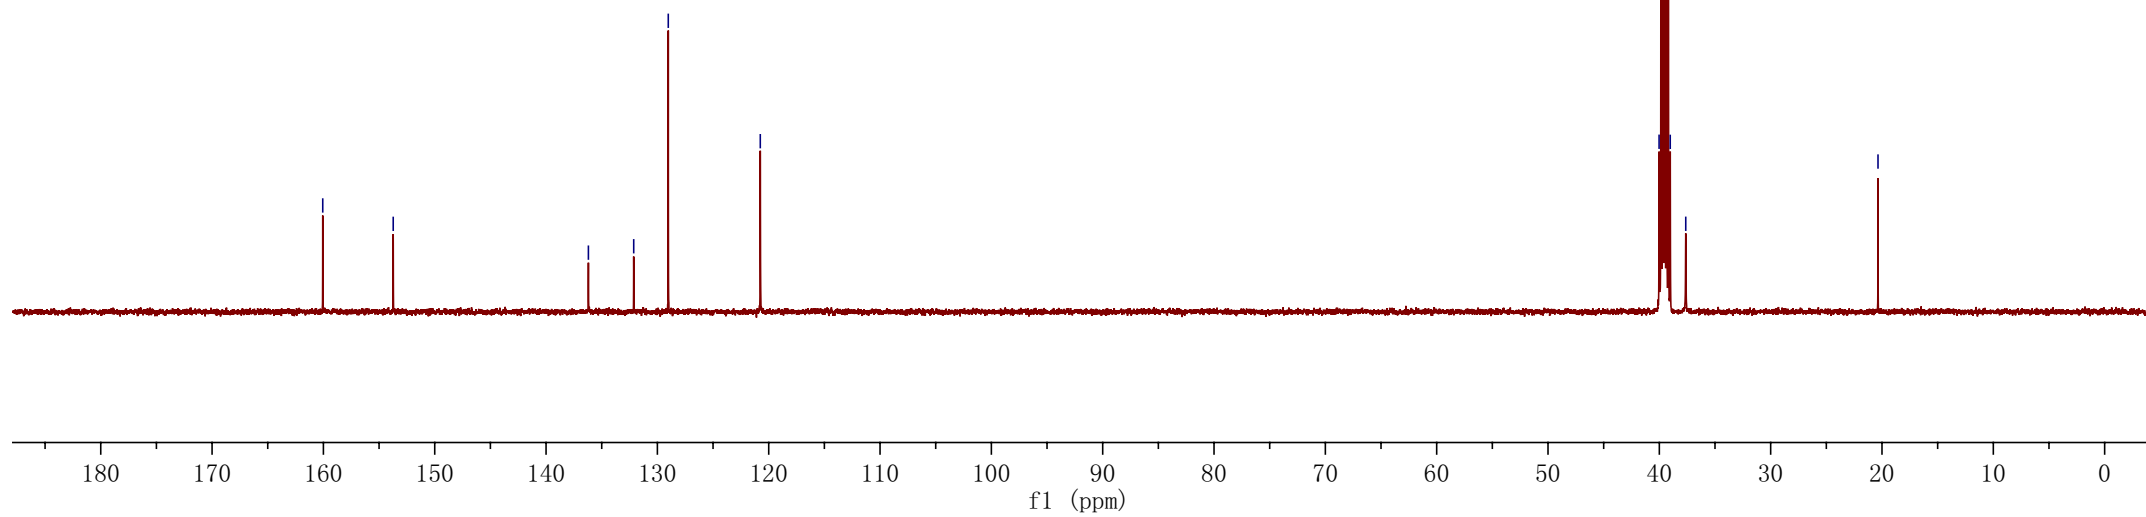

140324  
BAQ140319a DMSO

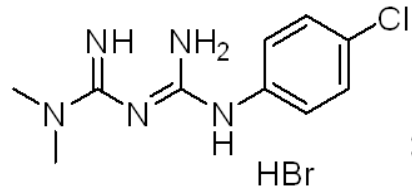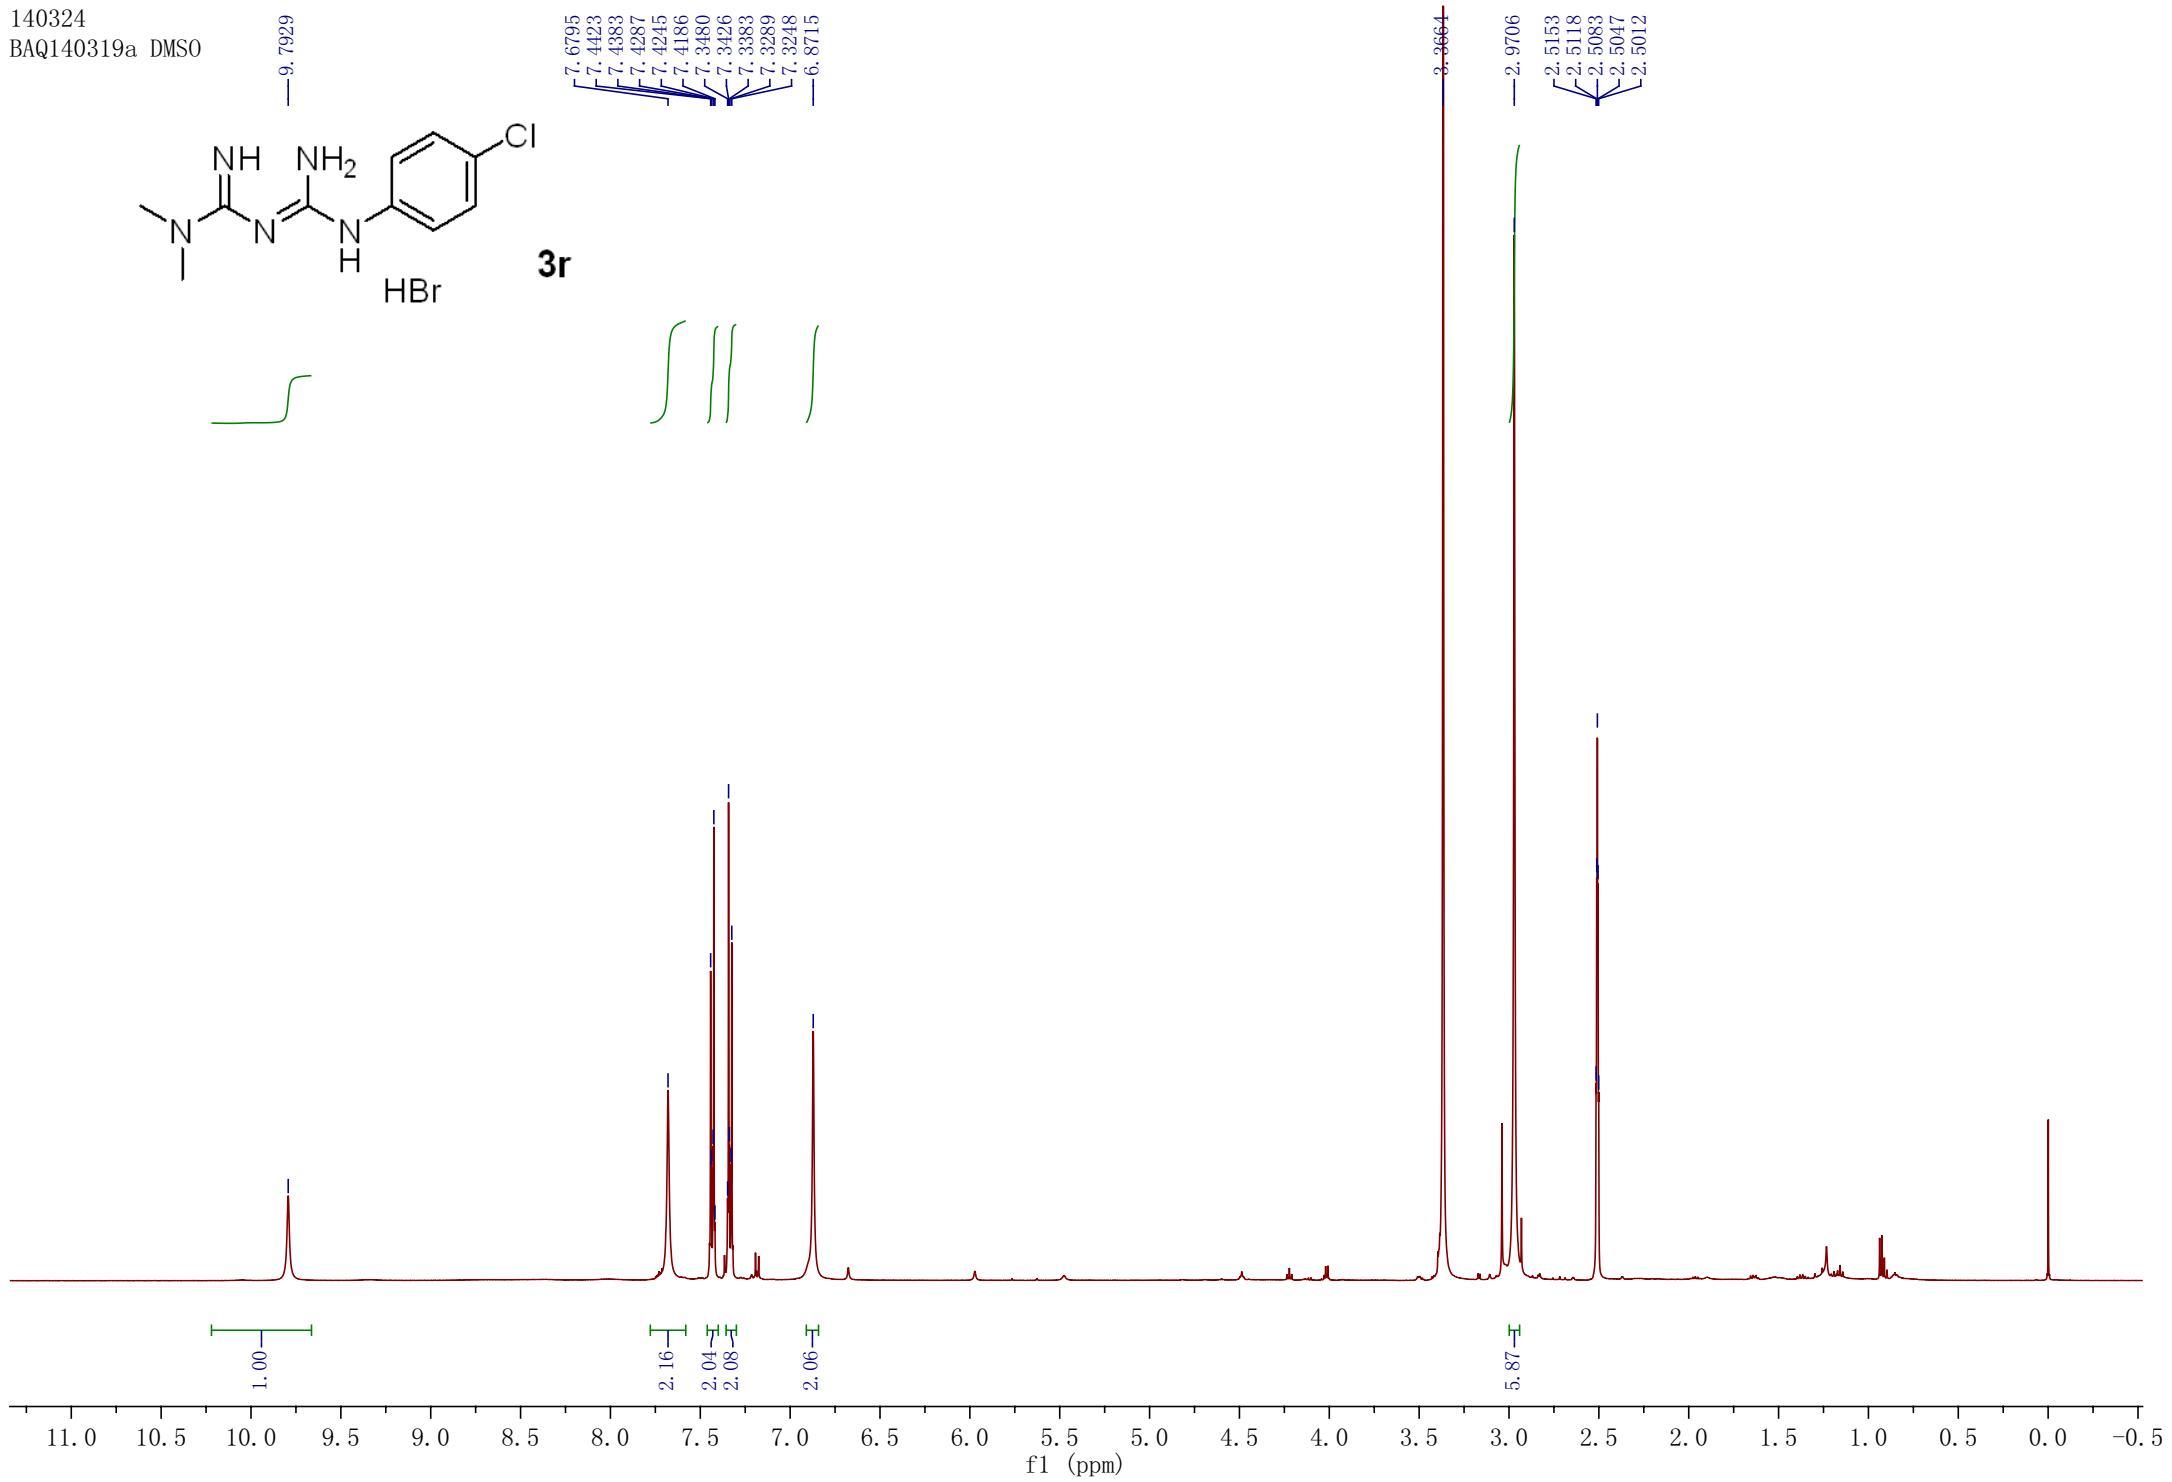



140328  
BAQ140319a DMSO

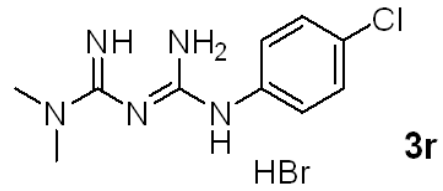

160.2911

153.1508

138.1095

128.4551

126.4335

121.6364

40.0214

39.8542

39.7781

39.6872

39.5203

39.3533

39.1863

39.0193

37.6907

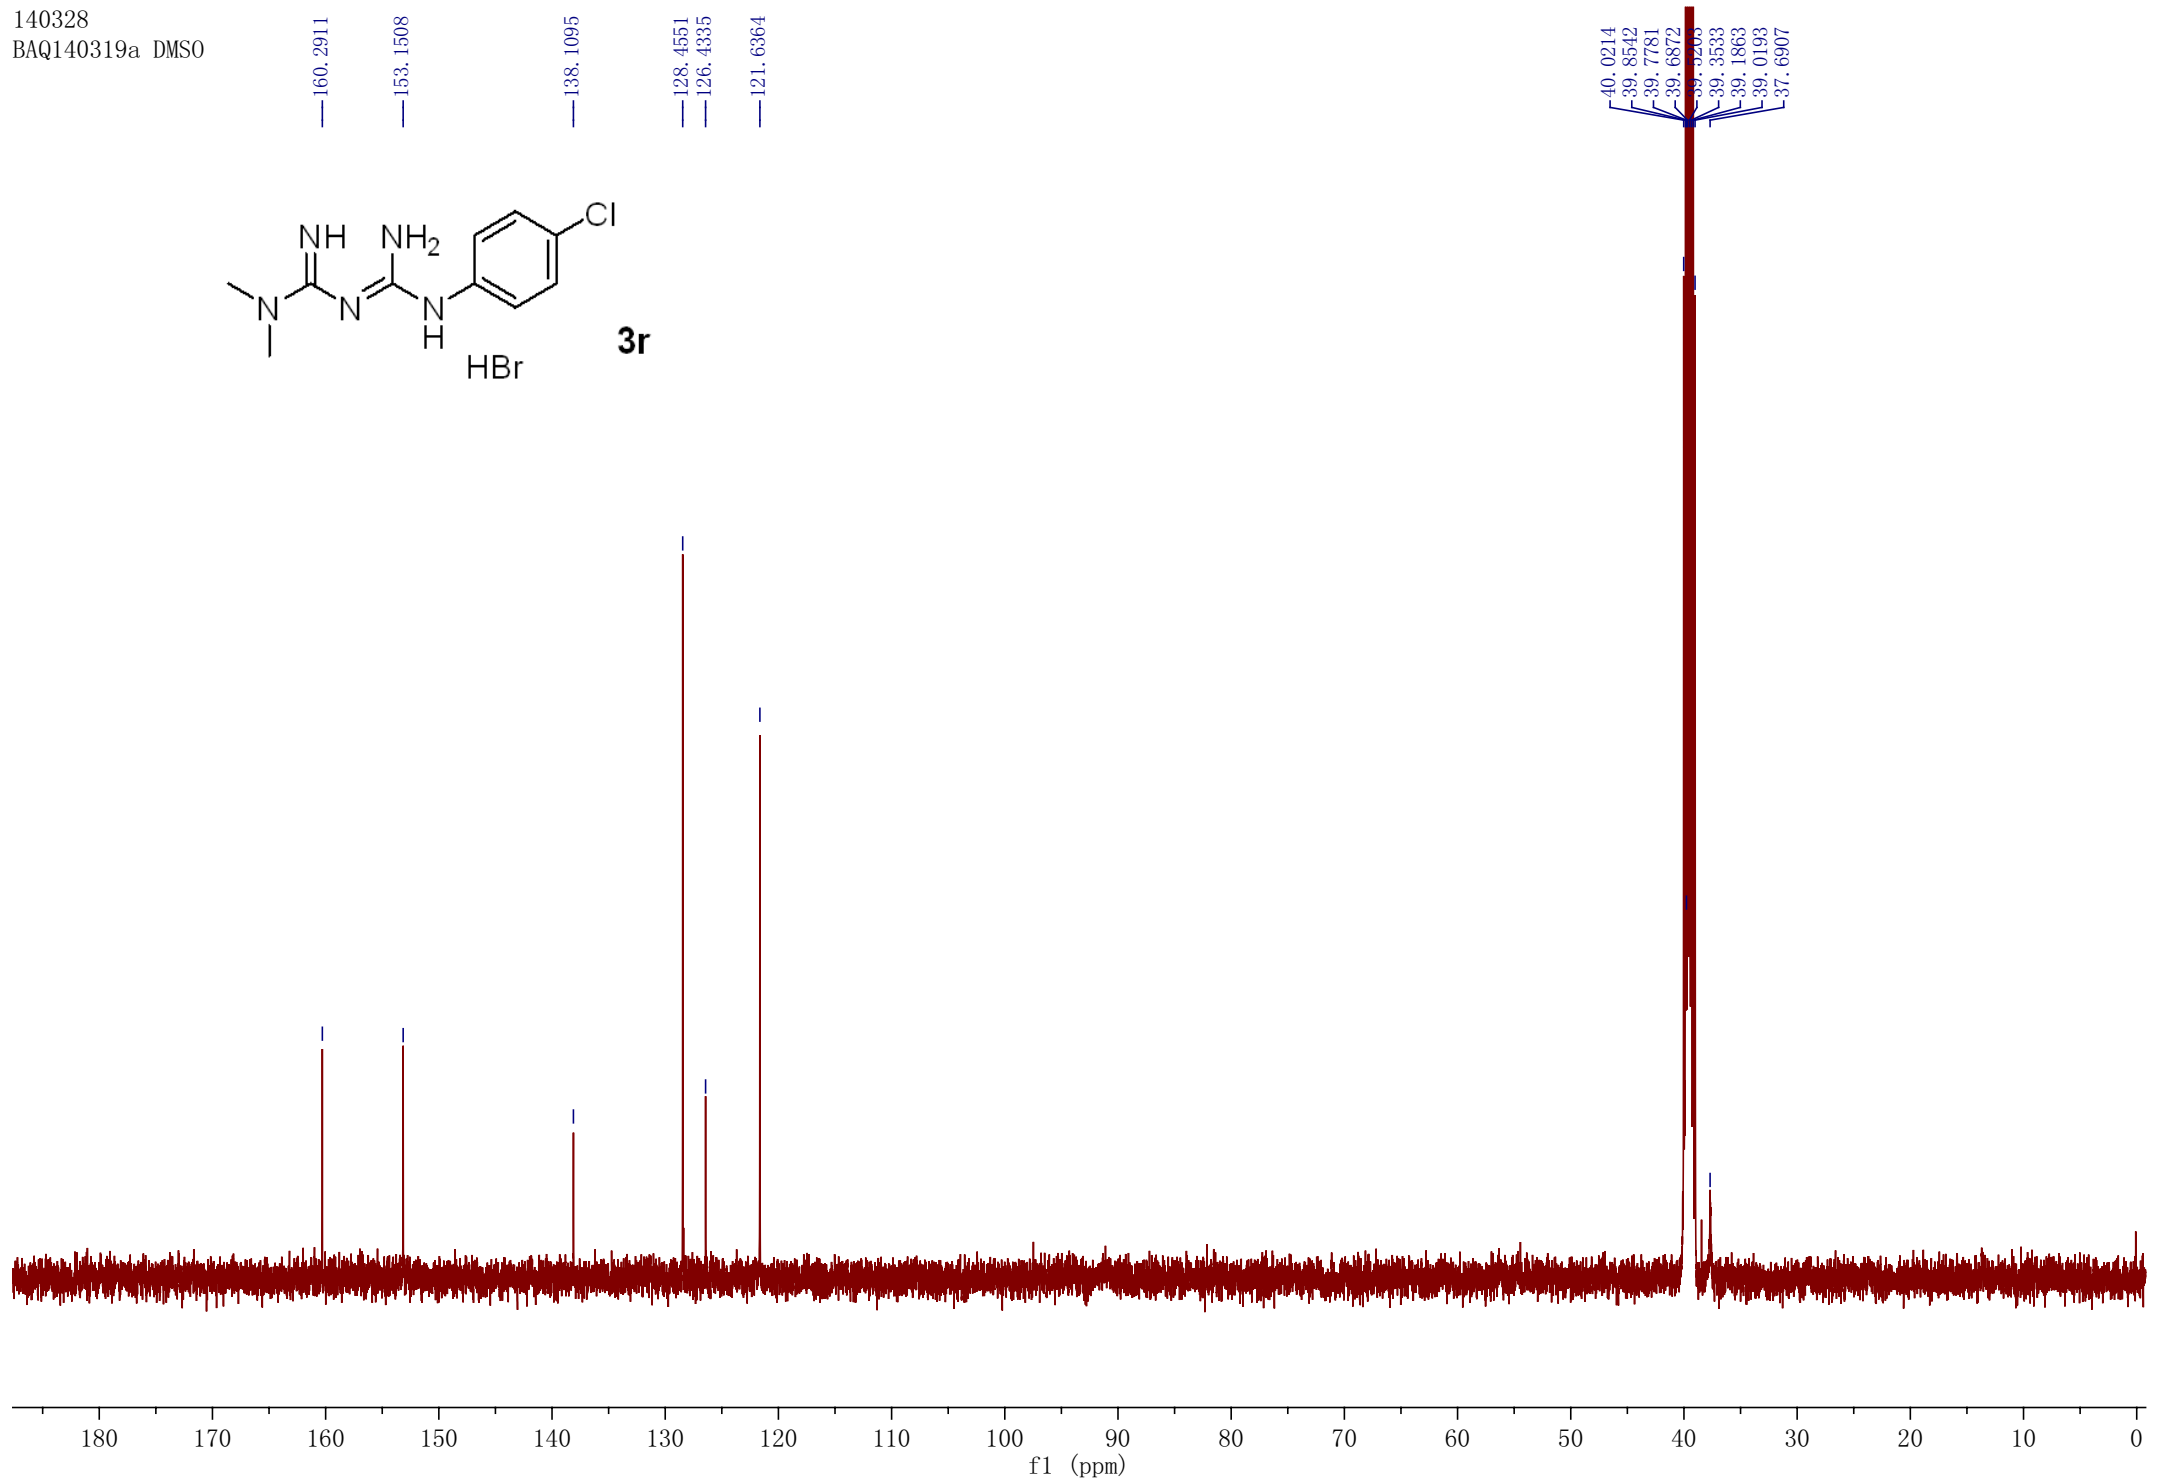

140324  
BAQ140320 DMSO

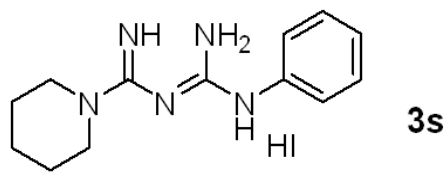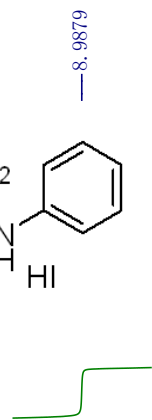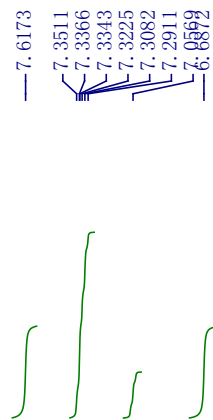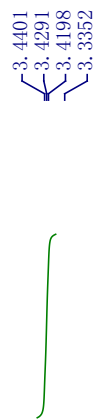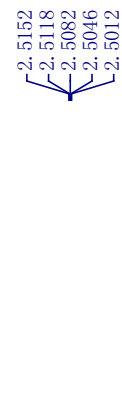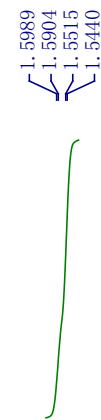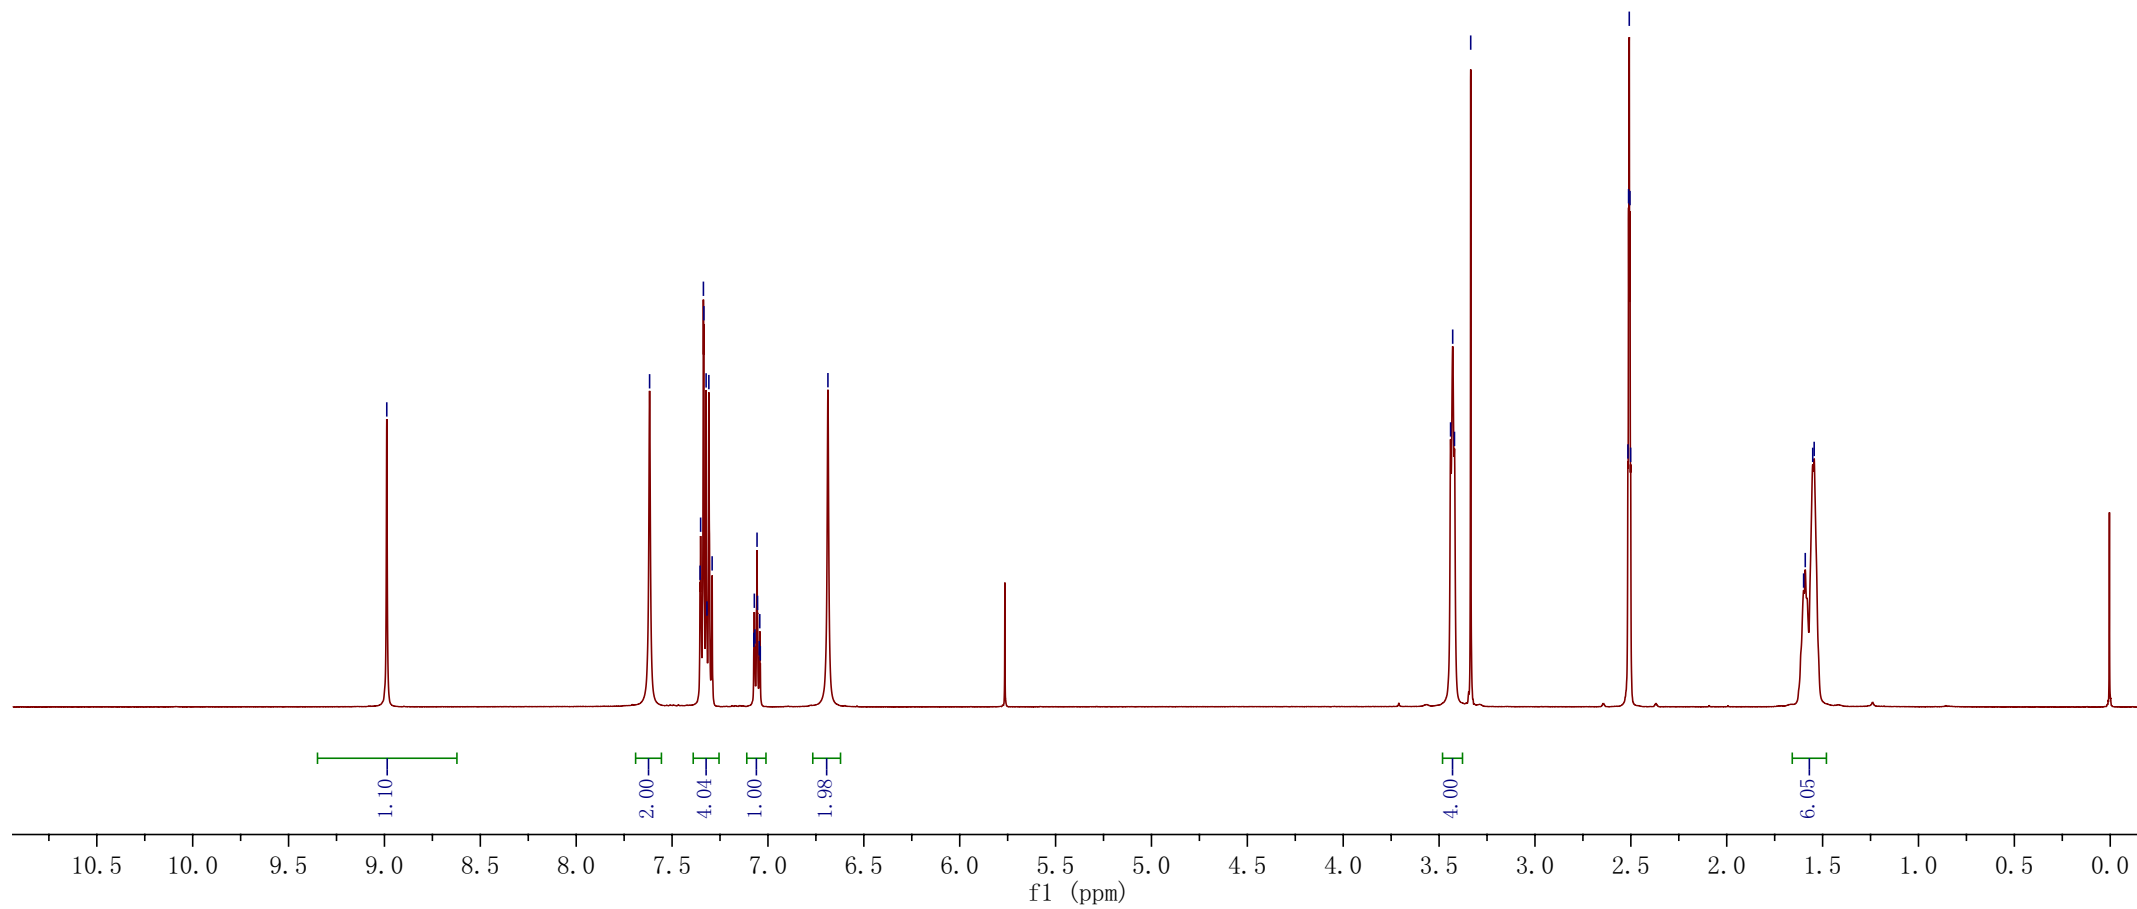

140328  
BAQ140320 DMSO

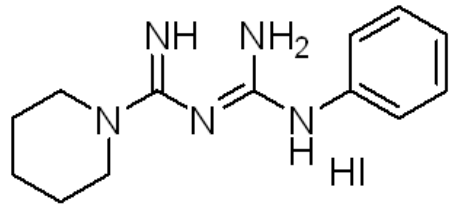

**3s**

158.3087

153.8820

138.5807

128.6907

123.3077

120.8716

45.8573

40.0191

39.8520

39.6852

39.5181

39.3512

39.1843

39.0171

24.9632

23.3954

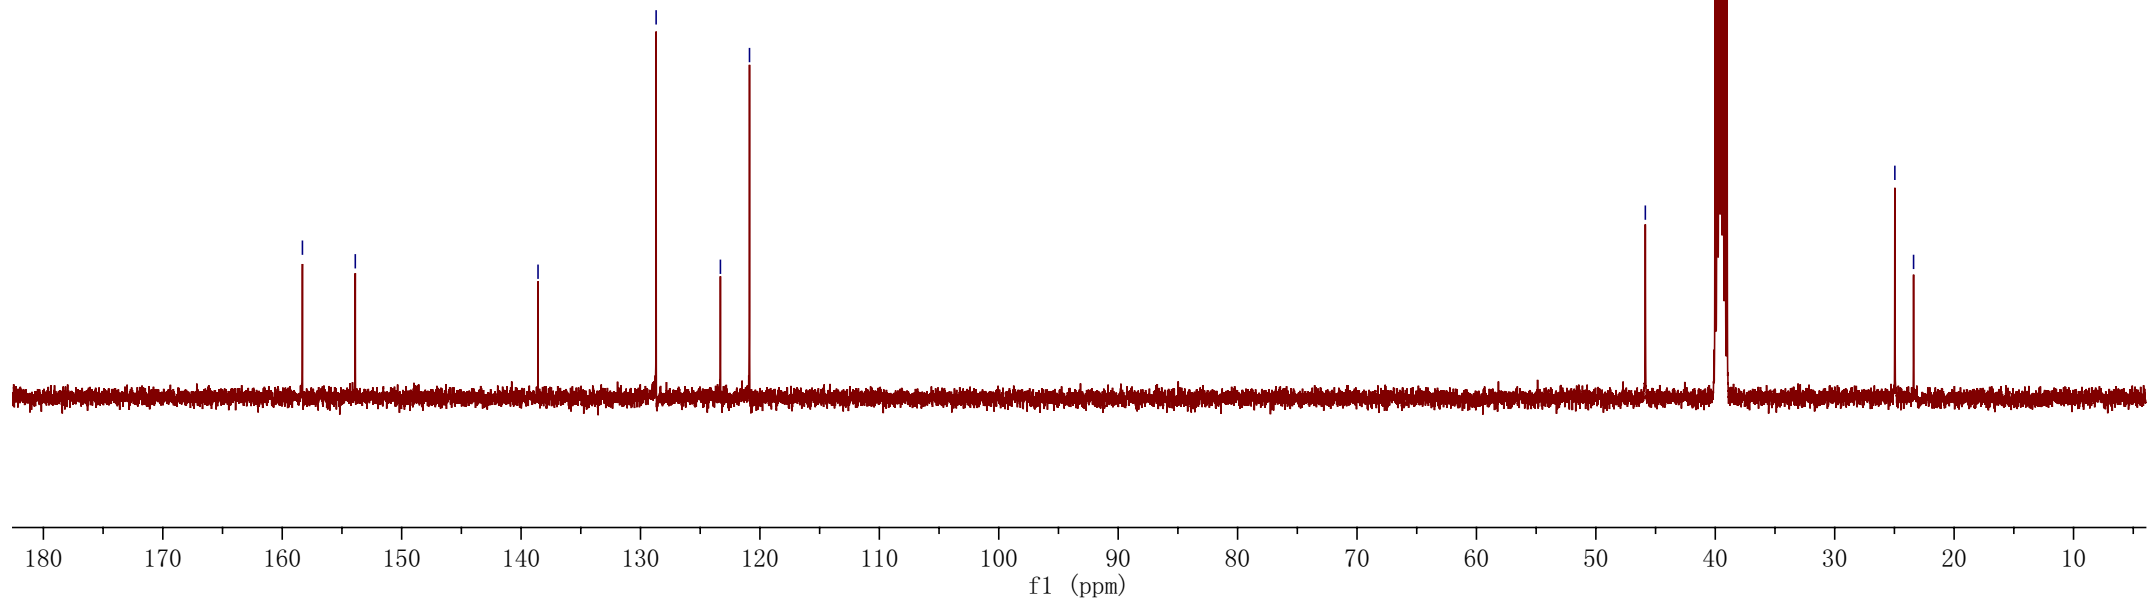

140505  
BAQ140421 DMSO

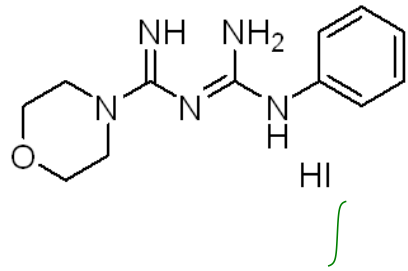

3t

9.1341

7.7073

7.3225

7.2955

7.0687

6.8396

3.6309

3.4428

3.3684

2.5085

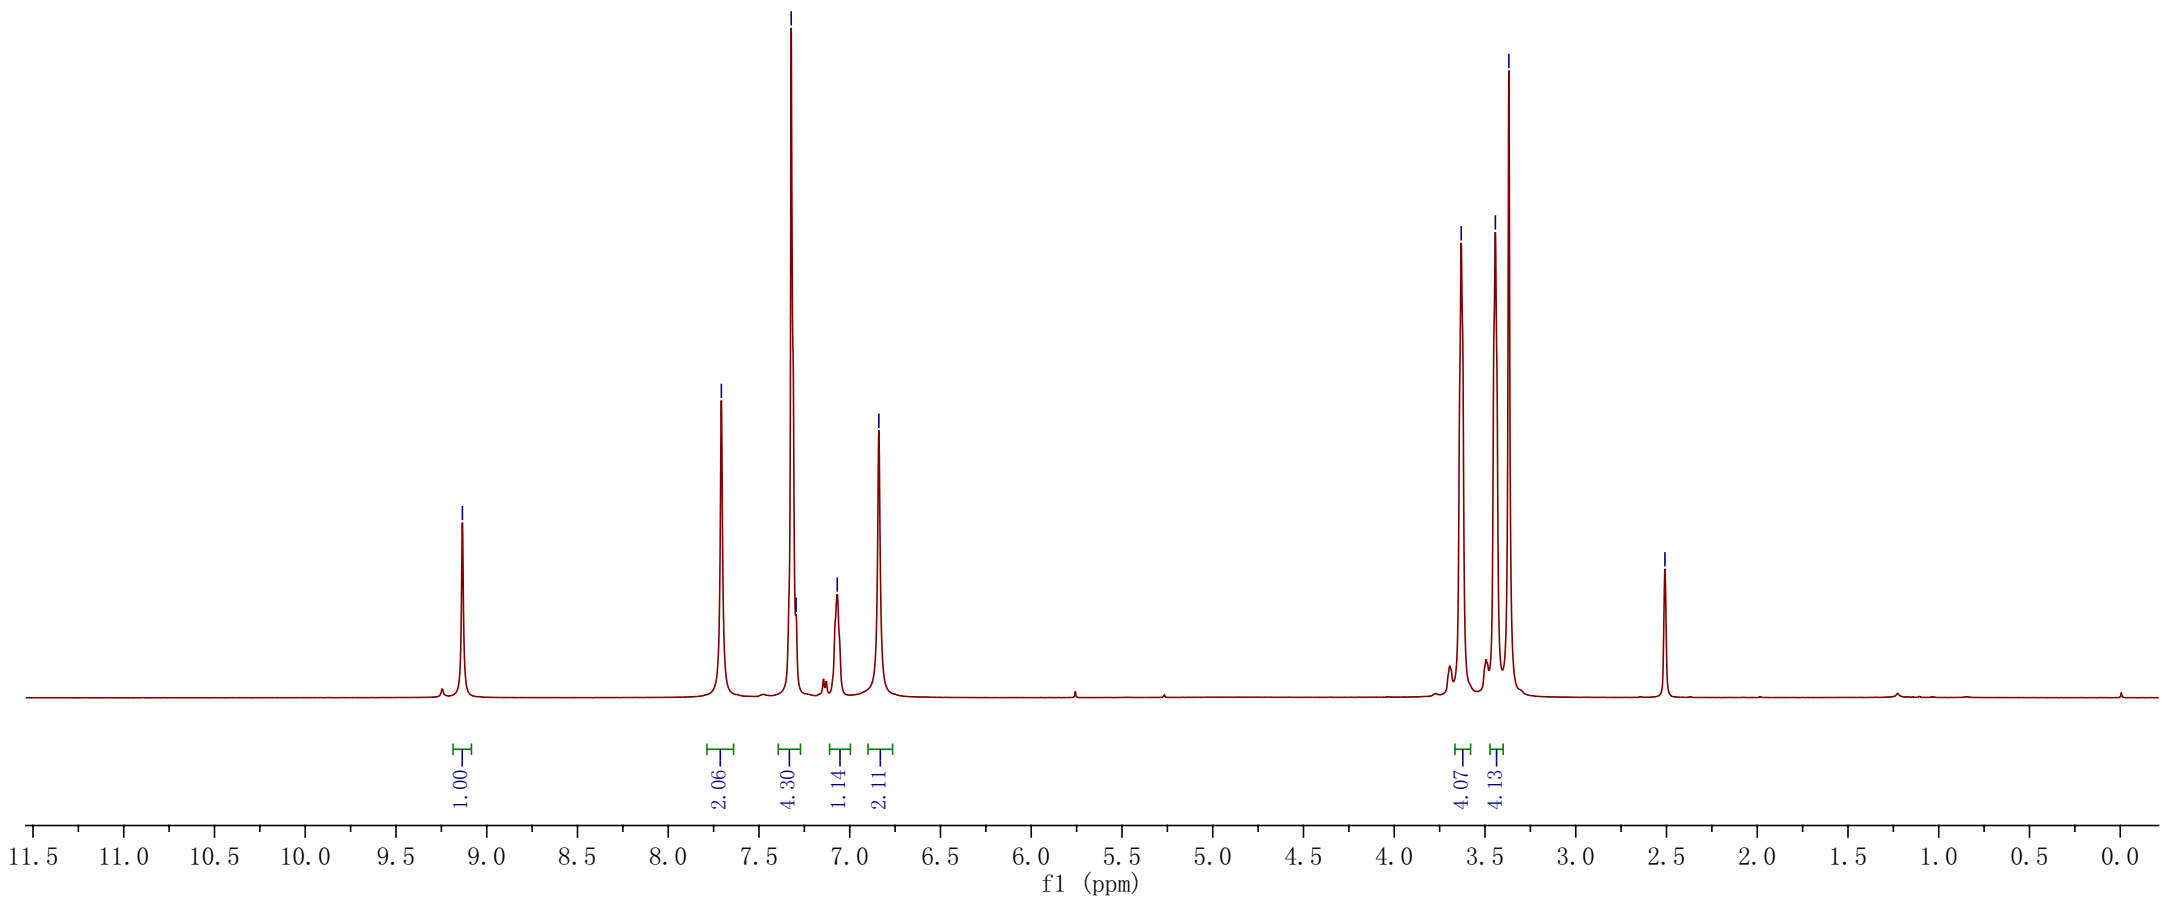

14140506  
BAQ140421 DMSO

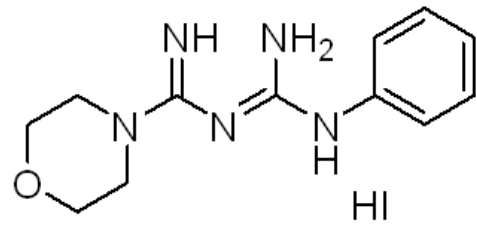

**3t**

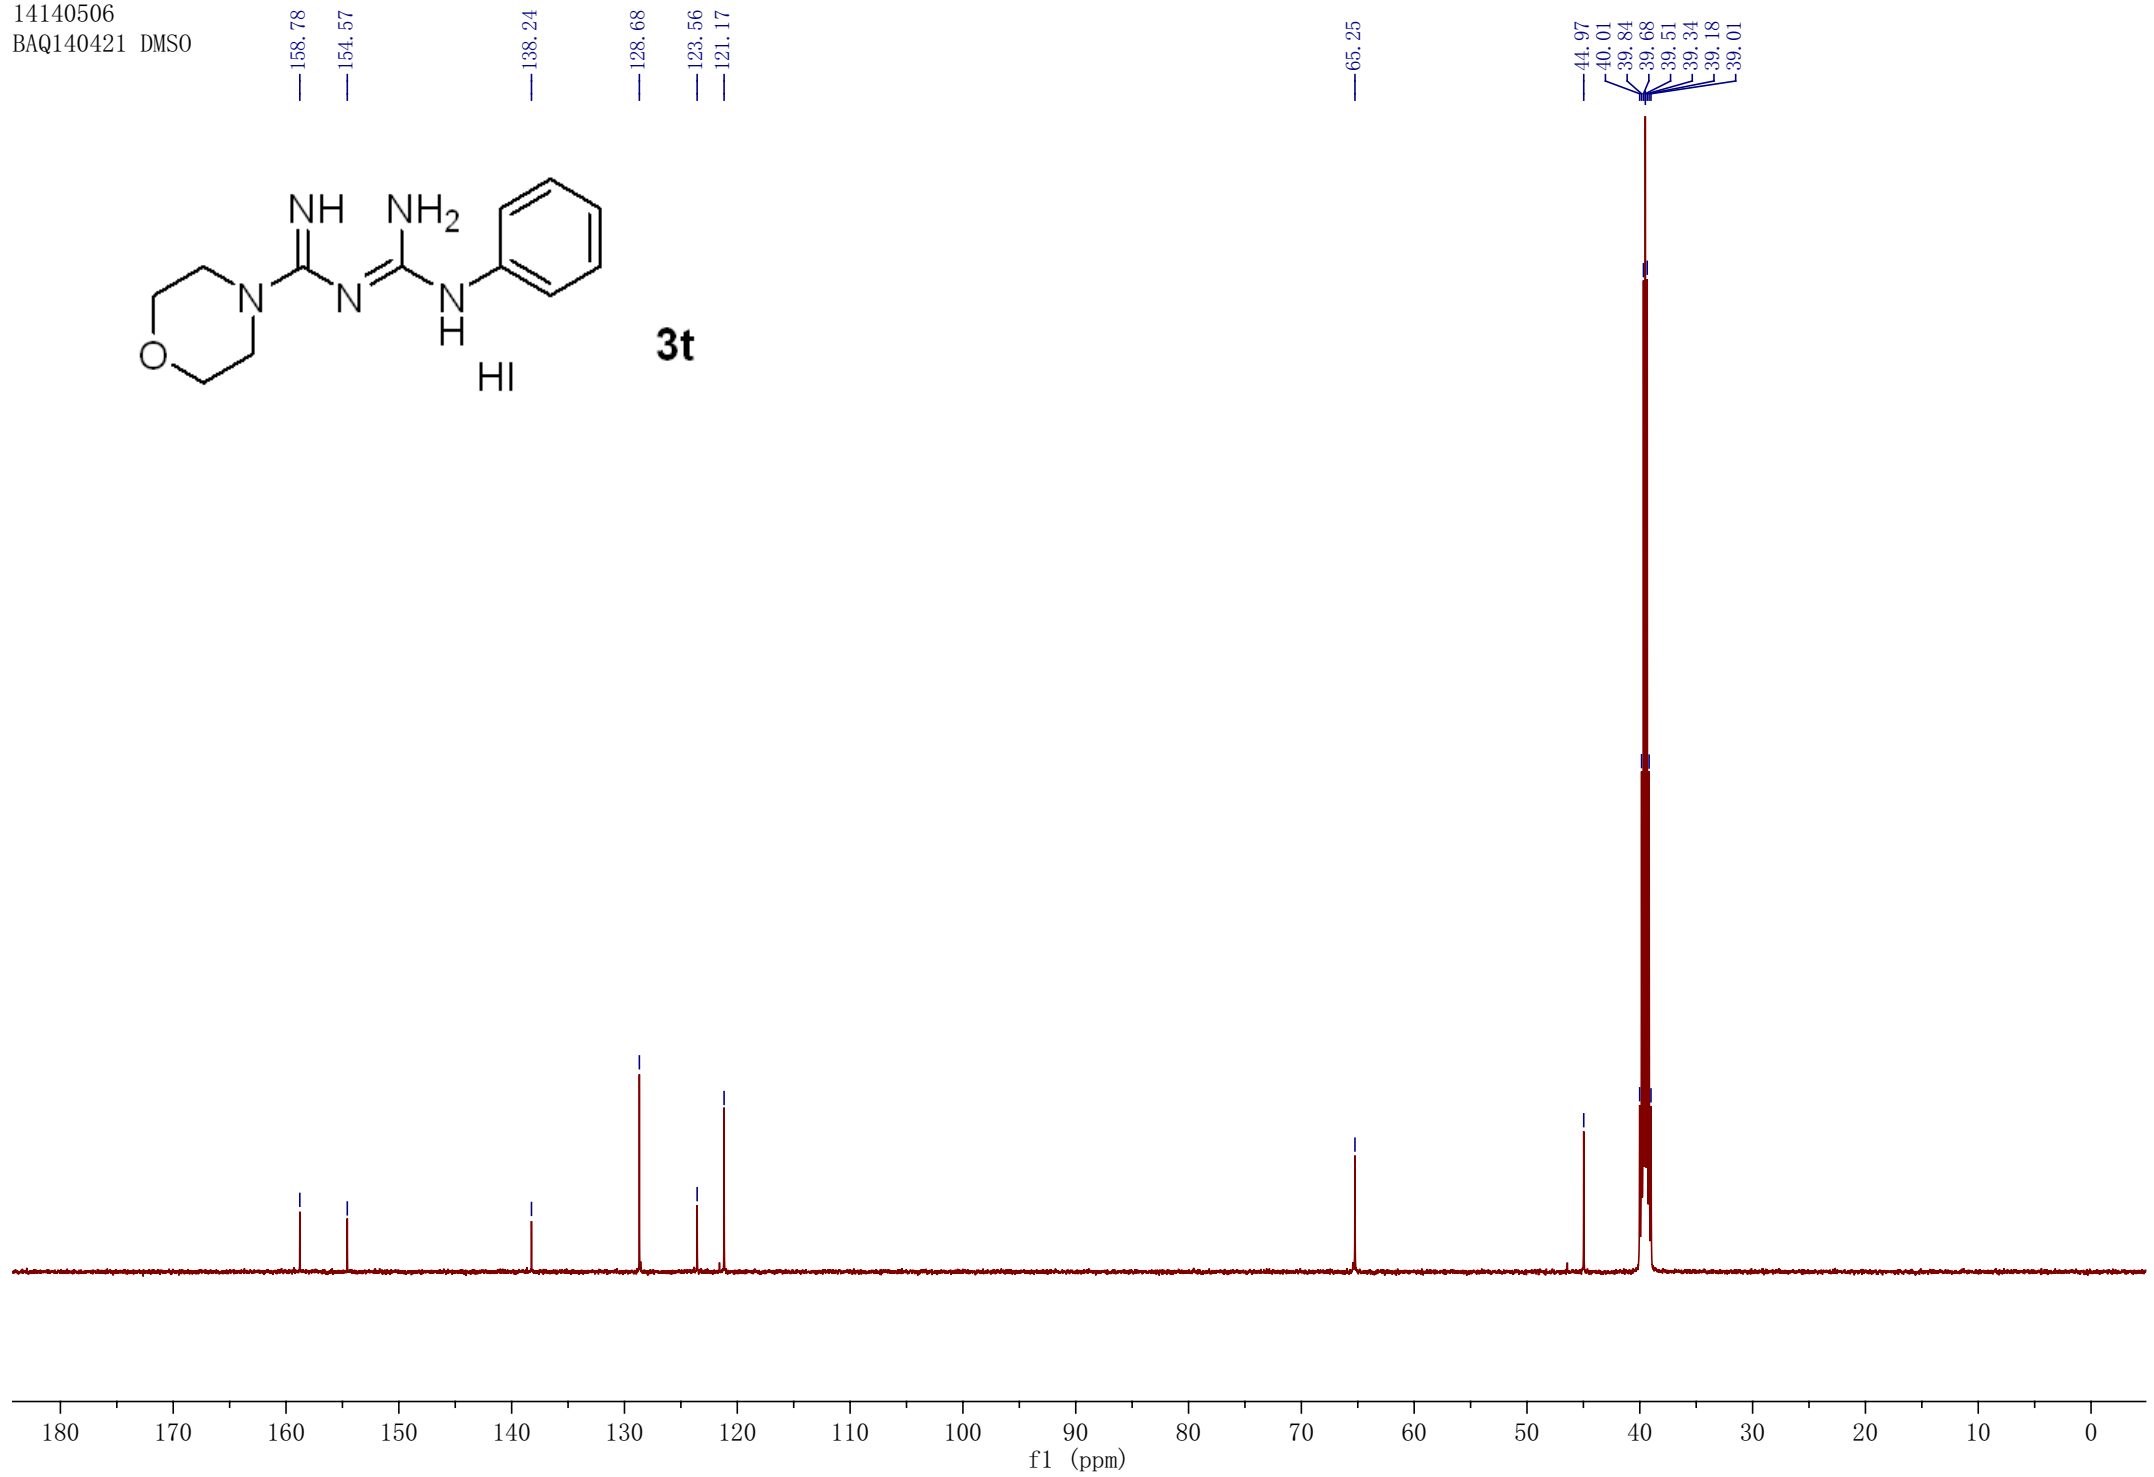

140409  
BAQ140405a DMSO

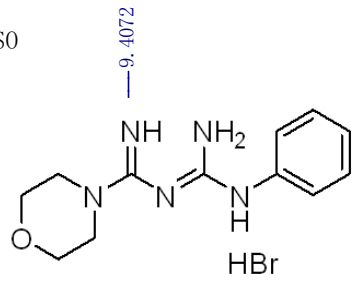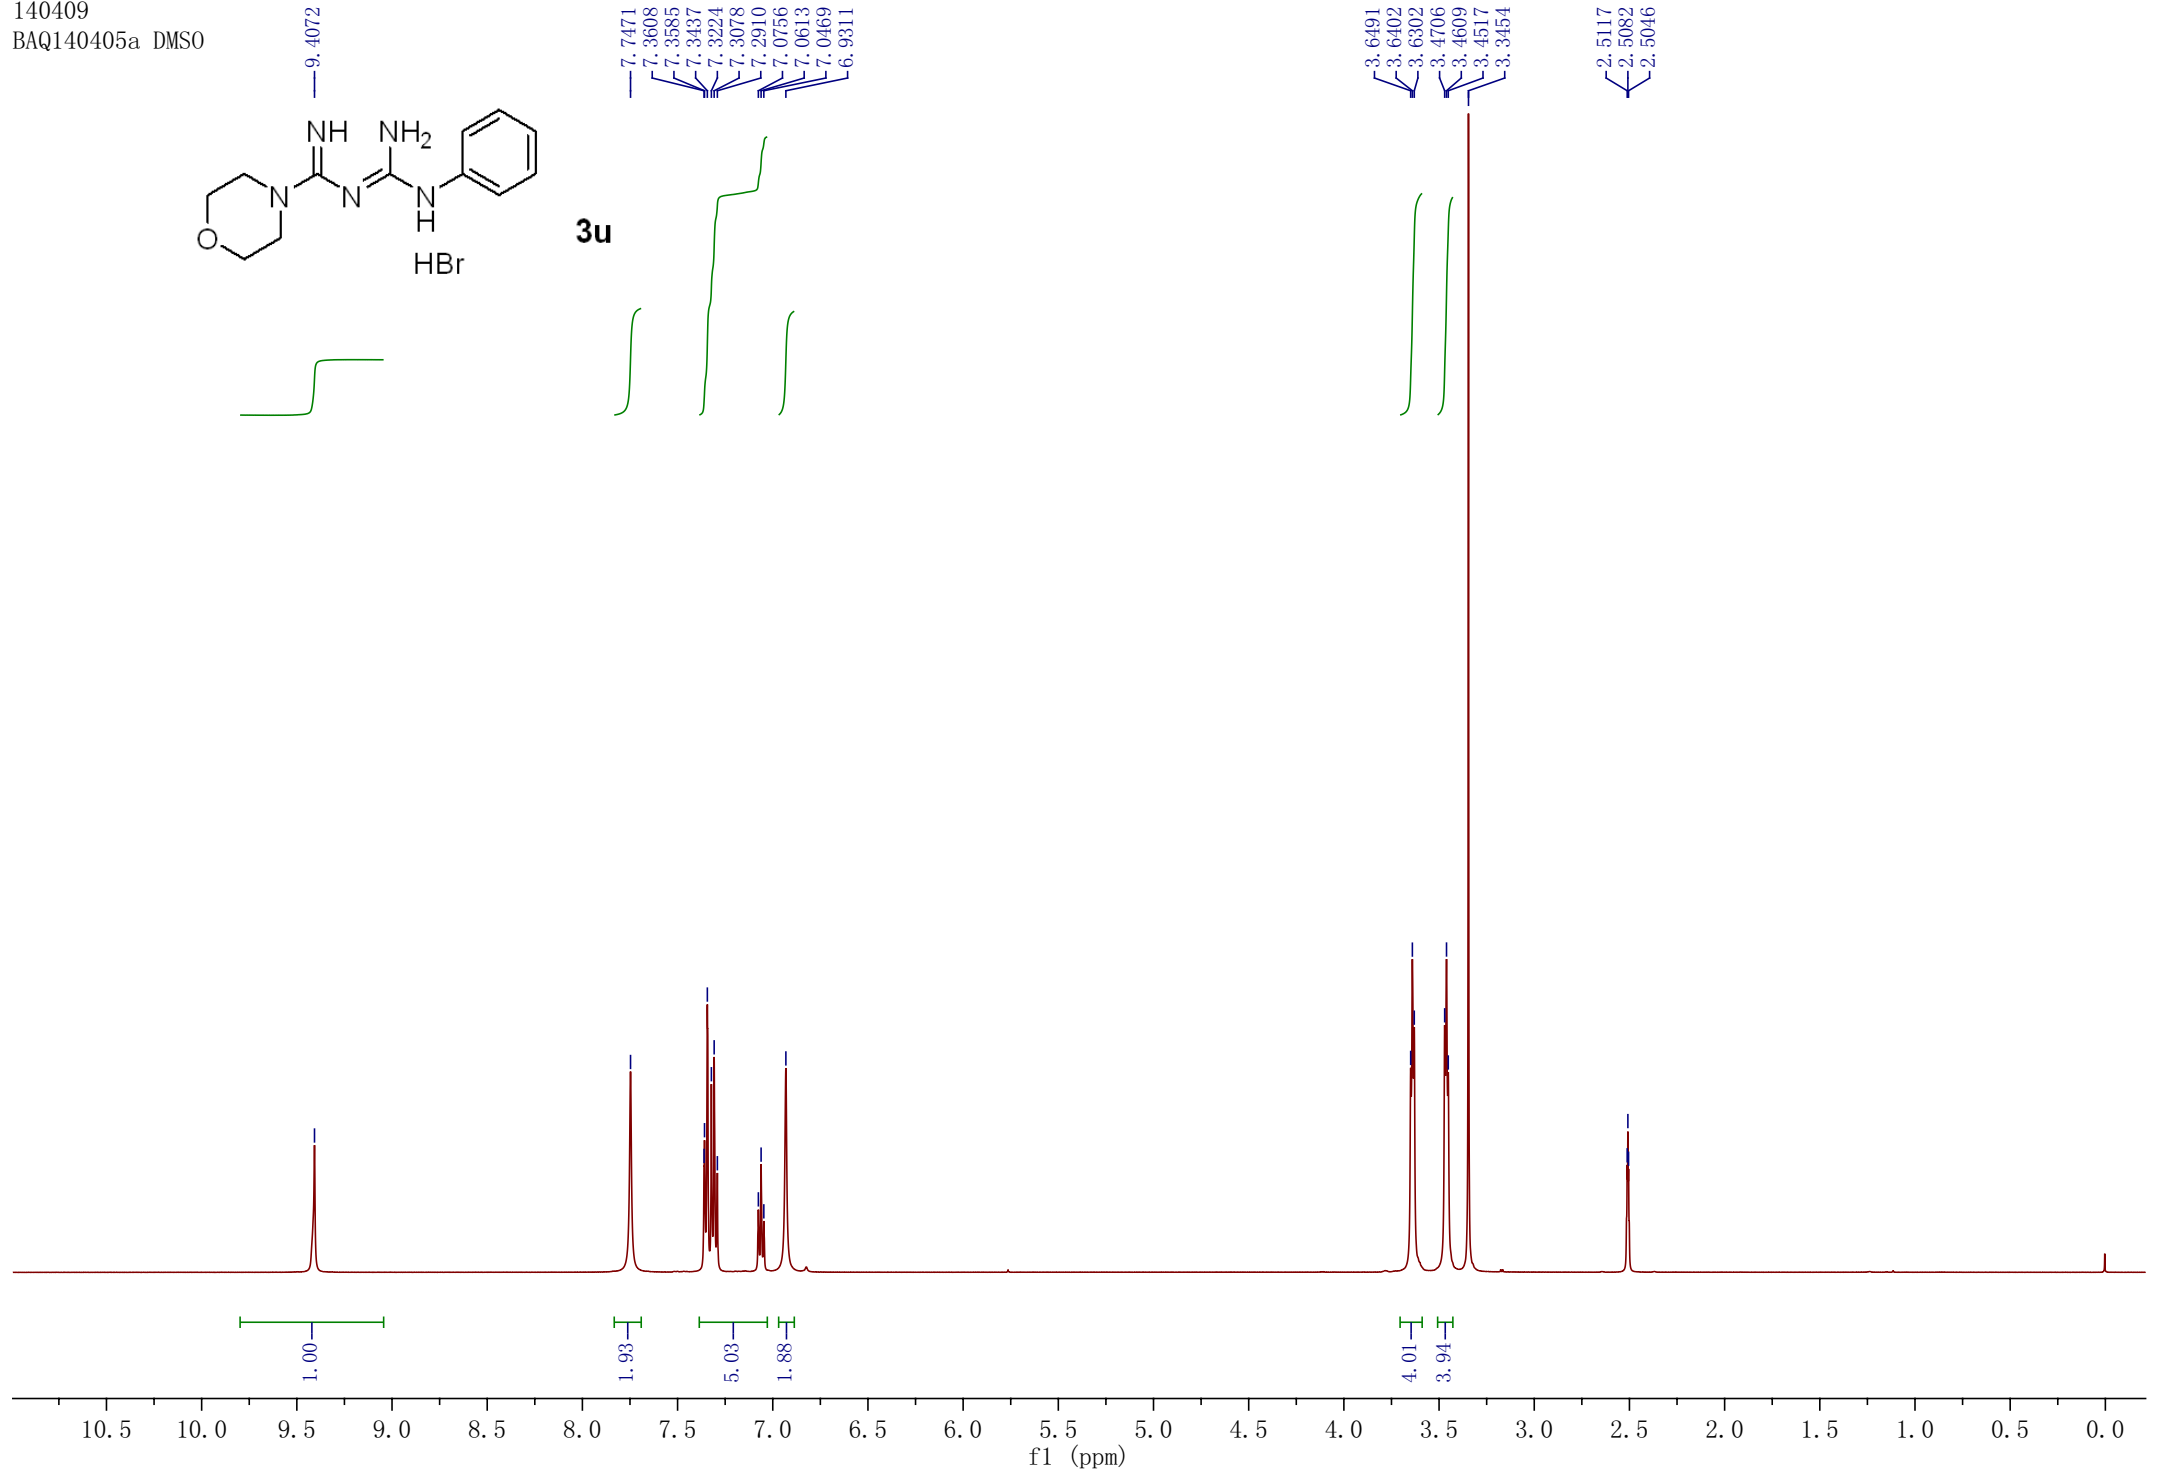

140409  
BAQ140405a DMSO

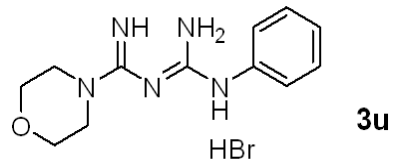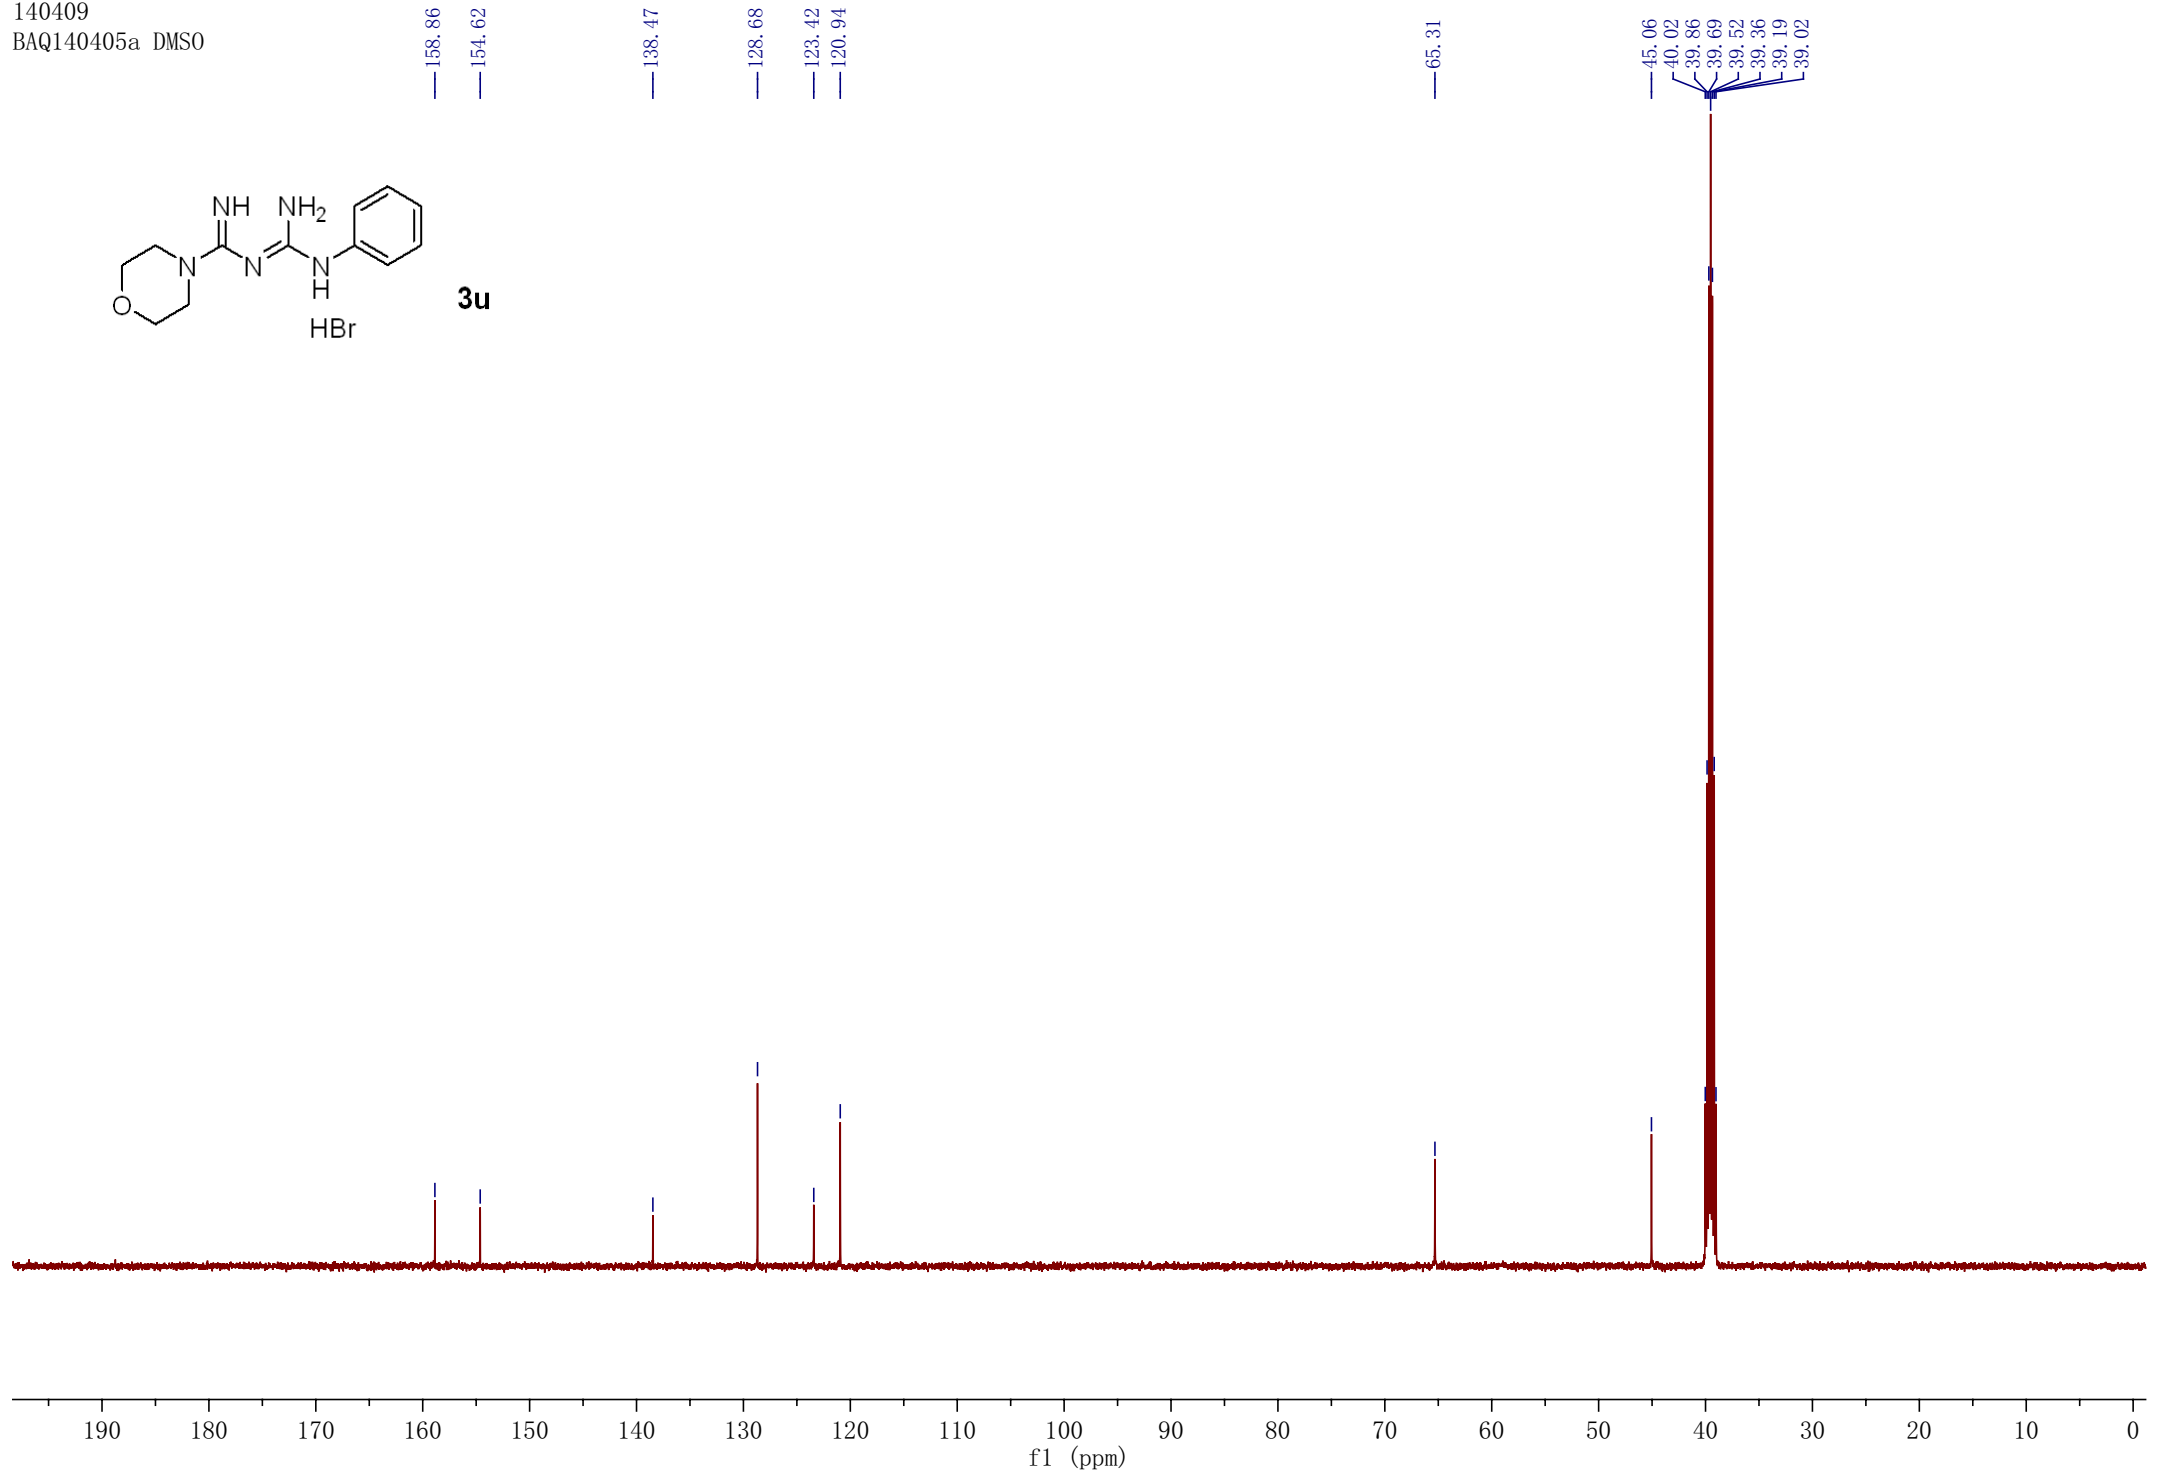

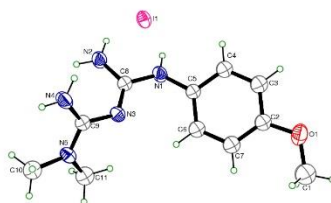

**Figure S1.** Crystal structure of **3a** (50% ellipsoids). Selected bond lengths (Å): C1-O1 1.414 (5); C2-O1 1.372 (4); C2-C3 1.379 (5); C2-C7 1.384 (5); C3-C4 1.377 (5); C4-C5 1.392 (4); C5-C6 1.382 (4); C5-N1 1.418 (4); C6-C7 1.386 (5); C8-N3 1.299 (4); C8-N1 1.353 (4); C8-N2 1.354 (4); C9-N5 1.320 (4); C9-N4 1.328 (4); C9-N3 1.353 (4); C10-N5 1.456 (4); C11-N5 1.461 (4).

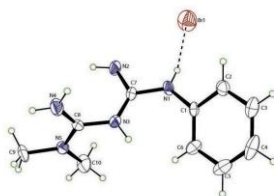

**Figure S2.** Crystal structure of **3b** (50% ellipsoids). Selected bond lengths (Å): C1-C6 1.355 (13); C1-C 2 1.413 (13); C1-N1 1.412 (11); C2-C3 1.385 (15); C3-C4 1.365 (19); C4-C5 1.354 (19); C5-C 6 1.401 (15); C7-N3 1.271 (12); C7-N2 1.376 (12); C7-N1 1.375 (11); C8-N4 1.318 (13); C8-N5 1.323(11); C8-N3 1.348 (12), C9-N5 1.461 (11); C10-N5 1.480 (12)
